# Supplementary material for: Twists or turns: stabilising alpha vs. beta turns in tetrapeptides
Source: Royal Society of Chemistry journal article supplement (doi:10.1039/c9sc04153b), 2019-01-01
Supplement: c9sc04153b1.pdf [file c9sc04153b1.pdf]

## Supporting Information

### Twists or Turns: stabilising alpha vs beta turns in tetrapeptides

Huy N. Hoang,<sup>[a]</sup> Timothy A. Hill,<sup>[a]</sup> Gloria Ruiz-Gómez,<sup>[a,b]</sup> Frederik Diness,<sup>[a,c]</sup> Jody M. Mason,<sup>[a,d]</sup>  
Chongyang Wu,<sup>[a]</sup> Giovanni Abbenante,<sup>[a]</sup> Nicholas E. Shepherd,<sup>[a]</sup> and David P. Fairlie\*<sup>[a]</sup>

Australian Research Council Centre of Excellence in Advanced Molecular Imaging,  
Institute for Molecular Bioscience, The University of Queensland,  
Brisbane, QLD 4072, Australia

Email : [d.fairlie@imb.uq.edu.au](mailto:d.fairlie@imb.uq.edu.au)

|                                                                                                                  |           |
|------------------------------------------------------------------------------------------------------------------|-----------|
| <b>1. General</b>                                                                                                | <b>3</b>  |
| <b>2. Peptide Synthesis</b>                                                                                      | <b>3</b>  |
| 2.1 Peptide assembly                                                                                             | 3         |
| 2.2 Cyclisation                                                                                                  | 3         |
| 2.3 Cleavage                                                                                                     | 4         |
| 2.4 HPLC-MS Characterisation                                                                                     | 5         |
| <b>3. CD Spectroscopy</b>                                                                                        | <b>5</b>  |
| <b>4. NMR Spectroscopy</b>                                                                                       | <b>6</b>  |
| <b>5. Structure Calculations</b>                                                                                 | <b>6</b>  |
| <b>6. Molecular Dynamics</b>                                                                                     | <b>7</b>  |
| <b>7. NMR Data</b>                                                                                               | <b>12</b> |
| <b>Table S1.</b> $\phi$ , $\psi$ angles for idealized $\alpha$ -turns.                                           | <b>9</b>  |
| <b>Table S2.</b> $\phi$ , $\psi$ angles for idealized $\gamma$ -, $\beta$ -turns.                                | <b>9</b>  |
| <b>Table S3.</b> Cyclic tetrapeptides examined in this study.                                                    | <b>10</b> |
| <b>Table S4.</b> Peptide characterization data                                                                   | <b>11</b> |
| <b>Figure S1.</b> Molar Ellipticity at $\lambda = 215$ nm for compounds mimicking alpha turns versus beta turns. | <b>12</b> |
| <b>Figure S1.</b> 600 MHz $^1\text{H}$ NMR spectrum of Ac-cyclo-(1,4)-[DapAAD]-NH <sub>2</sub> ( <b>1</b> ).     | <b>13</b> |
| <b>Figure S2.</b> 600 MHz $^1\text{H}$ NMR spectrum of Ac-cyclo-(1,4)-[DabAAD]-NH <sub>2</sub> ( <b>2</b> ).     | <b>13</b> |
| <b>Figure S3.</b> 600 MHz $^1\text{H}$ NMR spectrum of Ac-cyclo-(1,4)-[OAAD]-NH <sub>2</sub> ( <b>3</b> ).       | <b>14</b> |
| <b>Figure S4.</b> 600 MHz $^1\text{H}$ NMR spectrum of Ac-cyclo-(1,4)-[KAAD]-NH <sub>2</sub> ( <b>4</b> ).       | <b>14</b> |
| <b>Figure S5.</b> 600 MHz $^1\text{H}$ NMR spectrum of Ac-cyclo-(1,4)-[DAADap]-NH <sub>2</sub> ( <b>5</b> ).     | <b>15</b> |
| <b>Figure S6.</b> 600 MHz $^1\text{H}$ NMR spectrum of Ac-cyclo-(1,4)-[DAADab]-NH <sub>2</sub> ( <b>6</b> ).     | <b>15</b> |
| <b>Figure S7.</b> 600 MHz $^1\text{H}$ NMR spectrum of Ac-cyclo-(1,4)-[DAAO]-NH <sub>2</sub> ( <b>7</b> ).       | <b>16</b> |
| <b>Figure S8.</b> 600 MHz $^1\text{H}$ NMR spectrum of Ac-cyclo-(1,4)-[DAAK]-NH <sub>2</sub> ( <b>8</b> ).       | <b>16</b> |
| <b>Figure S9.</b> 600 MHz $^1\text{H}$ NMR spectrum of Ac-cyclo-(1,4)-[DapAAE]-NH <sub>2</sub> ( <b>9</b> ).     | <b>17</b> |
| <b>Figure S10.</b> 600 MHz $^1\text{H}$ NMR spectrum of Ac-cyclo-(1,4)-[DabAAE]-NH <sub>2</sub> ( <b>10</b> ).   | <b>17</b> |
| <b>Figure S11.</b> 600 MHz $^1\text{H}$ NMR spectrum of Ac-cyclo-(1,4)-[OAAE]-NH <sub>2</sub> ( <b>11</b> ).     | <b>18</b> |
| <b>Figure S12.</b> 600 MHz $^1\text{H}$ NMR spectrum of Ac-cyclo-(1,4)-[KAAE]-NH <sub>2</sub> ( <b>12</b> ).     | <b>18</b> |
| <b>Figure S13.</b> 600 MHz $^1\text{H}$ NMR spectrum of Ac-cyclo-(1,4)-[EAADab]-NH <sub>2</sub> ( <b>13</b> ).   | <b>19</b> |
| <b>Figure S14.</b> 600 MHz $^1\text{H}$ NMR spectrum of Ac-cyclo-(1,4)-[EAADap]-NH <sub>2</sub> ( <b>14</b> ).   | <b>19</b> |
| <b>Figure S15.</b> 600 MHz $^1\text{H}$ NMR spectrum of Ac-cyclo-(1,4)-[EAAO]-NH <sub>2</sub> ( <b>15</b> ).     | <b>20</b> |
| <b>Figure S16.</b> 600 MHz $^1\text{H}$ NMR spectrum of Ac-cyclo-(1,4)-[EAAK]-NH <sub>2</sub> ( <b>16</b> ).     | <b>20</b> |
| <b>Figure S17.</b> 600 MHz $^1\text{H}$ NMR spectrum of Ac-cyclo-(1,4)-[dAADap]-NH <sub>2</sub> ( <b>17</b> ).   | <b>21</b> |

|                                                                                                                               |    |
|-------------------------------------------------------------------------------------------------------------------------------|----|
| <b>Figure S18.</b> 600 MHz $^1\text{H}$ NMR spectrum of Ac-cyclo-(1,4)-[eAADap]-NH <sub>2</sub> ( <b>18</b> ).                | 21 |
| <b>Figure S19.</b> 600 MHz $^1\text{H}$ NMR spectrum of Ac-cyclo-(1,4)-[dAADab]-NH <sub>2</sub> ( <b>19</b> ).                | 22 |
| <b>Figure S20.</b> 600 MHz $^1\text{H}$ NMR spectrum of Ac-cyclo-(1,4)-[dAAO]-NH <sub>2</sub> ( <b>20</b> ).                  | 22 |
| <b>Figure S21.</b> 600 MHz $^1\text{H}$ NMR spectrum of Ac-cyclo-(1,4)-[IsoDAAO]-NH <sub>2</sub> ( <b>21</b> ).               | 23 |
| <b>Figure S22.</b> 600 MHz $^1\text{H}$ NMR spectrum of Ac-cyclo-(1,4)-[IsodAAO]-NH <sub>2</sub> ( <b>22</b> ).               | 23 |
| <b>Figure S23.</b> 600 MHz $^1\text{H}$ NMR spectrum of Cyclo-(1,4)-[SuccDAAO]-NH <sub>2</sub> ( <b>23</b> ).                 | 24 |
| <b>Figure S24.</b> 600 MHz $^1\text{H}$ NMR spectrum of Cyclo-(1,4)-[GlutDAAO]-NH <sub>2</sub> ( <b>24</b> ).                 | 24 |
| <br>                                                                                                                          |    |
| <b>Table S5.</b> Amide proton coupling constants of <b>1–24</b> .                                                             | 25 |
| <b>Table S6.</b> Amide proton temperature coefficients (ppb/K) for <b>1–24</b> .                                              | 25 |
| <b>Table S7.</b> Proton chemical shifts for <b>1–24</b> .                                                                     | 26 |
| <b>Table S8.</b> $\phi$ , $\psi$ , $\chi_1$ angles for <b>5–7, 9, 13, 15, 17–20</b> .                                         | 27 |
| <b>Table S9.</b> Restraints used to calculate the structure of <b>5</b> Ac-[DAADap]-NH <sub>2</sub> .                         | 28 |
| <b>Table S10.</b> Restraints used to calculate the structure of <b>6</b> Ac-[DAADab]-NH <sub>2</sub> .                        | 29 |
| <b>Table S11.</b> Restraints used to calculate the structure of <b>7</b> Ac-[DAAO]-NH <sub>2</sub> .                          | 29 |
| <b>Table S12.</b> Restraints used to calculate the structure of <b>9</b> Ac-[DapAAE]-NH <sub>2</sub> .                        | 30 |
| <b>Table S13.</b> Restraints used to calculate the structure of <b>13</b> Ac-[EAADap]-NH <sub>2</sub> .                       | 31 |
| <b>Table S14.</b> Restraints used to calculate the structure of <b>15</b> Ac-[EAAO]-NH <sub>2</sub> .                         | 32 |
| <b>Table S15.</b> Restraints used to calculate the structure of <b>17</b> Ac-[dAADap]-NH <sub>2</sub> .                       | 33 |
| <b>Table S16.</b> Restraints used to calculate the structure of <b>18</b> Ac-[eAADap]-NH <sub>2</sub> .                       | 34 |
| <b>Table S17.</b> Restraints used to calculate the structure of <b>19</b> Ac-[dAADab]-NH <sub>2</sub> .                       | 35 |
| <b>Table S18.</b> Restraints used to calculate the structure of <b>20</b> Ac-[dAAO]-NH <sub>2</sub> .                         | 36 |
| <b>Table S19.</b> Restraints used to calculate the structure of <b>21</b> Ac-[IsoDAADap]-NH <sub>2</sub> .                    | 37 |
| <b>Table S20.</b> Restraints used to calculate the structure of <b>22</b> Ac-[IsodAADap]-NH <sub>2</sub> .                    | 37 |
| <b>Table S21.</b> Restraints used to calculate the structure of <b>23</b> [SuccAADap]-NH <sub>2</sub> .                       | 38 |
| <b>Table S22.</b> Restraints used to calculate the structure of <b>24</b> Ac-[GlutAADap]-NH <sub>2</sub> .                    | 39 |
| <br>                                                                                                                          |    |
| <b>Figure S25.</b> Molecular dynamics simulations (RMSD) <b>5–7, 9, 13, 15, 18–21</b> .                                       | 40 |
| <b>Figure S26.</b> Molecular dynamics simulations (Chi1 angle for 4 <sup>th</sup> residue (Z)) <b>5–7, 9, 13, 15, 18–21</b> . | 41 |
| <b>Figure S27.</b> Skewers and sequential ROE walk for Ac-[DAADap]-NH <sub>2</sub> ( <b>5</b> ).                              | 42 |
| <b>Figure S28.</b> Skewers and sequential ROE walk for Ac-[DAADab]-NH <sub>2</sub> ( <b>6</b> ).                              | 43 |
| <b>Figure S29.</b> Skewers and sequential ROE walk for Ac-[DAAO]-NH <sub>2</sub> ( <b>7</b> ).                                | 44 |
| <b>Figure S30.</b> Skewers and sequential ROE walk for Ac-[DapAAE]-NH <sub>2</sub> ( <b>9</b> ).                              | 45 |
| <b>Figure S31.</b> Skewers and sequential ROE walk for Ac-[EAADap]-NH <sub>2</sub> ( <b>13</b> ).                             | 46 |
| <b>Figure S32.</b> Skewers and sequential ROE walk for Ac-[EAAO]-NH <sub>2</sub> ( <b>15</b> ).                               | 47 |
| <b>Figure S33.</b> Skewers and sequential ROE walk for Ac-[dAADap]-NH <sub>2</sub> ( <b>17</b> ).                             | 48 |
| <b>Figure S34.</b> Skewers and sequential ROE walk for Ac-[eAADap]-NH <sub>2</sub> ( <b>18</b> ).                             | 49 |
| <b>Figure S35.</b> Skewers and sequential ROE walk for Ac-[dAADab]-NH <sub>2</sub> ( <b>19</b> ).                             | 50 |
| <b>Figure S36.</b> Skewers and sequential ROE walk for Ac-[dAAO]-NH <sub>2</sub> ( <b>20</b> ).                               | 51 |
| <b>Figure S37.</b> TOCSY spectrum for Ac-[IsoDAADap]-NH <sub>2</sub> ( <b>21</b> ).                                           | 52 |
| <b>Figure S38.</b> TOCSY spectrum for Ac-[IsodAADap]-NH <sub>2</sub> ( <b>22</b> ).                                           | 53 |
| <b>Figure S39.</b> TOCSY spectrum for [SuccDAADap]-NH <sub>2</sub> ( <b>23</b> ).                                             | 54 |
| <b>Figure S40.</b> TOCSY spectrum for [GlutDAADap]-NH <sub>2</sub> ( <b>24</b> ).                                             | 55 |

## NMR spectra of N-capped peptides

56-59

## 1. General

Abbreviations: BOP, benzotriazol-1-yloxy-tris(dimethylamino)-phosphonium; DCM, dichloromethane; DIPEA, N,N-diisopropylethylamine; DMF, N,N-dimethylformamide; ESMS, electrospray mass spectrometry; HATU, 2-(1H-7-azabenzotriazol-1-yl)-1,1,3,3-tetramethyl uranium hexafluorophosphate methanaminium; HBTU, benzotriazol-1-yl-1,1,3,3-tetramethyluronium; NMR, Nuclear Magnetic Resonance Spectroscopy; TFA, trifluoroacetic acid.

Fmoc-Asp(OPip)-OH was obtained from Bachem (Bubendorf, Switzerland). Fmoc-Lys(Mtt)-OH, other L-amino acids, Rink amide MBHA LL, and Rink Amide MBHA resins were obtained from Novabiochem (Melbourne, Australia). Benzotriazol-1-yl-1,1,3,3-tetramethyluronium (HBTU) and benzotriazol-1-yloxy-tris(dimethylamino)-phosphonium (BOP) were obtained from Iris Biotech (Germany). Dimethylformamide, diisopropylethylamine, trifluoroacetic acid other reagents were of peptide synthesis grade and obtained from Auspep (Melbourne, Australia).

## 2. Peptide Synthesis

### 2.1 Peptide assembly

Protected amino acids and resins were obtained from ChemImpex and Novabiochem. TFA, piperidine, DIPEA, DCM and DMF (peptide synthesis grade) were reagent grade unless otherwise stated. Peptides were synthesized using Fmoc solid support chemistry on Rink amide resin (low loading 0.38 mmol/g; Novabiochem) at a 100  $\mu$ M scale on a Symphony Multiplex Synthesizer. Amino acids (4 eq.) were activated using HCTU (4 eq.) and DIPEA (8 eq.) in DMF (2  $\times$  20 min) prior to remove N-terminal Fmoc protecting group using 20% piperidine in DMF (2  $\times$  5 min).

### 2.2 Cyclisation

Formation of lactam constraints was conducted on or off resin. For peptides **22-30** on resin cyclisation was used. Side-chain protecting groups of aspartic or glutamic acid and lysine, ornithine, diaminobutyric acid (Dab) or diaminopropionic acid (Dap) were first removed. Phenylisopropyl (OPip) esters and methyl trityl (Mtt) protecting groups were removed by allowing 5  $\times$  10 mL portions of 3% TFA in DCM to drip through the resin. The resin was then washed with 2  $\times$  10 mL portions of DCM, 2  $\times$  10 mL portions of DMF and 2  $\times$  10 mL portions of 5% DIPEA in DMF. For D-aspartate and D-glutamate containing peptides **28** and **29** Fmoc-D-Asp(OAllyl)-OH and Fmoc-D-Glu(OAllyl)-OH were used. Allyl esters were removed by treating the peptide resin with Pd(PPh<sub>3</sub>)<sub>4</sub> (5 mol%) N,N-dimethylbarbituric acid (5eq) in DCM under argon for two hours, repeating the procedure a

second time. Cyclization was achieved on peptide-resin with BOP or PyBOP (2 eq), DIPEA (2 eq), HOAt (2eq) in DMF overnight at room temperature with periodic nitrogen bubbling to mix. For peptides 1-16, off resin cyclisation was used. Asp/Glu were protected with tBu esters and Lys/Orn/Dab/Dap were protected with Boc carbamates. After linear assembly, the tetrapeptides were cleaved normally. After lyophilisation, peptides were redissolved in DMF to a concentration of 0.1 M and treated with BOP (2 eq) and DIPEA (2eq) and heated at 60 °C overnight with stirring under nitrogen. DMF was then removed *in vacuo* and peptide residues redissolved in acetonitrile/water 1:1 and lyophilised for purification.

For isoaspartate cyclic peptides **31-32**, linear peptides were assembled incorporating Fmoc-Dap(Mtt)-OH and keeping the final Fmoc group on the N-terminus. Whilst still on resin, Mtt protecting groups were removed from Dap side chains and Fmoc-(L-or D-)-Asp(OAll)-OH was coupled onto the Dap side chain  $\gamma$ -amino through its  $\alpha$ -carboxyl. Next, the  $\beta$ -carboxyl allyl ester was removed using the previously described conditions followed by simultaneous deprotection of the N-terminal Fmoc group and the aspartate Fmoc group with 20% piperidine in DMF. The peptide was then cyclised with BOP (2eq), DIPEA(2eq) and HOAt (2eq) overnight at room temperature. The peptide resin was then washed with DMF ( $2 \times 10$  mL) and treated with acetic anhydride (5eq), DIPEA (5eq) in DMF to acetylate the aspartate  $\alpha$ -amino group. The isoaspartate cyclic tetrapeptide is formed selectively as cyclisation of the aspartate  $\beta$ -carboxyl onto the aspartate  $\alpha$ -amino group would result in a highly unfavourable four membered lactam.

For succinate and glutarate cyclised peptides **33** and **34**, linear peptides were assembled incorporating Fmoc-Dap(Mtt)-OH and with removal of the final N-terminal Fmoc group. Succinic or glutaric anhydride (2eq) and DIPEA (2eq) were coupled onto the resin twice for 2 h at room temperature. The resin was washed with DMF ( $2 \times 10$  mL) and then treated twice with water (10 eq) and DIPEA (10 eq) in DMF for 1 h to hydrolyse any succinic or glutaric polyanhydrides formed during coupling. Then the Mtt group on the side chain of Dap was removed with the usual conditions, the resin was washed and cyclised as described previously.

## 2.3 Cleavage

Peptides were cleaved from the resin using TFA/TIPS/H<sub>2</sub>O (95/2.5/2.5) for 2 h. Solutions were filtered from the resin and the cleavage mixture removed *in vacuo*. The resulting residues treated with ice-cold diethyl ether to precipitate the peptides. Ether was removed by decanting. The crude peptides were dried under nitrogen, dissolved in acetonitrile-water (1:1) and lyophilised. Crude peptides were purified by reverse-phase HPLC on Waters 486 system equipped with a Rheodyne semi-preparative injector with a 5 mL loop volume on a Phenomenex Luna C18 15  $\mu$ m column, 250 mm x 22 mm, at

20 mL/min using linear gradient elution (solvent A is water and 0.1% TFA; solvent B is 90% MeCN, 10% water, and 0.1% TFA) and UV detection at 214 nm.

## 2.4 HPLC-MS Characterization

Purity of compounds assessed via analytical rpHPLC (Waters 996 on a Phenomenex Luna C18 5  $\mu$ m column, 250 x 4 mm (**condition A**) or on a Varian Pursuit C8 5  $\mu$ m column, PN A 3030-250x046 (**condition B**) or on a Agilent Technologies 1200 Seires on a Phenomenex Luna C8 5  $\mu$ m column, 250 x 4.60 mm (**condition C**), at 1 mL/min by using a linear gradient 0-100%B over 20 mins), or analytical UHPLC-MS method: Shimadzu HPLC system Waters Acquity UPLC HSS T3 column, 1.8  $\mu$ m, 2.1 mm  $\times$  50 mm – gradient 0-100% solvent B (H<sub>2</sub>O/MeCN 10/90 with 0.05% TFA) in solvent A (H<sub>2</sub>O with 0.05% TFA) over 6 min at 0.4 mL/min, (**condition D**) mass spectrometry, and NMR. The molecular weight of the peptides (1 mg/mL) was determined by electrospray mass spectrometry on a Micromass LCT mass spectrometer and by HRMS. Note different retention times between Waters and Agilent analytical HPLCs come from the different equilibration times used (10 min for Waters, 3 min for Agilent).

## 3. CD spectroscopy

CD measurements were performed using a Jasco model J-710 spectropolarimeter which was routinely calibrated with (1S)-(+)-10-camphorsulfonic acid. A stock solution of 1–5 mg of peptide was dissolved in 600  $\mu$ L of 18 M $\Omega$  deionised water, 60  $\mu$ L D<sub>2</sub>O and 10  $\mu$ L of 50 mM TSS was added as an internal standard. Accurate concentrations of these solutions were then determined using the PULCON method (Dreier, L. and G. Wider, *Concentration measurements by PULCON using X-filtered or 2D NMR spectra*. Magn Reson Chem, **2006**. 44 Spec No: p. S206-12.). 90° pulses were accurately determined and then 1D Spectra were acquired using the standard watergate sequence with a ns= 16, d1= 30s to ensure complete relaxation of proton signals. Integration of well resolved signals compared to the internal TSS standard were used to determine concentration of peptide solutions using the following equation:

$$[Peptide] = [DSS] \times \left( \frac{Integral_{Peptide} \times \#H_{DSS}}{Integral_{DSS} \times \#H_{peptide}} \right) \quad (Eq. 1)$$

where  $[Peptide]$  is the peptide concentration,  $[DSS]$  is the concentration of DSS in the NMR tube (746  $\mu$ M).  $\#H$  is the number of protons corresponding to the *Integral* (in absolute units) for the peptide signal or DSS signal.

An appropriate amount of the NMR stock solutions was then used to prepare the CD solution making up the difference with 10 mM Phosphate Buffer (pH 7.4) and TFE. Spectra were recorded at room

temperature (298K), with a 0.1 cm Jasco quartz cell over the wavelength range 260-185 nm at 50 nm/min, with a bandwidth of 1.0 nm, response time of 1 s, resolution step width of 1 nm and sensitivity of 20-50 Mdeg. Each spectrum represents the average of 5 scans. Spectra were analysed using the spectral analysis software and smoothed using ‘adaptive smoothing’ function.

#### 4. NMR Spectroscopy

1D and 2D  $^1\text{H}$ -NMR spectra were recorded on a Bruker Avance III DRX-600 spectrometer with Cryo-Probe. 2D  $^1\text{H}$ -spectra were recorded in phase-sensitive mode using time-proportional phase incrementation for quadrature detection in the  $t_1$  dimension. The 2D experiments included TOCSY (standard Bruker mlevgpqh pulse program), ROESY (standard Bruker roesygpqh pulse program), NOESY and dqfCOSY (standard Bruker dqfcosygpqh pulse program). TOCSY spectra were acquired over 6887 Hz with 2048 complex data points in  $F_2$ , 256 increments in  $F_1$  and 8 scans per increment. ROESY and NOESY spectra were acquired over 6887 Hz with 4096 complex data points in  $F_2$ , 512 increments in  $F_1$  and 32 scans per increment. TOCSY, ROESY and NOESY spectra were acquired with several isotropic mixing times of 80 ms for TOCSY, 350 ms for ROESY. For all NMR experiments, water suppression was achieved using modified WATERGATE. For 1D  $^1\text{H}$  NMR spectra acquired in  $\text{H}_2\text{O}/\text{D}_2\text{O}$  (9:1), the water resonance was suppressed by low power irradiation during the relaxation delay (1.5 to 3.0 s). The variable temperature NMR experiments were performed in 10°C increments over the range of 278-318K. Spectra were processed using Topspin (Bruker, Germany). The  $t_1$  dimensions of all 2D spectra were zero-filled to 1024 real data points with 90° phase-shifted QSINE bell window functions applied in both dimensions followed by Fourier transformation and fifth order polynomial baseline correction.  $^1\text{H}$  chemical shifts were referenced to DSS ( $\delta$  0.00 ppm) in water.  $^3J_{\text{NHCH}\alpha}$  coupling constants were measured from 1D  $^1\text{H}$  NMR and dqf-COSY spectra. Sparky NMR was used to analyse 2D spectra and determine ROE peak volumes.

#### 5. Structure Calculations

Distance restraints used in calculating the structure for peptides in water were derived from ROESY (for peptides **5, 6, 7, 9, 13, 15, 17, 18, 21, 20, 21, 22, 23, 24**) spectra (recorded at 288K or 298K) using mixing time of 300ms. ROE cross-peak volumes obtained from SparkyNMR ensuring accurate gaussian peak fitting. Volumes were converted to distances using the relationship:

$$\text{Distance} = \log_6(\text{constant} \times \text{Volume}) \quad (\text{Eq. 2})$$

The *constant* was first derived using the volume of two known vicinal protons e.g. two  $\text{H}\beta$  protons in Asp set at a distance of 2.24 Å. When the derived *constant* was applied to Eq. 2 to determine distances, the strongest ROEs gave a distance of 2.7 Å, which is equivalent to the standard manual

binning technique (i.e. setting strong ROEs with an upper distance limit of 2.7 Å). All weaker ROE volumes then scaled accordingly up to a maximum of ~6.5 Å. This standardised ROE intensities and removed human error associated with manual classification. Standard pseudoatom distance corrections were applied for non-stereospecifically assigned protons. To address the possibility of conformational averaging, intensities were classified conservatively and only upper distance limits were included in the calculations to allow the largest possible number of conformers to fit the experimental data. Backbone dihedral angle restraints were inferred from  $^3J_{\text{NH-CH}\alpha}$  coupling constants in 1D spectra,  $\phi$  was restrained to  $-65 \pm 30^\circ$  for  $^3J_{\text{NH-CH}\alpha} \leq 6\text{Hz}$  and to  $-120 \pm 30^\circ$  for  $^3J_{\text{NH-CH}\alpha} \geq 8\text{Hz}$ . There was clearly no evidence at all for *cis*-amides about peptide bonds (i.e. no CH $\alpha$ -CH $\alpha$  (*i, i+1*) ROEs) in the ROESY spectra so all  $\psi$ -angles were set to *trans* ( $\psi = 180^\circ$ ). Starting structures with randomised  $\phi$  and  $\psi$  angles and extended side chains were generated using an *ab initio* simulated annealing protocol. The calculations were performed using the standard forcefield parameter set (PARALLHDG5.2.PRO) and topology file (TOPALLHDG5.2.PRO) in XPLOR-NIH with in house modifications to generated lactam bridges Lys/Orn/Dab/Dap and Asp/Glu residues. Refinement of structures was achieved using the conjugate gradient Powell algorithm with 4000 cycles of energy minimisation and a refined forcefield based on the program CHARMM (Brooks, B. R.; Bruccoleri, R. E.; Olafson, B. D.; States, D. J.; Swaminathan, S.; Karplus, M. *J. Comput. Chem.* **1983**, 4, 187). Structures were visualised with Pymol and analysed for distance ( $> 0.2\text{\AA}$ ) and dihedral angle ( $> 5^\circ$ ) violations using noe.inp files. Final structures contained no distance violations ( $> 0.2\text{\AA}$ ) or angle violations ( $> 5^\circ$ ).

## 6. Molecular Dynamics

All simulations were performed using Maetro simulation package. The force field topologies of the cyclic tetrapeptides were derived from the OPSL\_2005 parameter set. The cyclic peptide was placed in a pre-equilibrated truncated octahedral box filled with 1038 SPC water molecules. The simulation was carried out at 298 K. After a steepest descent minimization step, the cyclic peptides were subjected to 100 ps of simulation with position restraints on the peptide to relax the solvent. The systems were subsequently equilibrated for 1 ns without restraints. The simulations were performed at constant temperature (298 K) and pressure (1 atm). This was achieved using a Berendsen thermostat with a coupling time of 0.1 ps and a Berendsen barostat with a coupling time of 0.5 ps. Nonbonded interactions were calculated using a twin-range cut-off. Interactions within the short-

range cut-off of 0.8 nm were updated every time step. Interactions within the longer-range cut-off of 1.4 nm were updated every 5 time steps together with the pairlist. All bonds were constrained using the SHAKE algorithm with a geometric tolerance of 0.0001. Initial velocities were taken from the Maxwell-Boltzmann distribution at 298 K and were acquired for 50 ns. Backbone ( $C\alpha$ ) atom-positional RMSD values were calculated after translational superposition of centres of mass and least-squares rotational fitting of atomic positions.



Table S1.  $\phi$ ,  $\psi$  angles for idealized  $\alpha$ -turns.

| $\alpha$ -turn types | $\phi(i+1)^\circ$ | $\psi(i+1)^\circ$ | $\phi(i+2)^\circ$ | $\psi(i+2)^\circ$ | $\phi(i+3)^\circ$ | $\psi(i+3)^\circ$ |
|----------------------|-------------------|-------------------|-------------------|-------------------|-------------------|-------------------|
| 0- $\alpha_{RS}^a$   | -58               | -47               | -58               | -47               | -58               | -47               |
| 0- $\alpha_{LS}^a$   | 58                | 47                | 58                | 47                | 58                | 47                |
| 3 <sub>10</sub> -RS  | -60               | -30               | -60               | -30               | -60               | -30               |
| 3 <sub>10</sub> -LS  | 60                | 30                | 60                | 30                | 60                | 30                |
| I- $\alpha_{RS}$     | -60 $\pm$ 11      | -29 $\pm$ 13      | -72 $\pm$ 14      | -29 $\pm$ 15      | -96 $\pm$ 20      | -20 $\pm$ 17      |
| I- $\alpha_{LS}$     | 48 $\pm$ 22       | 42 $\pm$ 14       | 67 $\pm$ 9        | 33 $\pm$ 14       | 70 $\pm$ 11       | 32 $\pm$ 12       |
| II- $\alpha_{RS}$    | -59 $\pm$ 10      | 129 $\pm$ 15      | 88 $\pm$ 15       | -16 $\pm$ 19      | -91 $\pm$ 22      | -32 $\pm$ 18      |
| II- $\alpha_{LS}$    | 53 $\pm$ 15       | -137 $\pm$ 25     | -95 $\pm$ 12      | 81 $\pm$ 23       | 57 $\pm$ 5        | 38 $\pm$ 8        |
| I- $\alpha_{RU}$     | 59 $\pm$ 18       | -157 $\pm$ 31     | -67 $\pm$ 17      | -29 $\pm$ 20      | -68 $\pm$ 12      | -39 $\pm$ 12      |
| I- $\alpha_{LU}$     | -61 $\pm$ 12      | 158 $\pm$ 15      | 64 $\pm$ 17       | 37 $\pm$ 21       | 62 $\pm$ 12       | 39 $\pm$ 8        |
| II- $\alpha_{RU}$    | 54 $\pm$ 8        | 39 $\pm$ 15       | 67 $\pm$ 13       | -5 $\pm$ 31       | -125 $\pm$ 11     | -34 $\pm$ 32      |
| II- $\alpha_{LU}$    | -65 $\pm$ 15      | -20 $\pm$ 15      | -90 $\pm$ 17      | 16 $\pm$ 44       | 86 $\pm$ 18       | 37 $\pm$ 27       |
| I- $\alpha_C$        | -103 $\pm$ 23     | 14 $\pm$ 34       | -85 $\pm$ 8       | 2 $\pm$ 6         | -54 $\pm$ 6       | -39 $\pm$ 9       |

<sup>a</sup> 0- $\alpha_{RS}$  and 0- $\alpha_{LS}$  are classical  $\alpha$ -turns from  $\alpha$ -helix; 3<sub>10</sub>-RS and 3<sub>10</sub>-LS are classical 3<sub>10</sub>-turns from 3<sub>10</sub>-helix; 9 other  $\alpha$ -turn types [V. Pavone, G. Gaeta, A. Lombardi, F. Nastri, O. Maglio, C. Isernia, M. Saviano, *Biopolymers* **1996**, 38, 705 - 721.]

Table S2.  $\phi$ ,  $\psi$  angles for  $\beta$ -turns.

| $\beta$ -turn types | $\phi(i+1)^\circ$ | $\psi(i+1)^\circ$ | $\phi(i+2)^\circ$ | $\psi(i+2)^\circ$ |
|---------------------|-------------------|-------------------|-------------------|-------------------|
| $\beta$ -I          | -60               | -30               | -90               | 0                 |
| $\beta$ -I'         | 60                | 30                | 90                | 0                 |
| $\beta$ -II         | -60               | 120               | 80                | 0                 |
| $\beta$ -II'        | -60               | -120              | -80               | 0                 |
| $\beta$ -III        | -60               | -30               | -60               | -30               |
| $\beta$ -III'       | 60                | 30                | 60                | 30                |
| $\beta$ -VIa1       | -60               | 120               | -90               | 0                 |
| $\beta$ -VIa2       | -120              | 120               | -60               | 0                 |
| $\beta$ -VIb        | -135              | 135               | -75               | 160               |
| $\beta$ -VIII       | -60               | -30               | -120              | 120               |
| $\beta$ -IV         | -60               | 10                | -50               | 20                |
| $\gamma$ -Classic   | 70 to 85          | -60 to -70        |                   |                   |
| $\gamma$ -Inverse   | -70 to -85        | 60 to 70          |                   |                   |

**Table S3.** Cyclic tetrapeptides examined in this study.

| #  | Peptide <sup>[a]</sup>                     | Ring Size |
|----|--------------------------------------------|-----------|
| 1  | Ac-(cyclo-1,4)-[DapAAD]-NH <sub>2</sub>    | 14        |
| 2  | Ac-(cyclo-1,4)-[DabAAD]-NH <sub>2</sub>    | 15        |
| 3  | Ac-(cyclo-1,4)-[OAAAD]-NH <sub>2</sub>     | 16        |
| 4  | Ac-(cyclo-1,4)-[KAAAD]-NH <sub>2</sub>     | 17        |
| 5  | Ac-(cyclo-1,4)-[DAADap]-NH <sub>2</sub>    | 14        |
| 6  | Ac-(cyclo-1,4)-[DAADab]-NH <sub>2</sub>    | 15        |
| 7  | Ac-(cyclo-1,4)-[DAAO]-NH <sub>2</sub>      | 16        |
| 8  | Ac-(cyclo-1,4)-[DAAK]-NH <sub>2</sub>      | 17        |
| 9  | Ac-(cyclo-1,4)-[DapAAE]-NH <sub>2</sub>    | 15        |
| 10 | Ac-(cyclo-1,4)-[DabAAE]-NH <sub>2</sub>    | 16        |
| 11 | Ac-(cyclo-1,4)-[OAAE]-NH <sub>2</sub>      | 17        |
| 12 | Ac-(cyclo-1,4)-[KAAE]-NH <sub>2</sub>      | 18        |
| 13 | Ac-(cyclo-1,4)-[EAADap]-NH <sub>2</sub>    | 15        |
| 14 | Ac-(cyclo-1,4)-[EAADab]-NH <sub>2</sub>    | 16        |
| 15 | Ac-(cyclo-1,4)-[EAAO]-NH <sub>2</sub>      | 17        |
| 16 | Ac-(cyclo-1,4)-[EAAK]-NH <sub>2</sub>      | 18        |
| 17 | Ac-(cyclo-1,4)-[dAADap]-NH <sub>2</sub>    | 14        |
| 18 | Ac-(cyclo-1,4)-[eAADap]-NH <sub>2</sub>    | 15        |
| 19 | Ac-(cyclo-1,4)-[dAADab]-NH <sub>2</sub>    | 15        |
| 20 | Ac-(cyclo-1,4)-[dAAO]-NH <sub>2</sub>      | 16        |
| 21 | Ac-(cyclo-1,4)-[IsoDAADap]-NH <sub>2</sub> | 14        |
| 22 | Ac-(cyclo-1,4)-[IsodAADap]-NH <sub>2</sub> | 14        |
| 23 | (cyclo-1,4)-[SuccAADap]-NH <sub>2</sub>    | 14        |
| 24 | (cyclo-1,4)-[GlutAADap]-NH <sub>2</sub>    | 15        |
| 25 | Ac-(cyclo-1,5)-[KAAAD]-NH <sub>2</sub>     | 20        |

<sup>[a]</sup> Dap = Diaminopropionic acid, Dab = Diaminobutyric acid, O = Ornithine, d = <sub>D</sub>-Asp, e = <sub>D</sub>-Glu, Isod = <sub>D</sub>-IsoAsp, Succ = Succinic acid, Glut = Glutaric acid.

**Table S4.** Peptide characterization data

| #  | Peptide                                    | Formula                                                                         | [MH] <sup>+</sup><br>calculated | [M+XH] <sup>+</sup><br>observed<br>(HRMS) | R <sub>t</sub> (min) /<br>(Method) |
|----|--------------------------------------------|---------------------------------------------------------------------------------|---------------------------------|-------------------------------------------|------------------------------------|
| 1  | Ac-(cyclo-1,4)-[DapAAD]-NH <sub>2</sub>    | C <sub>15</sub> H <sub>25</sub> N <sub>6</sub> O <sub>6</sub> + Na <sup>+</sup> | 407.1650                        | 407.1645                                  | 2.0 (D)                            |
| 2  | Ac-(cyclo-1,4)-[DabAAD]-NH <sub>2</sub>    | C <sub>16</sub> H <sub>27</sub> N <sub>6</sub> O <sub>6</sub> <sup>+</sup>      | 399.1987                        | 399.1987                                  | 11.7 (B)                           |
| 3  | Ac-(cyclo-1,4)-[OAAD]-NH <sub>2</sub>      | C <sub>17</sub> H <sub>29</sub> N <sub>6</sub> O <sub>6</sub> <sup>+</sup>      | 413.2143                        | 413.2147                                  | 11.9 (B)                           |
| 4  | Ac-(cyclo-1,4)-[KAAD]-NH <sub>2</sub>      | C <sub>18</sub> H <sub>31</sub> N <sub>6</sub> O <sub>6</sub> <sup>+</sup>      | 427.2300                        | 427.2303                                  | 12.1 (B)                           |
| 5  | Ac-(cyclo-1,4)-[DAADap]-NH <sub>2</sub>    | C <sub>15</sub> H <sub>25</sub> N <sub>6</sub> O <sub>6</sub> + Na <sup>+</sup> | 407.1650                        | 407.1649                                  | 2.1 (D)                            |
| 6  | Ac-(cyclo-1,4)-[DAADab]-NH <sub>2</sub>    | C <sub>16</sub> H <sub>27</sub> N <sub>6</sub> O <sub>6</sub> <sup>+</sup>      | 399.1987                        | 399.1986                                  | 12.1 (B)                           |
| 7  | Ac-(cyclo-1,4)-[DAAO]-NH <sub>2</sub>      | C <sub>17</sub> H <sub>29</sub> N <sub>6</sub> O <sub>6</sub> <sup>+</sup>      | 413.2143                        | 413.2147                                  | 12.2 (B)                           |
| 8  | Ac-(cyclo-1,4)-[DAAK]-NH <sub>2</sub>      | C <sub>18</sub> H <sub>31</sub> N <sub>6</sub> O <sub>6</sub> <sup>+</sup>      | 427.2300                        | 427.2300                                  | 7.7 (C)                            |
| 9  | Ac-(cyclo-1,4)-[DapAAE]-NH <sub>2</sub>    | C <sub>16</sub> H <sub>27</sub> N <sub>6</sub> O <sub>6</sub> + Na <sup>+</sup> | 421.1806                        | 421.1806                                  | 2.0 (D)                            |
| 10 | Ac-(cyclo-1,4)-[DabAAE]-NH <sub>2</sub>    | C <sub>17</sub> H <sub>29</sub> N <sub>6</sub> O <sub>6</sub> <sup>+</sup>      | 413.2143                        | 413.2142                                  | 12.0 (B)                           |
| 11 | Ac-(cyclo-1,4)-[OAAE]-NH <sub>2</sub>      | C <sub>18</sub> H <sub>31</sub> N <sub>6</sub> O <sub>6</sub> <sup>+</sup>      | 427.2300                        | 427.2307                                  | 6.8 (C)                            |
| 12 | Ac-(cyclo-1,4)-[KAAE]-NH <sub>2</sub>      | C <sub>19</sub> H <sub>33</sub> N <sub>6</sub> O <sub>6</sub> <sup>+</sup>      | 441.2456                        | 441.2453                                  | 7.1 (C)                            |
| 13 | Ac-(cyclo-1,4)-[EAADap]-NH <sub>2</sub>    | C <sub>16</sub> H <sub>27</sub> N <sub>6</sub> O <sub>6</sub> <sup>+</sup>      | 399.1987                        | 399.1987                                  | 2.1 (D)                            |
| 14 | Ac-(cyclo-1,4)-[EAADab]-NH <sub>2</sub>    | C <sub>17</sub> H <sub>29</sub> N <sub>6</sub> O <sub>6</sub> <sup>+</sup>      | 413.2143                        | 413.2143                                  | 12.0 (B)                           |
| 15 | Ac-(cyclo-1,4)-[EAAO]-NH <sub>2</sub>      | C <sub>18</sub> H <sub>31</sub> N <sub>6</sub> O <sub>6</sub> <sup>+</sup>      | 427.2300                        | 427.2300                                  | 5.9 (C)                            |
| 16 | Ac-(cyclo-1,4)-[EAAK]-NH <sub>2</sub>      | C <sub>19</sub> H <sub>33</sub> N <sub>6</sub> O <sub>6</sub> <sup>+</sup>      | 441.2456                        | 441.2456                                  | 12.2 (B)                           |
| 17 | Ac-(cyclo-1,4)-[dAADap]-NH <sub>2</sub>    | C <sub>15</sub> H <sub>25</sub> N <sub>6</sub> O <sub>6</sub> + Na <sup>+</sup> | 407.1650                        | 407.1650                                  | 2.1 (D)                            |
| 18 | Ac-(cyclo-1,4)-[eAADap]-NH <sub>2</sub>    | C <sub>16</sub> H <sub>27</sub> N <sub>6</sub> O <sub>6</sub> + Na <sup>+</sup> | 421.1806                        | 421.1807                                  | 2.2 (D)                            |
| 19 | Ac-(cyclo-1,4)-[dAADab]-NH <sub>2</sub>    | C <sub>16</sub> H <sub>27</sub> N <sub>6</sub> O <sub>6</sub> + Na <sup>+</sup> | 421.1806                        | 421.1808                                  | 2.1 (D)                            |
| 20 | Ac-(cyclo-1,4)-[dAAO]-NH <sub>2</sub>      | C <sub>17</sub> H <sub>29</sub> N <sub>6</sub> O <sub>6</sub> <sup>+</sup>      | 413.2143                        | 413.2140                                  | 2.0 (D)                            |
| 21 | Ac-(cyclo-1,4)-[IsoDAADap]-NH <sub>2</sub> | C <sub>15</sub> H <sub>24</sub> N <sub>6</sub> O <sub>6</sub> <sup>+</sup>      | 385.1830                        | 385.1826                                  | 8.0 (C)                            |
| 22 | Ac-(cyclo-1,4)-[IsodAADap]-NH <sub>2</sub> | C <sub>15</sub> H <sub>24</sub> N <sub>6</sub> O <sub>6</sub> <sup>+</sup>      | 385.1830                        | 385.1831                                  | 7.9 (C)                            |
| 23 | (cyclo-1,4)-[SuccAADap]-NH <sub>2</sub>    | C <sub>13</sub> H <sub>22</sub> N <sub>5</sub> O <sub>5</sub> <sup>+</sup>      | 328.1621                        | 328.1626                                  | 7.8 (C)                            |
| 24 | (cyclo-1,4)-[GlutAADap]-NH <sub>2</sub>    | C <sub>14</sub> H <sub>24</sub> N <sub>5</sub> O <sub>5</sub> <sup>+</sup>      | 342.1772                        | 342.1774                                  | 8.28 (C)                           |

|    | Peptide                                                       | Formula                                                                        | [MH] <sup>+</sup><br>calculated | [M+XH] <sup>+</sup><br>observed | R <sub>t</sub> (min) /<br>(Method) |
|----|---------------------------------------------------------------|--------------------------------------------------------------------------------|---------------------------------|---------------------------------|------------------------------------|
| 27 | Ac-(cyclo-1,4)-[DAADap](ARL) <sub>3</sub> -NH <sub>2</sub>    | C <sub>60</sub> H <sub>111</sub> N <sub>24</sub> O <sub>15</sub> <sup>3+</sup> | 469.28                          | 469.41<br>628.51                | 2.74 (D)                           |
| 28 | Ac-(cyclo-1,4)-[DAADab](ARL) <sub>3</sub> -NH <sub>2</sub>    | C <sub>61</sub> H <sub>113</sub> N <sub>24</sub> O <sub>15</sub> <sup>3+</sup> | 473.96                          | 473.96<br>710.45                | 2.93 (D)                           |
| 29 | Ac-(cyclo-1,4)-[DAAO](ARL) <sub>3</sub> -NH <sub>2</sub>      | C <sub>62</sub> H <sub>115</sub> N <sub>24</sub> O <sub>15</sub> <sup>3+</sup> | 478.63                          | 478.21                          | 2.78 (D)                           |
| 30 | Ac-(cyclo-1,4)-[DapAAE](ARL) <sub>3</sub> -NH <sub>2</sub>    | C <sub>61</sub> H <sub>113</sub> N <sub>24</sub> O <sub>15</sub> <sup>3+</sup> | 474.24                          | 474.21                          | 2.74 (D)                           |
| 31 | Ac-(cyclo-1,4)-[EAADap](ARL) <sub>3</sub> -NH <sub>2</sub>    | C <sub>61</sub> H <sub>113</sub> N <sub>24</sub> O <sub>15</sub> <sup>3+</sup> | 474.24                          | 474.24                          | 2.81 (D)                           |
| 32 | Ac-(cyclo-1,4)-[EAAO](ARL) <sub>3</sub> -NH <sub>2</sub>      | C <sub>63</sub> H <sub>117</sub> N <sub>24</sub> O <sub>15</sub> <sup>3+</sup> | 483.30                          | 483.81                          | 2.80 (D)                           |
| 33 | Ac-(cyclo-1,4)-[dAADap](ARL) <sub>3</sub> -NH <sub>2</sub>    | C <sub>60</sub> H <sub>111</sub> N <sub>24</sub> O <sub>15</sub> <sup>3+</sup> | 469.28                          | 469.33<br>703.67                | 2.48 (D)                           |
| 34 | Ac-(cyclo-1,4)-[eAADap](ARL) <sub>3</sub> -NH <sub>2</sub>    | C <sub>61</sub> H <sub>113</sub> N <sub>24</sub> O <sub>15</sub> <sup>3+</sup> | 474.24                          | 474.32                          | 2.71 (D)                           |
| 35 | Ac-(cyclo-1,4)-[dAAO](ARL) <sub>3</sub> -NH <sub>2</sub>      | C <sub>62</sub> H <sub>115</sub> N <sub>24</sub> O <sub>15</sub> <sup>3+</sup> | 478.63                          | 478.41                          | 2.80 (D)                           |
| 36 | Ac-(cyclo-1,4)-[isoDAADap](ARL) <sub>3</sub> -NH <sub>2</sub> | C <sub>60</sub> H <sub>111</sub> N <sub>24</sub> O <sub>15</sub> <sup>3+</sup> | 469.28                          | 469.32<br>703.67                | 2.55 (D)                           |
| 37 | Ac-(cyclo-1,4)-[isodAADap](ARL) <sub>3</sub> -NH <sub>2</sub> | C <sub>60</sub> H <sub>111</sub> N <sub>24</sub> O <sub>15</sub> <sup>3+</sup> | 469.28                          | 469.30<br>703.78                | 2.59 (D)                           |
| 38 | Ac-(cyclo-1,4)-[Succ-AAD](ARL) <sub>3</sub> -NH <sub>2</sub>  | C <sub>58</sub> H <sub>108</sub> N <sub>23</sub> O <sub>14</sub> <sup>3+</sup> | 450.28                          | 450.28<br>674.78                | 2.74 (D)                           |
| 39 | Ac-(cyclo-1,4)-[Glut-AAD](ARL) <sub>3</sub> -NH <sub>2</sub>  | C <sub>59</sub> H <sub>110</sub> N <sub>23</sub> O <sub>14</sub> <sup>3+</sup> | 448.95                          | 448.70<br>682.02                | 2.59 (D)                           |
| 40 | Ac-(cyclo-1,4)-[KAAAD](ARL) <sub>3</sub> -NH <sub>2</sub>     | C <sub>66</sub> H <sub>122</sub> N <sub>25</sub> O <sub>16</sub> <sup>3+</sup> | 506.98                          | 506.31                          | 2.67 (D)                           |

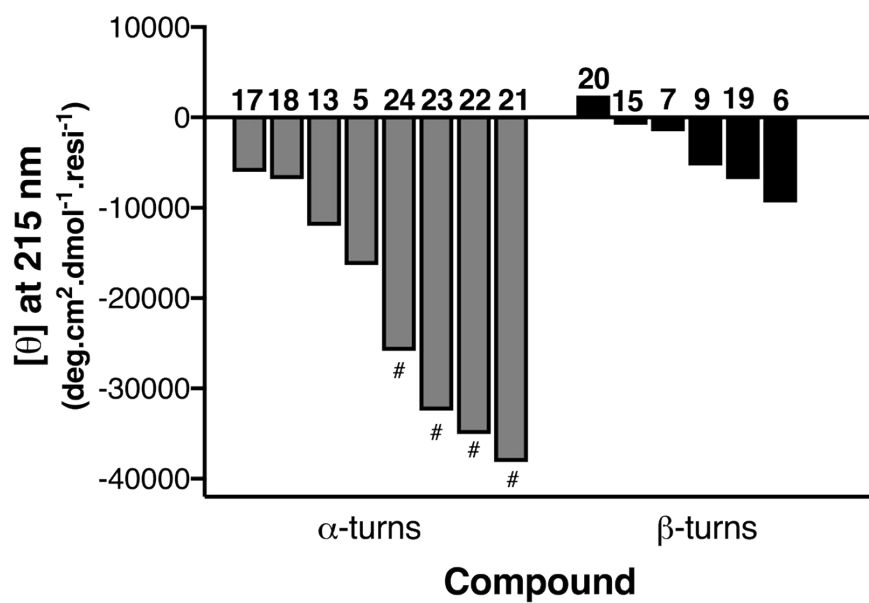

**Figure S1.** Molar ellipticity at  $\lambda = 215$  nm for compounds mimicking alpha turns (5, 13, 17, 21-24) versus beta turns (6, 7, 9, 15, 19, 20) showing stronger circular dichroism absorbance for the alpha turn than the beta turn at 215 nm. (#) Compounds where the N-terminal acetyl-cap has been moved or removed.

## 7. NMR Data

### 7.1 $^1\text{H}$ NMR Spectra in $\text{H}_2\text{O}:\text{D}_2\text{O}$ (9:1).

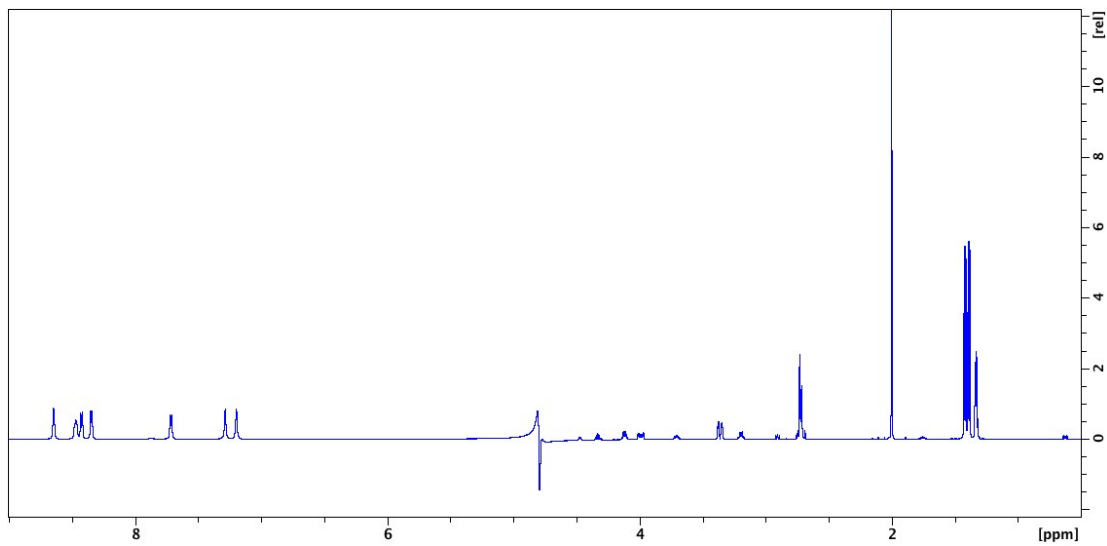

**Figure 1.** 600 MHz  $^1\text{H}$  NMR spectrum of Ac-cyclo-(1,4)-[DapAAD]-NH<sub>2</sub> (1).

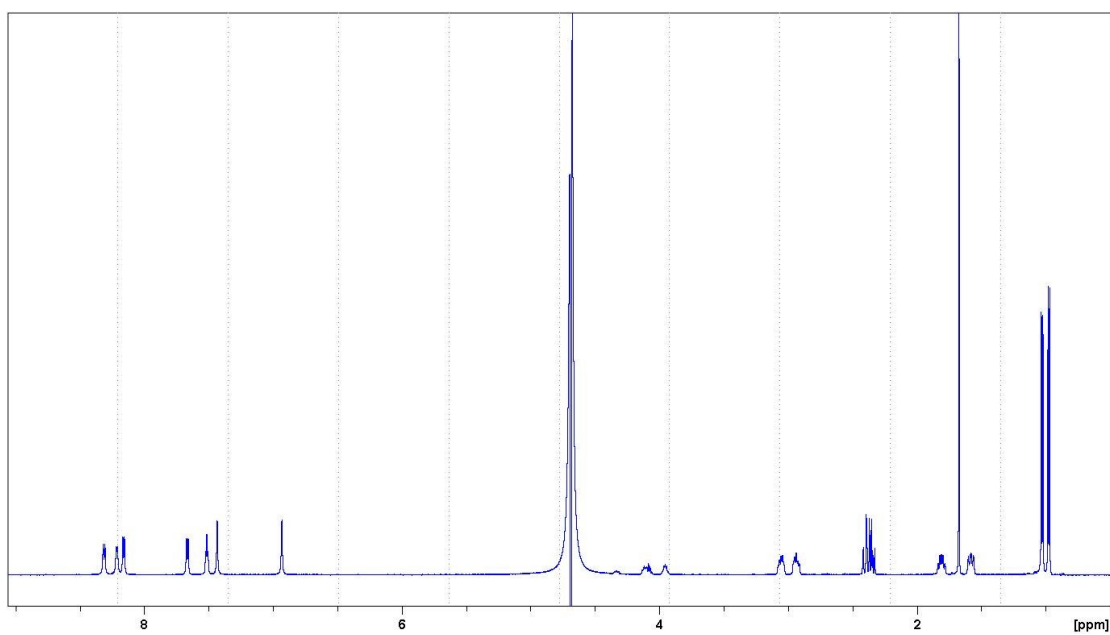

**Figure 2.** 600 MHz  $^1\text{H}$  NMR spectrum of Ac-cyclo-(1,4)-[DabAAD]-NH<sub>2</sub> (2).

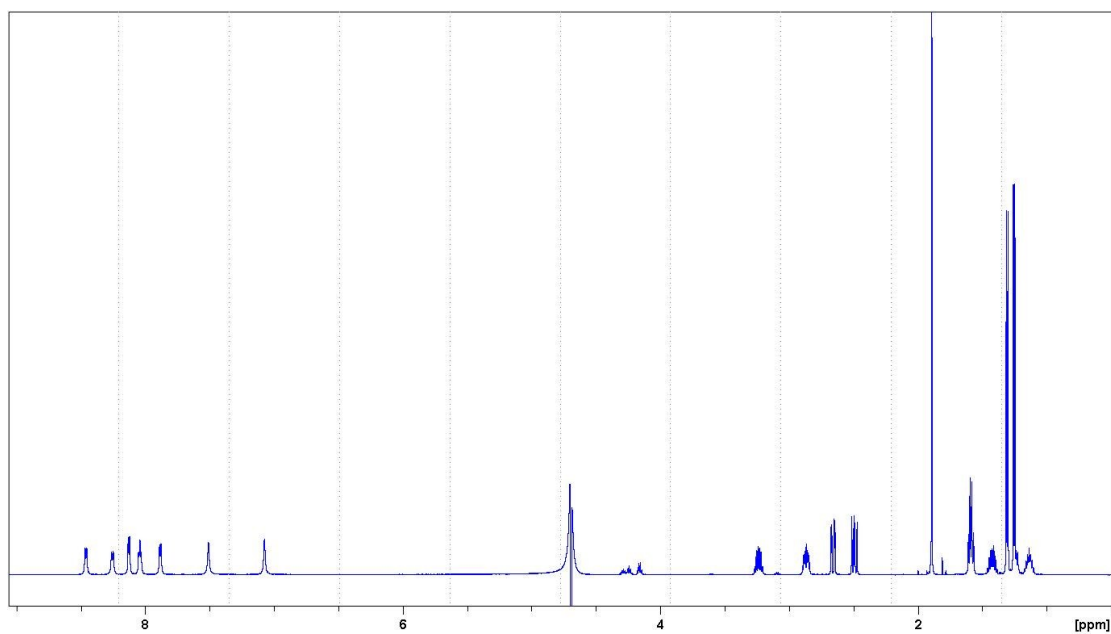

**Figure 3.** 600 MHz <sup>1</sup>H NMR spectrum of Ac-cyclo-(1,4)-[OAAD]-NH<sub>2</sub> (3).

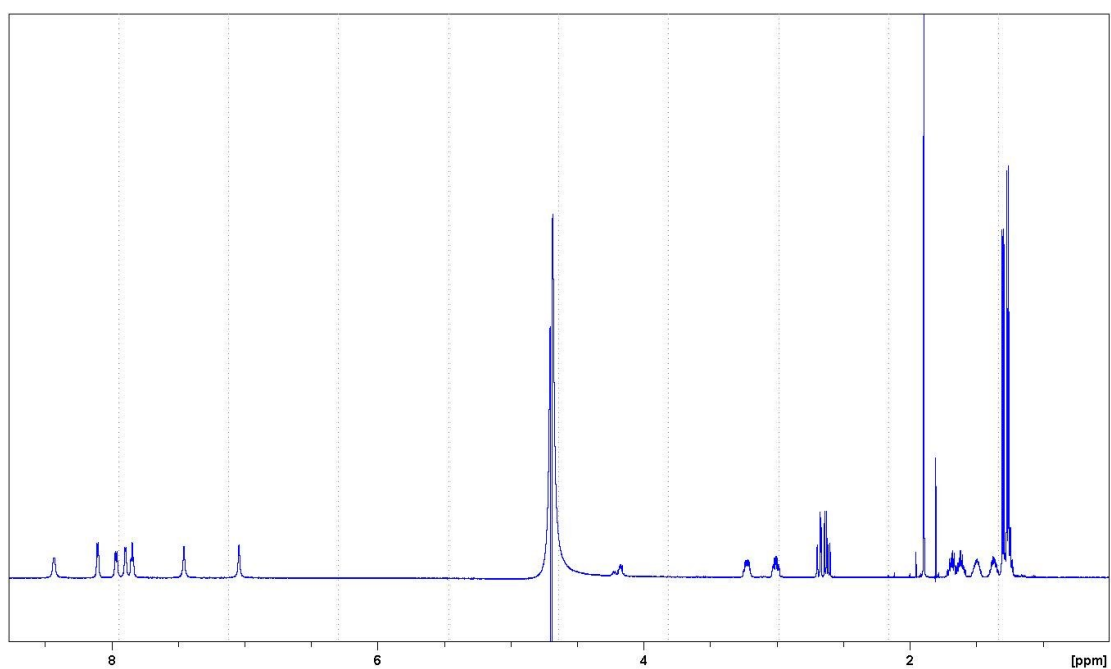

**Figure 4.** 600 MHz <sup>1</sup>H NMR spectrum of Ac-cyclo-(1,4)-[KAAD]-NH<sub>2</sub> (4).

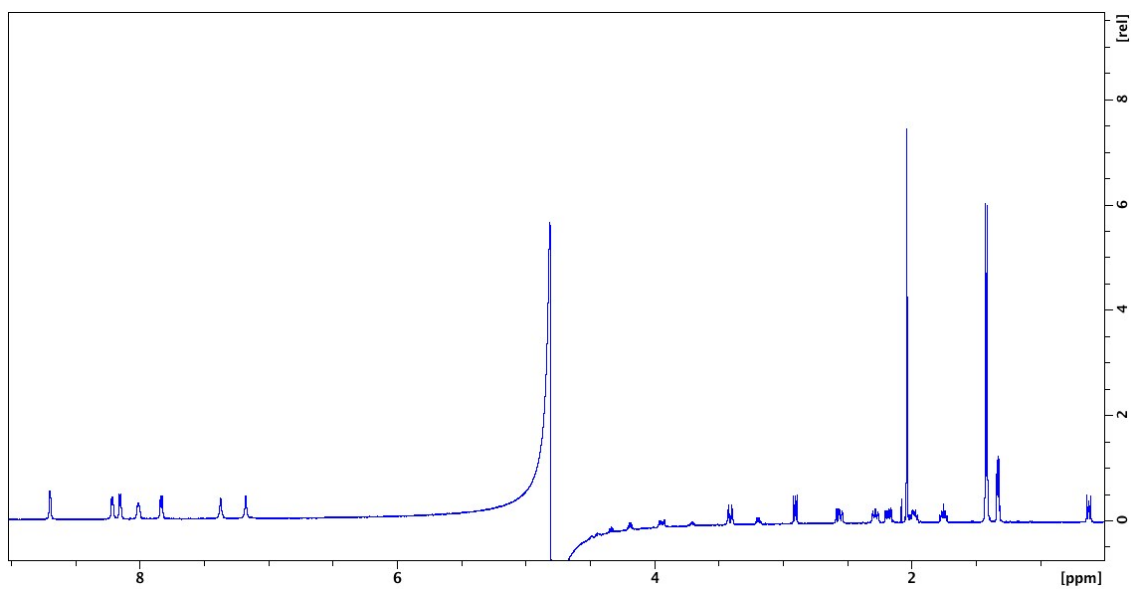

**Figure 5.** 600 MHz  $^1\text{H}$  NMR spectrum of Ac-cyclo-(1,4)-[DAADap]-NH<sub>2</sub> (**5**).

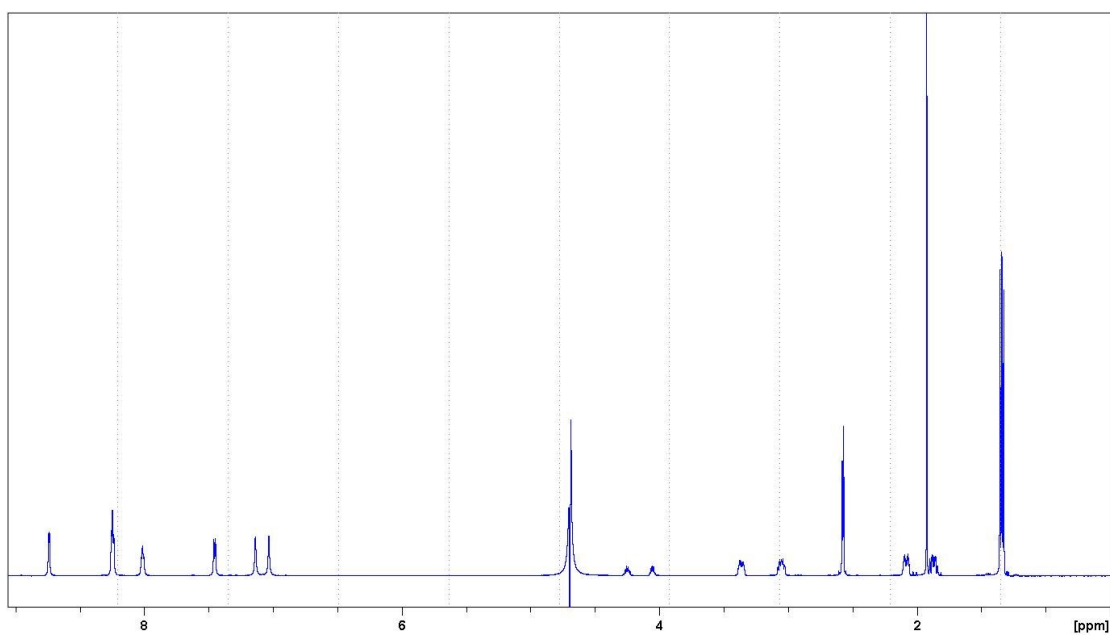

**Figure 6.** 600 MHz  $^1\text{H}$  NMR spectrum of Ac-cyclo-(1,4)-[DAADab]-NH<sub>2</sub> (**6**).

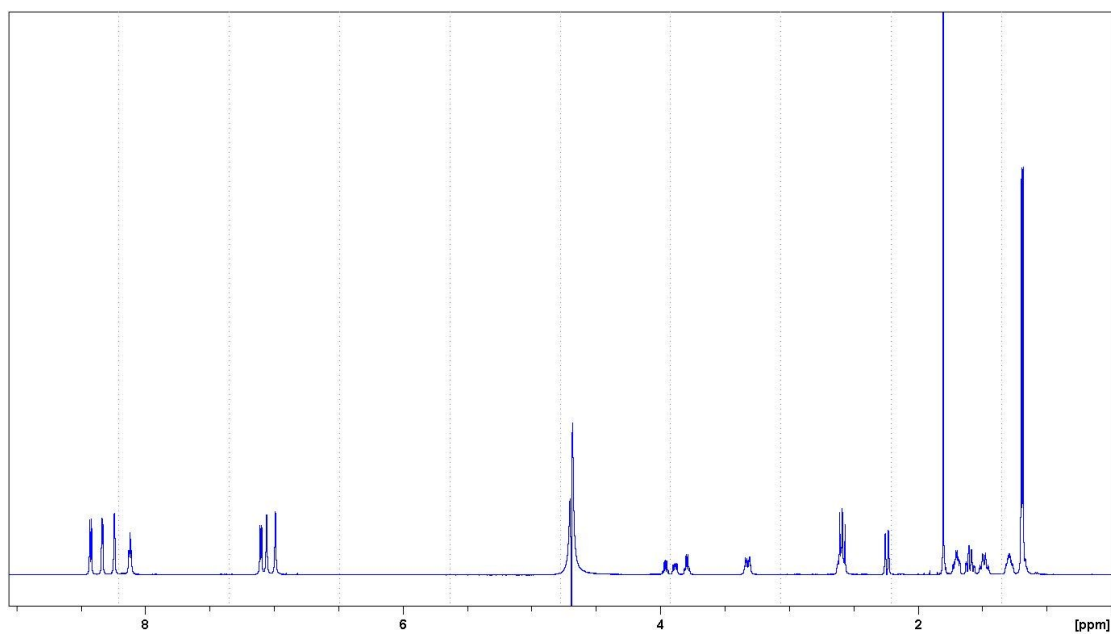

**Figure 7.** 600 MHz  $^1\text{H}$  NMR spectrum of Ac-cyclo-(1,4)-[DAAO]- $\text{NH}_2$  (**7**).

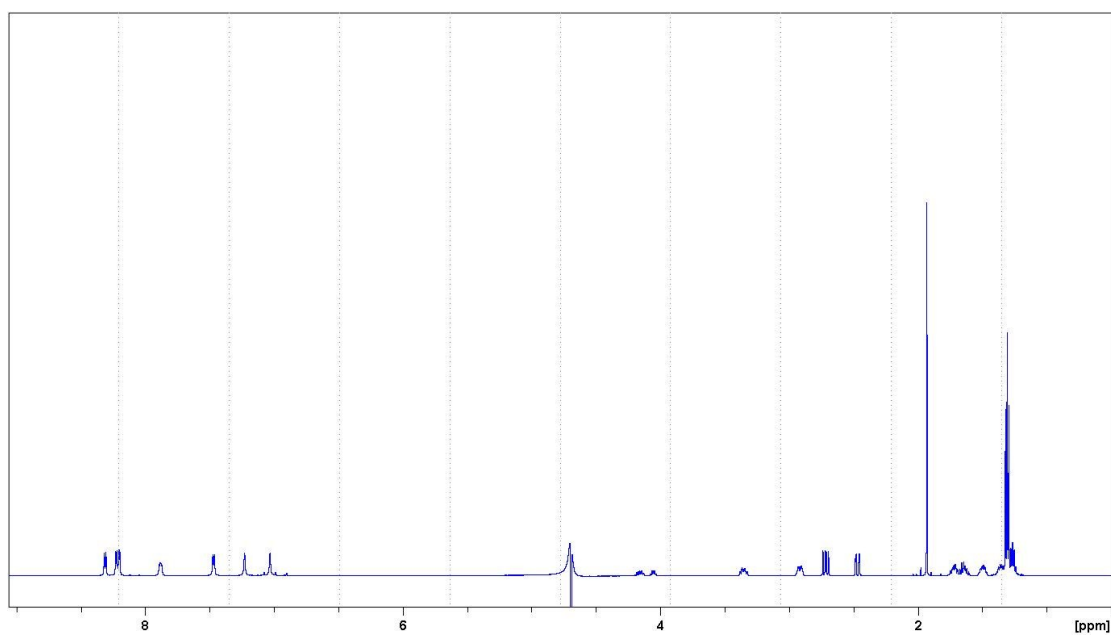

**Figure 8.** 600 MHz  $^1\text{H}$  NMR spectrum of Ac-cyclo-(1,4)-[DAAK]- $\text{NH}_2$  (**8**).



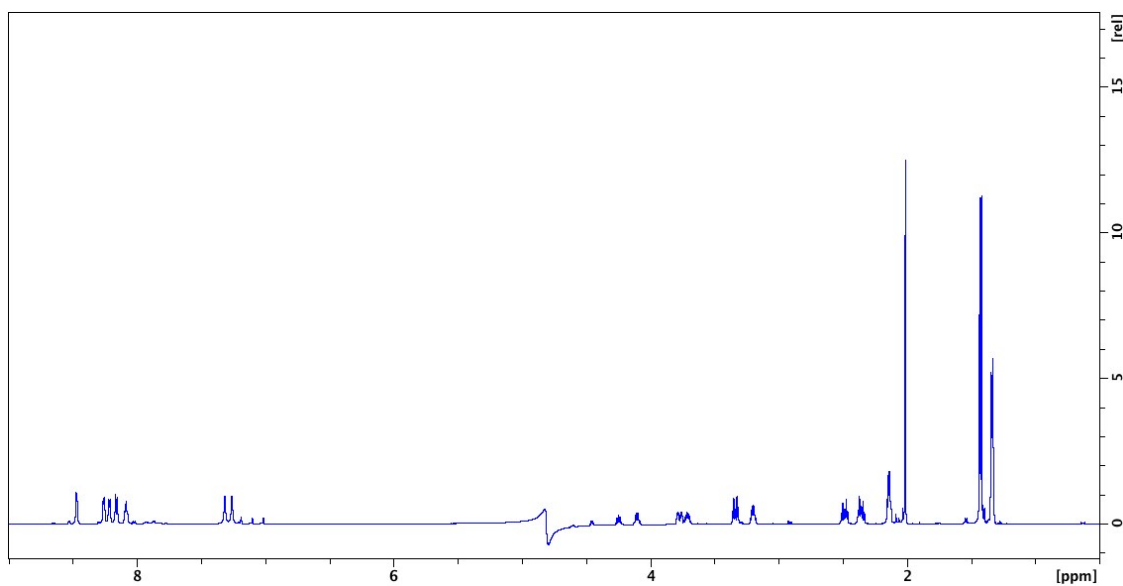

**Figure 9.** 600 MHz  $^1\text{H}$  NMR spectrum of Ac-cyclo-(1,4)-[DapAAE]-NH<sub>2</sub> (9).

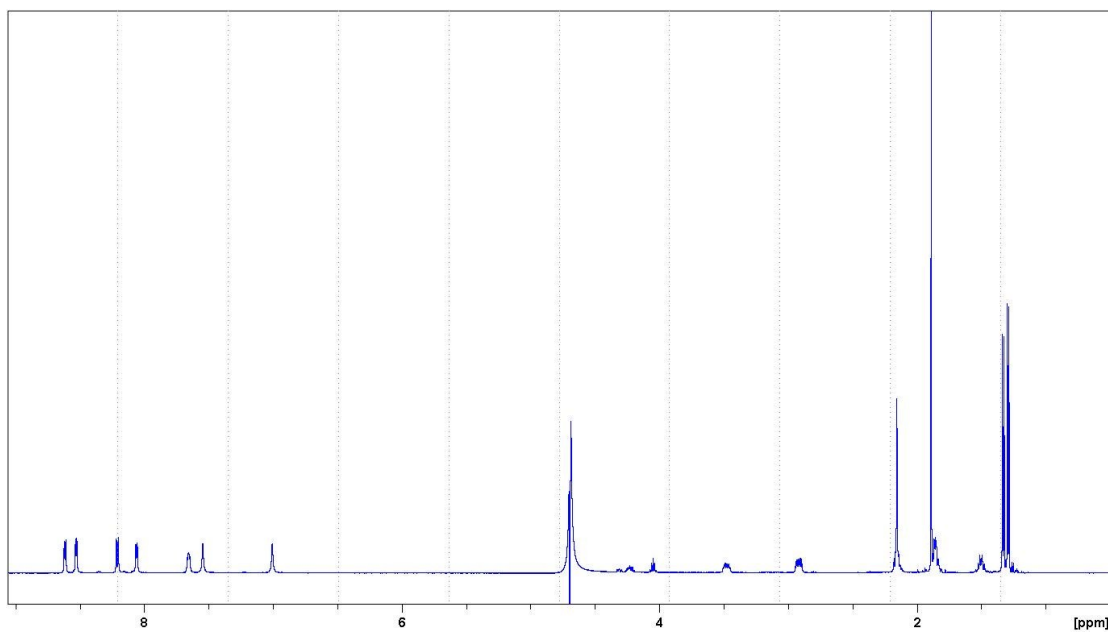

**Figure 10.** 600 MHz  $^1\text{H}$  NMR spectrum of Ac-cyclo-(1,4)-[DabAAE]-NH<sub>2</sub> (10).

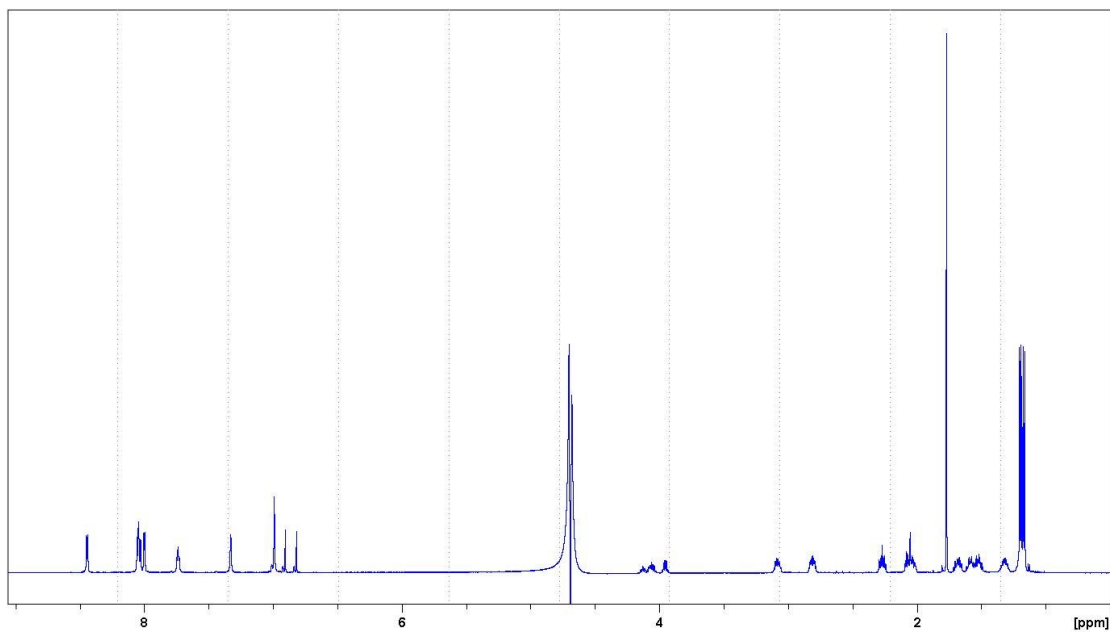

**Figure 11.** 600 MHz <sup>1</sup>H NMR spectrum of Ac-cyclo-(1,4)-[OAAE]-NH<sub>2</sub> (11).

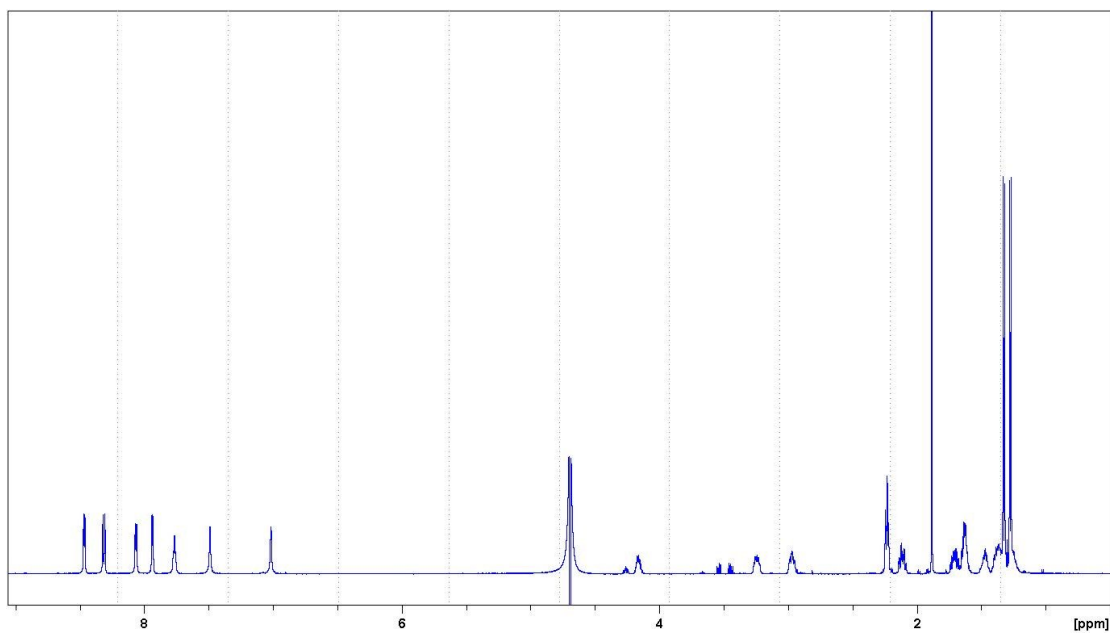

**Figure 12.** 600 MHz <sup>1</sup>H NMR spectrum of Ac-cyclo-(1,4)-[KAAE]-NH<sub>2</sub> (12).

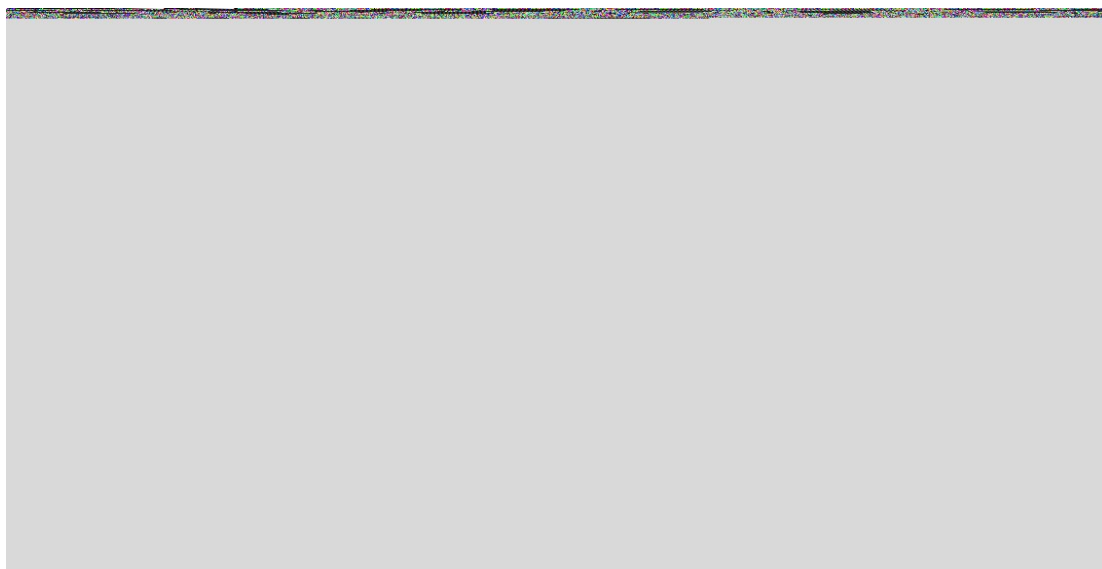

**Figure 13.** 600 MHz <sup>1</sup>H NMR spectrum of Ac-cyclo-(1,4)-[EAADab]-NH<sub>2</sub> (**13**).

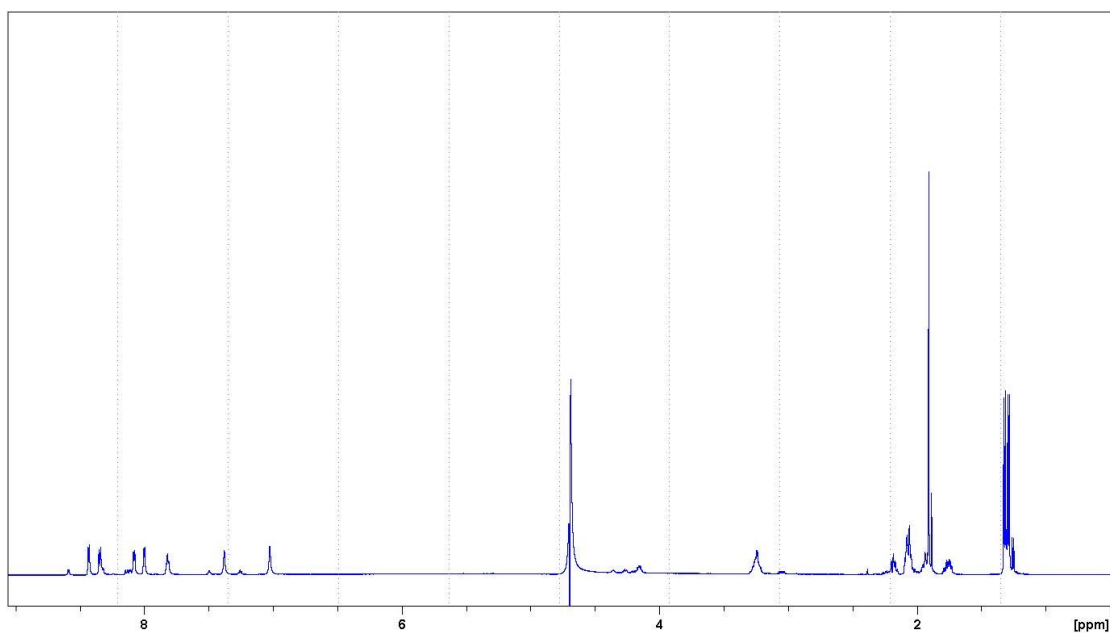

**Figure 14.** 600 MHz <sup>1</sup>H NMR spectrum of Ac-cyclo-(1,4)-[EAADab]-NH<sub>2</sub> (**14**).

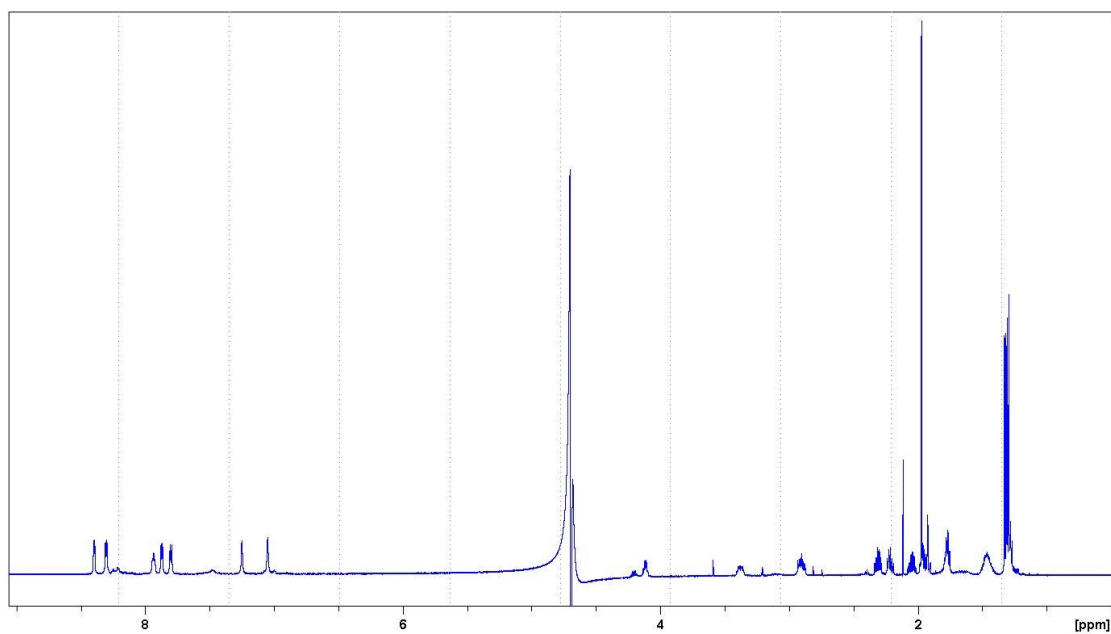

**Figure 15.** 600 MHz  $^1\text{H}$  NMR spectrum of Ac-cyclo-(1,4)-[EAAO]-NH<sub>2</sub> (15).

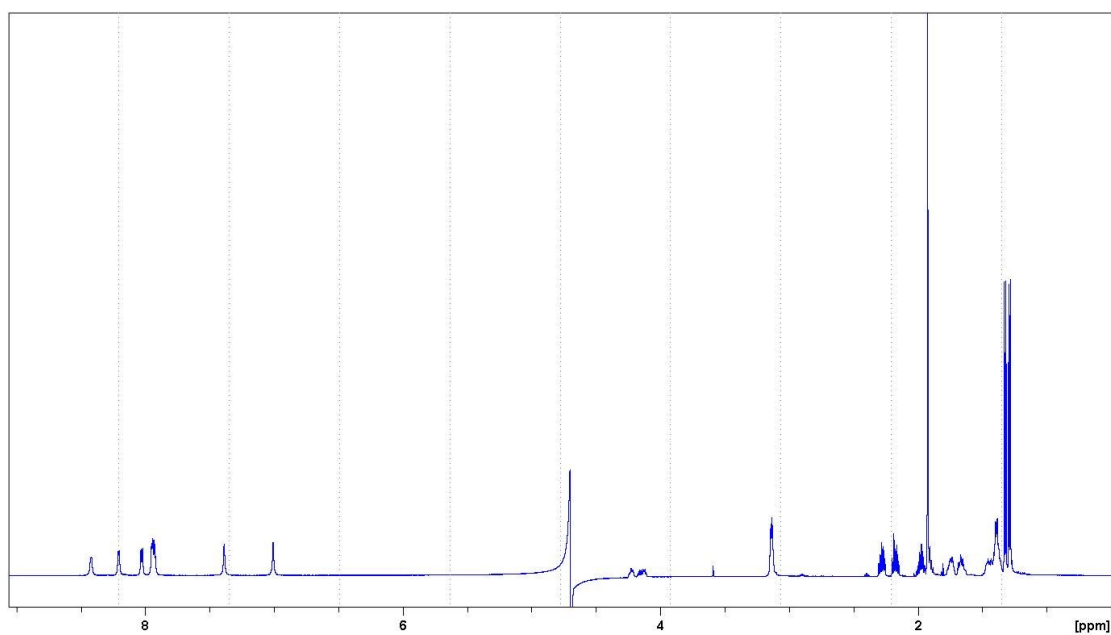

**Figure 16.** 600 MHz  $^1\text{H}$  NMR spectrum of Ac-cyclo-(1,4)-[EAAK]-NH<sub>2</sub> (16).

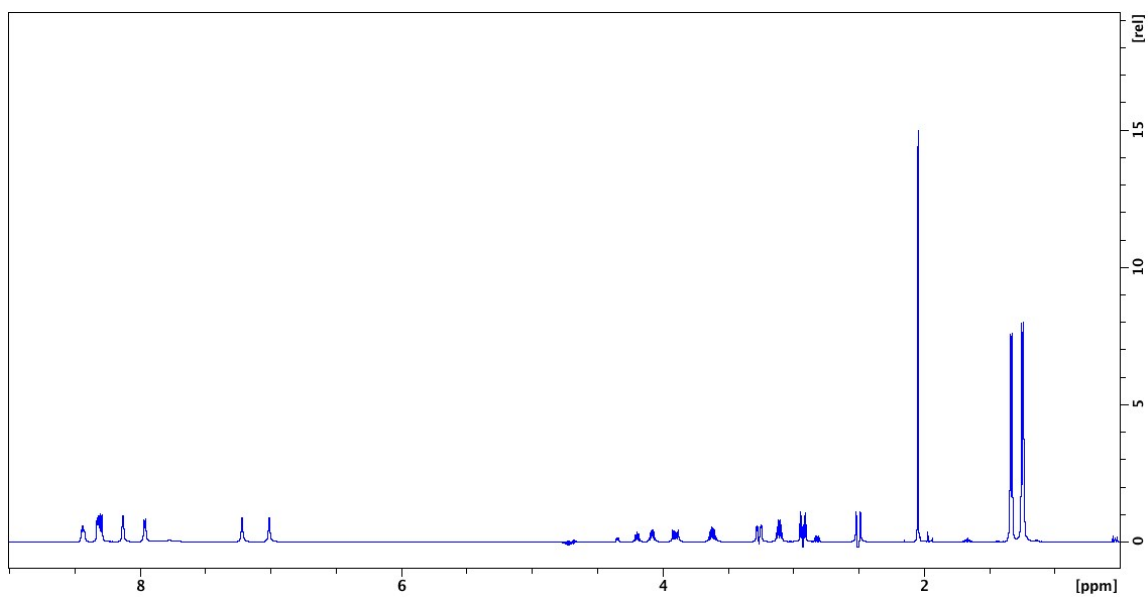

**Figure 17.** 600 MHz  $^1\text{H}$  NMR spectrum of Ac-cyclo-(1,4)-[dAADap]-NH<sub>2</sub> (17).

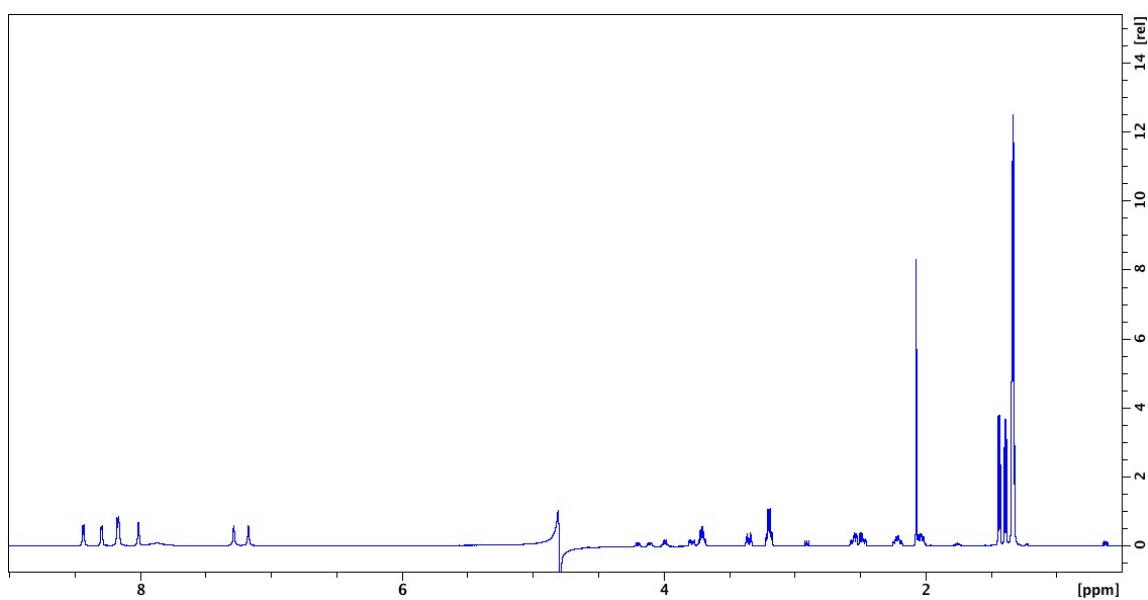

**Figure 18.** 600 MHz  $^1\text{H}$  NMR spectrum of Ac-cyclo-(1,4)-[eAADap]-NH<sub>2</sub> (18).

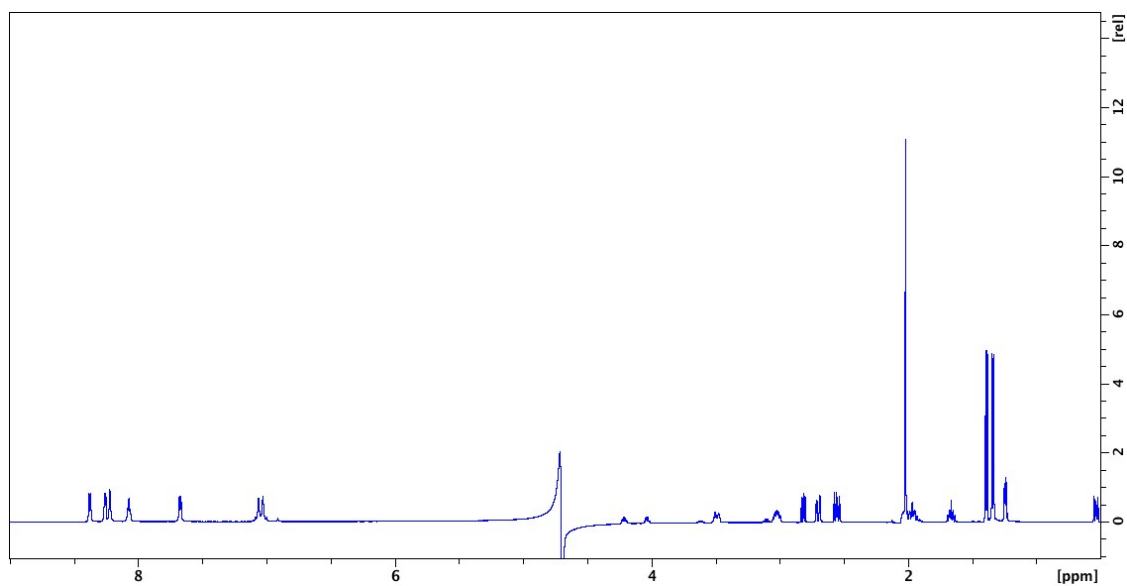

**Figure 19.** 600 MHz  $^1\text{H}$  NMR spectrum of Ac-cyclo-(1,4)-[dAADab]-NH<sub>2</sub> (19).

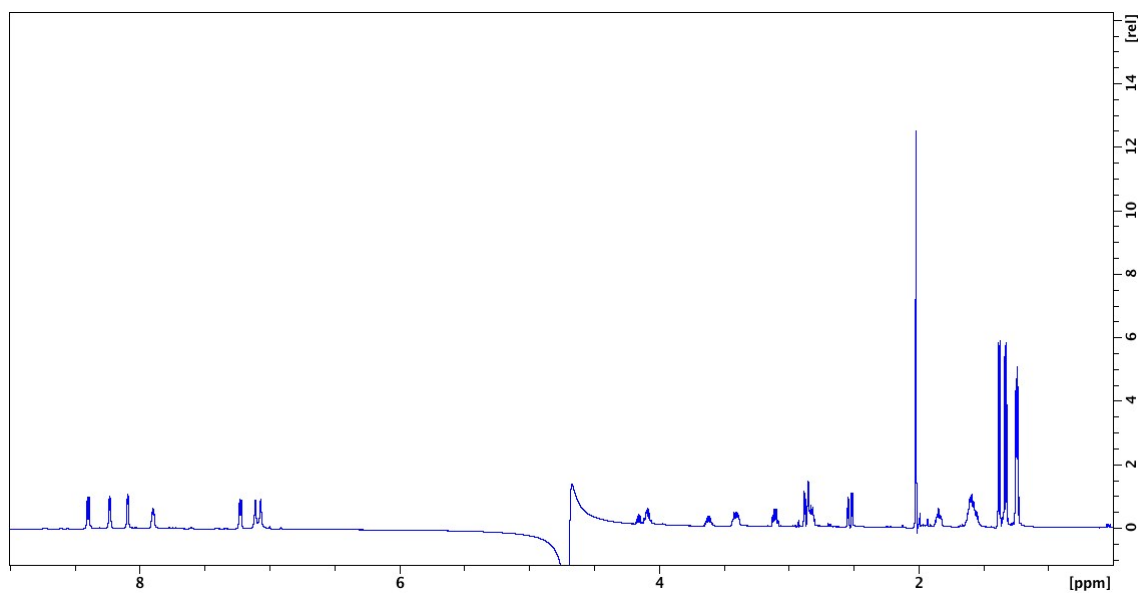

**Figure 20.** 600 MHz  $^1\text{H}$  NMR spectrum of Ac-cyclo-(1,4)-[dAAO]-NH<sub>2</sub> (20).

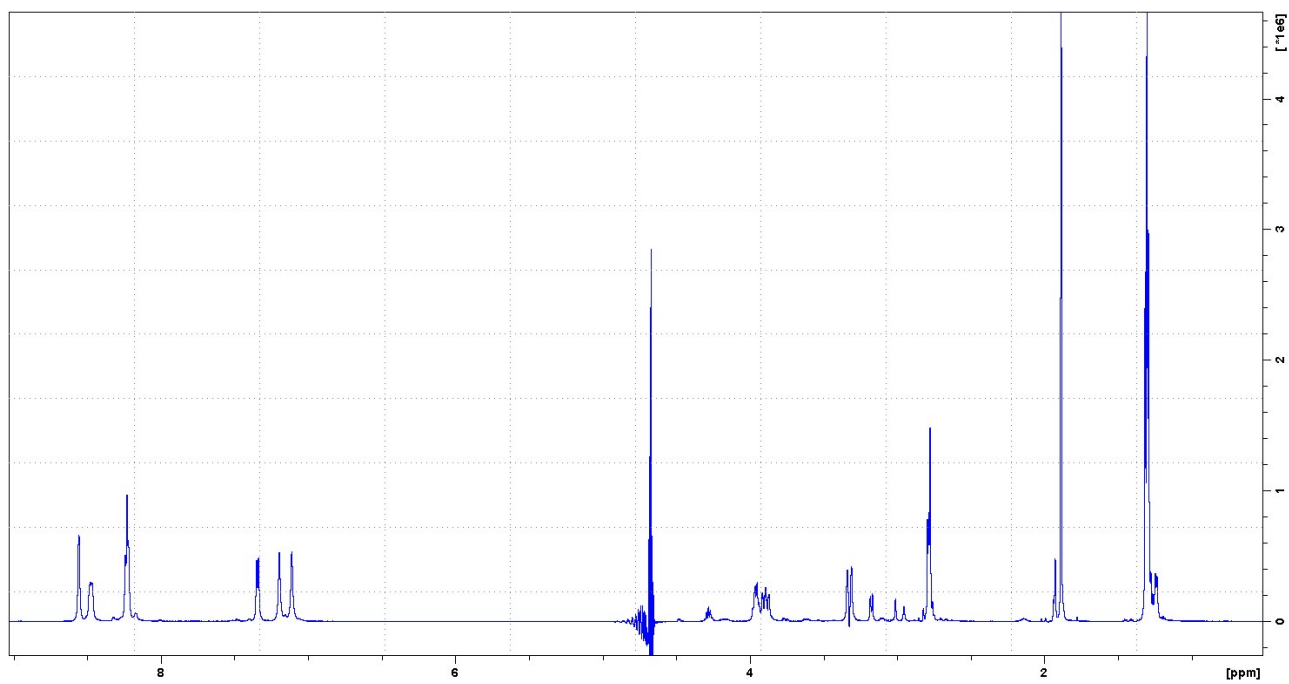

**Figure 21.** 600 MHz  $^1\text{H}$  NMR spectrum of Ac-cyclo-(1,4)-[IsoDAADap]-NH<sub>2</sub> (21) .

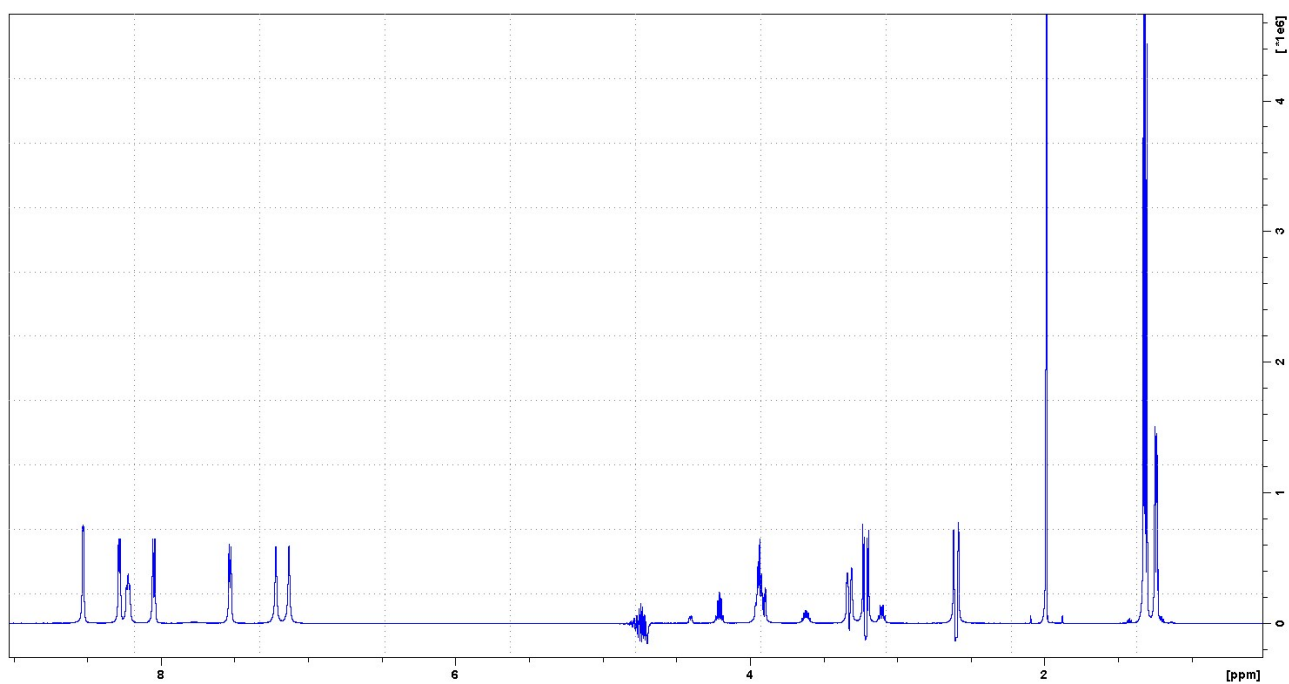

**Figure 22.** 600 MHz  $^1\text{H}$  NMR spectrum of Ac-cyclo-(1,4)-[IsodAADap]-NH<sub>2</sub> (22).

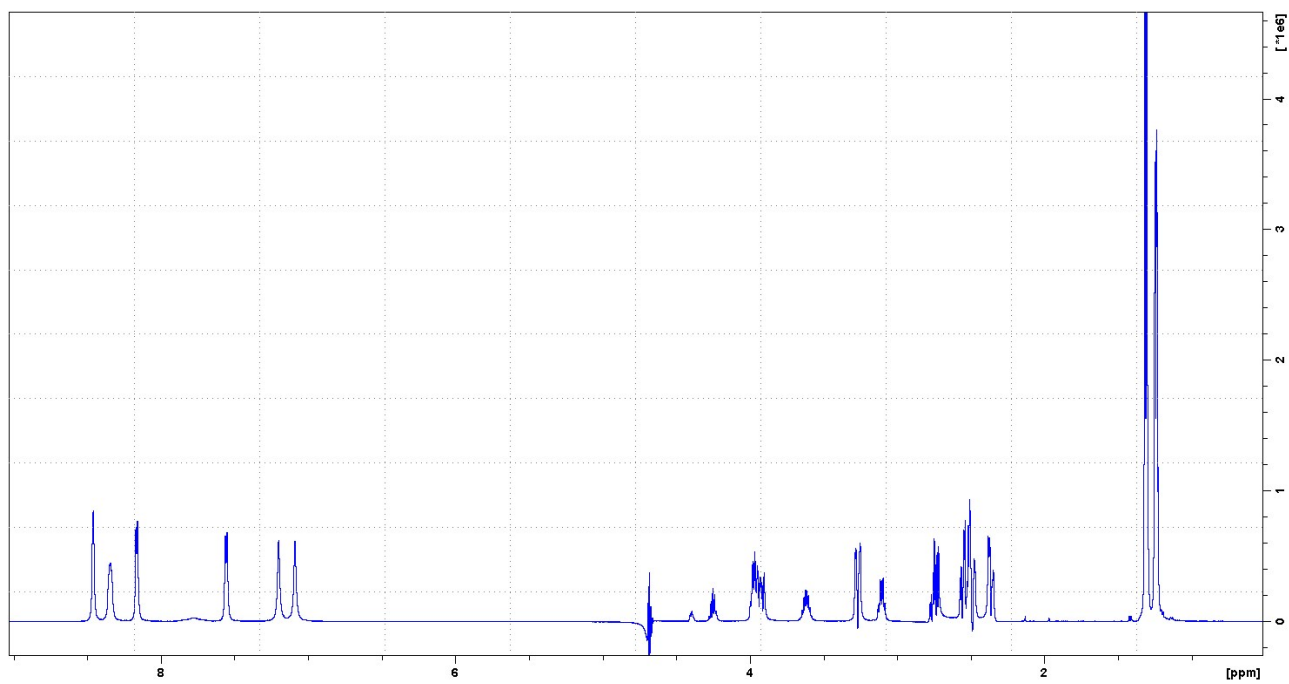

**Figure 23.** 600 MHz  $^1\text{H}$  NMR spectrum of cyclo-(1,4)-[SuccAADap]-NH<sub>2</sub> (23).

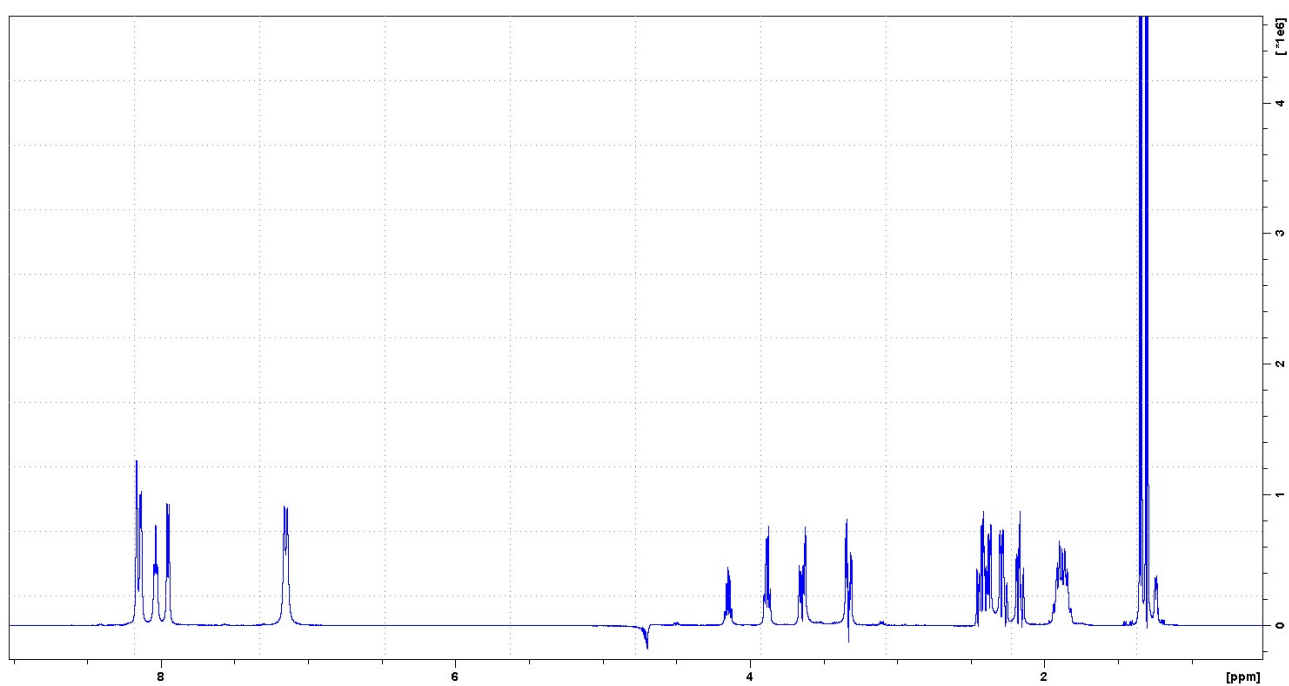

**Figure 24.** 600 MHz  $^1\text{H}$  NMR spectrum of cyclo-(1,4)-[GlutAADap]-NH<sub>2</sub> (24).



**Table S5.** Amide proton coupling constants (Hz) of **1–24** in H<sub>2</sub>O:D<sub>2</sub>O (9:1).

| #  |      | X   | A   | A   | Z   |     |
|----|------|-----|-----|-----|-----|-----|
| 1  | Dap  | 6.8 | 6.3 | 7.7 | 8.9 | D   |
| 2  | Dab  | 7   | 6.1 | 7.9 | 7.7 | D   |
| 3  | O    | 6.3 | 7.3 | 6.6 | 8.1 | D   |
| 4  | K    | 5.8 | 6   | 4.9 | 7.9 | D   |
| 5  | D    | 8   | 4.2 | 6.3 | 7.3 | Dap |
| 6  | D    | 7.4 | 4.1 | 6.3 | 7.2 | Dab |
| 7  | D    | 7.9 | 3.1 | 5.0 | 7.5 | O   |
| 8  | D    | 7.5 | 4.6 | 5.8 | 7.3 | K   |
| 9  | Dap  | 6.4 | 4.3 | 6.8 | 8.1 | E   |
| 10 | Dab  | 6.2 | 5.5 | 6.7 | 8.8 | E   |
| 11 | O    | 6.2 | 5.9 | 4.4 | 8.1 | E   |
| 12 | K    | 6   | 5.3 | 4.8 | 8.8 | E   |
| 13 | E    | 6.1 | 4.4 | 5.6 | 7.8 | Dap |
| 14 | E    | 6   | 5.8 | 5.1 | 7.8 | Dab |
| 15 | E    | 5.9 | 4.5 | 6.0 | 7.1 | O   |
| 16 | E    | 5.3 | 5.3 | 4.5 | 7.6 | K   |
| 17 | d    | 8.7 | 4.5 | 5.9 | 6.7 | Dap |
| 18 | e    | 6.0 | 3.8 | 4.9 | 8.4 | Dap |
| 19 | d    | 7.5 | 3.7 | 5.7 | 7   | Dab |
| 20 | d    | 8.1 | 4.3 | 5.6 | 7.6 | O   |
| 21 | IsoD | 3.1 | 7.0 | 8.1 | 7.5 | Dap |
| 22 | Isod | 2.8 | 6.1 | 7.5 | 8.8 | Dap |
| 23 | Succ | n/a | 2.5 | 6.4 | 7.2 | Dap |
| 24 | Glut | n/a | 1.9 | 5.3 | 8.6 | Dap |

Yellow > 8 Hz ( $\beta$ -strand), Green < 6 Hz ( $\alpha$ -helix)

**Table S6.** Amide proton temperature coefficients (ppb/K) for **1–24** in H<sub>2</sub>O:D<sub>2</sub>O (9:1).

| #  |      | X    | A    | A    | Z    |     | S.C. NH | CtermH1 | CtermH2 |
|----|------|------|------|------|------|-----|---------|---------|---------|
| 1  | Dap  | 6.3  | 7.1  | 7.3  | 5.9  | D   | 6.2     | 5       | 5.4     |
| 2  | Dab  | 7.6  | 8    | 7.8  | 6.9  | D   | 6.7     | 5.9     | 6.5     |
| 3  | O    | 8.5  | 7.2  | 6.4  | 5.5  | D   | 7.9     | 5.8     | 6.1     |
| 4  | K    | 7.4  | 7.3  | 7.5  | 6.2  | D   | 6.6     | 4.9     | 5.2     |
| 5  | D    | 7.5  | 6.4  | 8.6  | 3.9  | Dap | 9.1     | 1.4     | 5.2     |
| 6  | D    | 6.5  | 9.4  | 8    | 2.8  | Dab | 7.6     | 2.6     | 7.2     |
| 7  | D    | 8.4  | 7.3  | 8.3  | 2.7  | O   | 9.3     | 2.2     | 7.6     |
| 8  | D    | 4.1  | 5.5  | 5    | 8    | K   | 4.4     | 4.9     | 7.8     |
| 9  | Dap  | 6.2  | 6.9  | 6.5  | 3.9  | E   | 6.2     | 3.1     | 6.3     |
| 10 | Dab  | 8.2  | 9.7  | 10.8 | 8.1  | E   | 6.7     | 6.3     | 6.5     |
| 11 | O    | 9.3  | 8.2  | 3.9  | 5.9  | E   | 7.9     | 4.9     | 7.2     |
| 12 | K    | 7.5  | 7.6  | 6.8  | 8.2  | E   | 6.6     | 5.7     | 5.8     |
| 13 | E    | 6.9  | 6    | 8    | 4.4  | Dap | 7.9     | 0.6     | 6.3     |
| 14 | E    | 8    | 7.2  | 8.1  | 7.9  | Dab | 7.8     | 6       | 6.7     |
| 15 | E    | 8.5  | 7.4  | 4    | 3.6  | O   | 9.2     | 2.9     | 7.2     |
| 16 | E    | 7.9  | 7.9  | 8.2  | 8.8  | K   | 7.3     | 6.5     | 7.2     |
| 17 | d    | 5.8  | 9.3  | 5.1  | 5.6  | Dap | 8.0     | 0.9     | 6.4     |
| 18 | e    | 7.1  | 5.5  | 9.5  | 4.2  | Dap | 7.9     | 0.3     | 6.3     |
| 19 | d    | 8.0  | 6.9  | 8.2  | 1.4  | Dab | 6.4     | 2.2     | 7.2     |
| 20 | d    | 7.9  | 8.8  | 6.7  | 2.8  | O   | 7.2     | 2.0     | 7.0     |
| 21 | IsoD | 7.4  | 8.54 | 2.55 | 7.60 | Dap | 8.5     | 1.9     | 6.2     |
| 22 | Isod | 6.09 | 9.19 | 3.57 | 5.49 | Dap | 7.9     | 2.1     | 5.6     |
| 23 | Succ | n/a  | 6.97 | 8.85 | 3.37 | Dap | 8.8     | 1.3     | 14.7    |
| 24 | Glut | n/a  | 6.61 | 8.03 | 2.54 | Dap | 7.6     | 0.4     | 5.8     |

Cyan = < 4 ppb/K (likely H-bond). S.C. = side chain.

**Table S7.** Proton NMR chemical shifts (ppm) of **1–24** in H<sub>2</sub>O:D<sub>2</sub>O (9:1).

| Peptide   | Residue          | NH         | H $\alpha$ | H $\beta$  | Other                                                                      |
|-----------|------------------|------------|------------|------------|----------------------------------------------------------------------------|
| <b>5</b>  | Ac-              |            | 2.00       |            |                                                                            |
|           | Asp1             | 8.42       | 4.91       | 2.72       |                                                                            |
|           | Ala2             | 8.64       | 4.12       | 1.42       |                                                                            |
|           | Ala3             | 8.34       | 4.33       | 1.39       |                                                                            |
|           | Dap4             | 7.72       | 4.48       | 3.36, 3.99 | NH $\gamma$ 8.47                                                           |
|           | -NH <sub>2</sub> | 7.20, 7.28 |            |            |                                                                            |
| <b>6</b>  | Ac-              |            | 2.03       |            |                                                                            |
|           | Asp1             | 8.41       | 4.76       | 2.68       |                                                                            |
|           | Ala2             | 8.93       | 4.15       | 1.44       |                                                                            |
|           | Ala3             | 8.43       | 4.35       | 1.45       |                                                                            |
|           | Dab4             | 7.59       | 4.35       | 1.98       | H $\gamma$ = 3.14, 3.29,<br>NH $\delta$ = 8.19                             |
|           | -NH <sub>2</sub> | 7.22, 7.27 |            |            |                                                                            |
| <b>7</b>  | Ac-              |            | 2.03       |            |                                                                            |
|           | Asp1             | 8.64       | 4.84       | 2.47 2.81  |                                                                            |
|           | Ala2             | 8.46       | 4.02       | 1.42       |                                                                            |
|           | Ala3             | 8.56       | 4.19       | 1.42       |                                                                            |
|           | Orn4             | 8.64       | 4.12       | 1.71, 1.82 | H $\gamma$ = 1.52, 1.93<br>H $\delta$ = 2.82, 3.55<br>NH $\epsilon$ = 8.33 |
|           | -NH <sub>2</sub> | 7.22, 7.28 |            |            |                                                                            |
| <b>9</b>  | Ac-              |            | 2.04       |            |                                                                            |
|           | Dap1             | 8.22       | 4.50       | 3.43, 3.94 | NH $\gamma$ = 8.02                                                         |
|           | Ala2             | 8.70       | 4.21       | 1.42       |                                                                            |
|           | Ala3             | 8.16       | 4.34       | 1.42       |                                                                            |
|           | Glu4             | 7.84       | 4.45       | 2.00, 2.29 | H $\gamma$ = 2.57                                                          |
|           | -NH <sub>2</sub> | 7.18, 7.38 |            |            |                                                                            |
| <b>13</b> | Ac-              |            | 2.01       |            |                                                                            |
|           | Glu1             | 8.21       | 4.45       | 2.14       | H $\gamma$ = 2.36, 2.48                                                    |
|           | Ala2             | 8.46       | 4.10       | 1.42       |                                                                            |
|           | Ala3             | 8.25       | 4.24       | 1.42       |                                                                            |
|           | Dap4             | 8.15       | 4.60       | 3.33, 3.77 | NH $\gamma$ = 8.08                                                         |
|           | -NH <sub>2</sub> | 7.26, 7.31 |            |            |                                                                            |
| <b>15</b> | Ac-              |            |            |            |                                                                            |
|           | Glu1             | 8.40       | 4.22       | 2.07, 2.14 | H $\gamma$ = 2.32, 2.41                                                    |
|           | Ala2             | 8.50       | 4.22       | 1.43       |                                                                            |
|           | Ala3             | 7.97       | 4.31       | 1.41       |                                                                            |
|           | Orn4             | 7.90       | 4.22       | 1.88       | H $\gamma$ = 1.57<br>H $\delta$ = 3.00, 3.48<br>NH $\epsilon$ = 8.03       |
|           | -NH <sub>2</sub> | 7.14, 7.35 |            |            |                                                                            |
| <b>17</b> | Ac-              |            | 2.13       |            |                                                                            |
|           | D-Asp1           | 2.13       | 4.83       | 2.59, 2.99 |                                                                            |
|           | Ala2             | 8.27       | 4.16       | 1.42       |                                                                            |
|           | Ala3             | 8.50       | 4.27       | 1.42       |                                                                            |
|           | Dap4             | 8.10       | 4.42       | 3.01, 3.99 | NH $\gamma$ = 8.60                                                         |
|           | -NH <sub>2</sub> | 7.11, 7.37 |            |            |                                                                            |
| <b>18</b> | Ac-              |            | 2.07       |            |                                                                            |
|           | D-Glu1           | 8.50       | 4.10       | 2.02, 2.23 | H $\gamma$ = 2.48, 2.55                                                    |
|           | Ala2             | 8.06       | 3.98       | 1.39       |                                                                            |
|           | Ala3             | 8.38       | 4.18       | 1.45       |                                                                            |
|           | Dap4             | 8.21       | 4.56       | 3.35, 3.78 | NH $\gamma$ = 8.23                                                         |
|           | -NH <sub>2</sub> | 7.17, 7.34 |            |            |                                                                            |
| <b>19</b> | Ac-              | 2.11       |            |            |                                                                            |
|           | D-Asp1           | 8.47       | 4.72       |            |                                                                            |
|           | Ala2             | 8.31       | 4.13       | 1.43       |                                                                            |
|           | Ala3             | 8.35       | 4.31       | 1.48       |                                                                            |

|           |                      |            |      |            |                                                                      |
|-----------|----------------------|------------|------|------------|----------------------------------------------------------------------|
|           | Dab4                 | 7.77       | 4.30 | 2.06, 2.10 | H $\gamma$ = 3.11, 3.57<br>NH $\delta$ = 8.17                        |
|           | -NH <sub>2</sub>     | 7.12, 7.15 |      |            |                                                                      |
| <b>20</b> | Ac-                  |            | 2.11 |            |                                                                      |
|           | D-Asp1               | 8.49       | 4.74 | 2.62, 2.95 |                                                                      |
|           | Ala2                 | 8.18       | 4.17 | 1.41       |                                                                      |
|           | Ala3                 | 8.32       | 4.24 | 1.47       |                                                                      |
|           | Orn4                 | 7.32       | 4.19 | 1.68       | H $\gamma$ = 1.94<br>H $\delta$ = 2.92, 3.49<br>NH $\epsilon$ = 7.99 |
|           | -NH <sub>2</sub>     | 7.16, 7.20 |      |            |                                                                      |
| <b>21</b> | isoD1                | 8.24       | 4.67 | 2.78 (2H)  | Ac-cap 1.89                                                          |
|           | A2                   | 8.56       | 3.96 | 1.31       |                                                                      |
|           | A3                   | 8.23       | 4.29 | 1.30       |                                                                      |
|           | Dap4-NH <sub>2</sub> | 7.34       | 4.48 | 3.90, 3.33 | T1 7.20, T2 7.11                                                     |
| <b>22</b> | Isod                 | 8.05       | 4.68 | 3.22, 2.60 | Ac-cap 1.99                                                          |
|           | A1                   | 8.53       | 3.94 | 1.31       |                                                                      |
|           | A2                   | 8.28       | 4.21 | 1.32       |                                                                      |
|           | Dap3-NH <sub>2</sub> | 7.53       | 4.40 | 3.92, 3.33 | T1 7.22, T2 7.13;<br>side NH 8.22                                    |
| <b>23</b> | Succ1                |            |      |            | 2.75 1H; 2.58-<br>2.46 2H; 2.37<br>1H;                               |
|           | A2                   | 8.46       | 3.98 | 1.31       |                                                                      |
|           | A3                   | 8.17       | 4.25 | 1.31       |                                                                      |
|           | Dap4-NH <sub>2</sub> | 7.46       | 4.40 | 3.93, 3.27 | T1 7.20, T2 7.09;                                                    |
| <b>24</b> | Glut1                |            |      |            | 2.46-2.37 2H;<br>2.29 1H; 2.17<br>1H; 1.94-1.84<br>2H;               |
|           | A2                   | 8.16       | 3.89 | 1.31       |                                                                      |
|           | A3                   | 8.14       | 4.15 | 1.35       |                                                                      |
|           | Dap4-NH <sub>2</sub> | 7.95       | 4.51 | 3.65, 3.33 | T1, 7.16, T2<br>7.14;                                                |
|           |                      |            |      |            |                                                                      |

## 7.2 Phi, Psi Angle Analysis

**Table S8.**  $\phi$ ,  $\psi$ ,  $\chi^1$  (degree) angles for **5–7, 9, 13, 15, 17–20**.

| #         | $\phi_i$ | $\psi_i$ | $\phi_{i+1}$ | $\psi_{i+1}$ | $\phi_{i+2}$ | $\psi_{i+2}$ | $\phi_{i+3}$ | $\psi_{i+3}$ | $\chi^1_{i+3}$ |
|-----------|----------|----------|--------------|--------------|--------------|--------------|--------------|--------------|----------------|
| <b>5</b>  | -114     | 69       | -62          | -36          | -73          | -46          | -68          | -39          | 58             |
| <b>6</b>  | -101     | 117      | -57          | -40          | -54          | -35          | -85          | -6           | -28            |
| <b>7</b>  | -86      | -35      | -60          | -39          | -56          | -32          | -85          | 12           | -59            |
| <b>9</b>  | -122     | 122      | -58          | -41          | -56          | -34          | -114         | 21           | 30             |
| <b>13</b> | -151     | 128      | -62          | -35          | -70          | -9           | 16           | -49          | 54             |
| <b>15</b> | -69      | 27       | -57          | 31           | -6           | -5           | -18          | 12           | -77            |
| <b>17</b> | 148      | -41      | -63          | -44          | -65          | -49          | -66          | -40          | 59             |
| <b>18</b> | 109      | 45       | -90          | -42          | -52          | -45          | -91          | -33          | 41             |
| <b>19</b> | 69       | -3       | -56          | -39          | -54          | -36          | -87          | 0            | -23            |
| <b>20</b> | 123      | -47      | -58          | -30          | -51          | -39          | -77          | -13          | -66            |

## 7.4 ROE restraints

**Table S9.** Restraints used to calculate the structure of **5** Ac-[DAADap]-NH<sub>2</sub> H<sub>2</sub>O:D<sub>2</sub>O (9:1).

|    | RES1 | ATOM1 | RES2 | ATOM2 | DISTANCE (Å) | CLASS     |
|----|------|-------|------|-------|--------------|-----------|
| 1  | ACE1 | HA    | ASP2 | HN    | 3.95         | weak      |
| 2  | ACE1 | HA    | ALA3 | HN    | 5.60         | very weak |
| 3  | ASP2 | HA    | ASP2 | HN    | 4.06         | weak      |
| 4  | ASP2 | HA    | ALA3 | HN    | 3.55         | weak      |
| 5  | ASP2 | HA    | ALA4 | HN    | 3.70         | weak      |
| 6  | ASP2 | HA    | DAP5 | HN    | 3.66         | weak      |
| 7  | ASP2 | HB    | ASP2 | HN    | 4.01         | weak      |
| 8  | ASP2 | HB    | ALA3 | HA    | 5.63         | very weak |
| 9  | ASP2 | HB    | ALA3 | HN    | 5.57         | very weak |
| 10 | ASP2 | HB    | DAP5 | H1    | 5.92         | very weak |
| 11 | ASP2 | HB    | DAP5 | H2    | 6.24         | very weak |
| 12 | ASP2 | HB    | DAP5 | HB    | 4.99         | weak      |
| 13 | ASP2 | HB    | DAP5 | HG1   | 3.60         | weak      |
| 14 | ASP2 | HB    | DAP5 | HN    | 5.40         | very weak |
| 15 | ALA3 | HA    | ALA3 | HN    | 4.38         | weak      |
| 16 | ALA3 | HA    | ALA4 | HN    | 4.71         | weak      |
| 17 | ALA3 | HA    | DAP5 | H1    | 5.58         | very weak |
| 18 | ALA3 | HA    | DAP5 | H2    | 6.09         | very weak |
| 19 | ALA3 | HA    | DAP5 | HN    | 5.44         | very weak |
| 20 | ALA3 | HB    | ALA3 | HN    | 4.22         | weak      |
| 21 | ALA4 | HA    | ALA3 | HN    | 6.68         | very weak |
| 22 | ALA4 | HA    | DAP5 | H1    | 5.47         | very weak |
| 23 | ALA4 | HA    | DAP5 | H2    | 6.02         | very weak |
| 24 | ALA4 | HA    | DAP5 | HN    | 4.43         | weak      |
| 25 | ALA4 | HB    | ALA4 | HN    | 3.95         | weak      |
| 26 | ALA4 | HB    | DAP5 | H1    | 6.03         | very weak |
| 27 | ALA4 | HB    | DAP5 | HN    | 4.84         | weak      |
| 28 | ALA4 | HN    | ALA3 | HN    | 4.47         | weak      |
| 29 | DAP5 | H1    | DAP5 | HG1   | 5.48         | very weak |
| 30 | DAP5 | H1    | DAP5 | HN    | 4.60         | weak      |
| 31 | DAP5 | H2    | DAP5 | HG1   | 5.71         | very weak |
| 32 | DAP5 | H2    | DAP5 | HN    | 5.34         | very weak |
| 33 | DAP5 | HA    | ALA4 | HN    | 5.77         | very weak |
| 34 | DAP5 | HA    | DAP5 | H1    | 4.57         | weak      |
| 35 | DAP5 | HA    | DAP5 | H2    | 5.11         | very weak |
| 36 | DAP5 | HA    | DAP5 | HG1   | 5.19         | very weak |
| 37 | DAP5 | HA    | DAP5 | HN    | 4.27         | weak      |

|    |      |    |      |     |      |           |
|----|------|----|------|-----|------|-----------|
| 38 | DAP5 | HB | ALA4 | HN  | 5.41 | very weak |
| 39 | DAP5 | HB | DAP5 | H1  | 5.90 | very weak |
| 40 | DAP5 | HB | DAP5 | H2  | 6.12 | very weak |
| 41 | DAP5 | HB | DAP5 | HG1 | 3.74 | weak      |
| 42 | DAP5 | HB | DAP5 | HN  | 4.22 | weak      |
| 43 | DAP5 | HB | DAP5 | HN  | 5.32 | very weak |
| 44 | DAP5 | HN | ALA3 | HN  | 4.80 | weak      |
| 45 | DAP5 | HN | ALA4 | HN  | 4.29 | weak      |
| 46 | DAP5 | HN | DAP5 | HG1 | 5.15 | very weak |

**Figure S10.** Restraints used to calculate the structure of **6** Ac-[DAADab]-NH<sub>2</sub> in H<sub>2</sub>O:D<sub>2</sub>O (9:1).

|    | RES1 | ATOM1 | RES2 | ATOM2 | DISTANCE (Å) | CLASS     |
|----|------|-------|------|-------|--------------|-----------|
| 1  | ACE1 | HA    | ASP2 | HN    | 4.18         | weak      |
| 2  | ASP2 | HA    | ASP2 | HN    | 4.14         | weak      |
| 3  | ASP2 | HA    | ALA3 | HN    | 3.57         | weak      |
| 4  | ASP2 | HA    | DAB5 | HD1   | 5.24         | very weak |
| 5  | ASP2 | HB    | ASP2 | HN    | 4.32         | weak      |
| 6  | ASP2 | HB    | DAB5 | HD1   | 3.81         | weak      |
| 7  | ASP2 | HB    | DAB5 | HN    | 4.94         | weak      |
| 8  | ALA3 | HA    | ALA3 | HN    | 4.06         | weak      |
| 9  | ALA3 | HA    | ALA4 | HN    | 4.56         | weak      |
| 10 | ALA3 | HA    | DAB5 | H1    | 5.56         | very weak |
| 11 | ALA3 | HA    | DAB5 | HN    | 5.12         | very weak |
| 12 | ALA3 | HB    | ALA3 | HN    | 4.56         | weak      |
| 13 | ALA4 | HA    | ALA4 | HN    | 4.16         | weak      |
| 14 | ALA4 | HB    | ALA4 | HN    | 4.30         | weak      |
| 15 | ALA4 | HB    | DAB5 | HN    | 5.18         | very weak |
| 16 | ALA4 | HN    | ALA3 | HN    | 4.51         | weak      |
| 17 | DAB5 | H1    | DAB5 | HN    | 4.69         | weak      |
| 18 | DAB5 | H2    | DAB5 | HN    | 5.66         | very weak |
| 19 | DAB5 | HA    | DAB5 | H1    | 4.35         | weak      |
| 20 | DAB5 | HA    | DAB5 | H2    | 5.15         | very weak |
| 21 | DAB5 | HA    | DAB5 | HD1   | 5.11         | very weak |
| 22 | DAB5 | HA    | DAB5 | HN    | 4.11         | weak      |
| 23 | DAB5 | HB    | DAB5 | H1    | 5.30         | very weak |
| 24 | DAB5 | HB    | DAB5 | HD1   | 4.84         | weak      |
| 25 | DAB5 | HB    | DAB5 | HN    | 4.37         | weak      |
| 26 | DAB5 | HG    | DAB5 | HD1   | 4.27         | weak      |
| 27 | DAB5 | HG    | DAB5 | HD1   | 4.13         | weak      |
| 28 | DAB5 | HG    | DAB5 | HN    | 4.65         | weak      |
| 29 | DAB5 | HN    | ALA4 | HN    | 4.42         | weak      |
| 30 | DAB5 | HN    | DAB5 | HD1   | 4.72         | weak      |
| 31 | ASP2 | O     | DAB5 | HN    | 1.6-2.2      | H-bond    |
| 32 | ASP2 | O     | DAB5 | N     | 2.6-3.2      | H-bond    |
| 33 | ALA3 | O     | DAB5 | H1    | 1.6-2.2      | H-bond    |
| 34 | ALA3 | O     | DAB5 | NT    | 2.6-3.2      | H-bond    |

**Table S11.** Restraints used to calculate the structure of **7** Ac-[DAAO]-NH<sub>2</sub> in H<sub>2</sub>O:D<sub>2</sub>O (9:1).

|    | RES1 | ATOM1 | RES2 | ATOM2 | DISTANCE (Å) | CLASS     |
|----|------|-------|------|-------|--------------|-----------|
| 1  | ACE1 | HA    | ASP2 | HN    | 4.42         | weak      |
| 2  | ACE1 | HA    | ALA3 | HN    | 5.84         | very weak |
| 3  | ASP2 | HA    | ASP2 | HN    | 4.04         | weak      |
| 4  | ASP2 | HA    | ALA3 | HN    | 3.93         | weak      |
| 5  | ASP2 | HA    | ALA4 | HN    | 3.58         | weak      |
| 6  | ASP2 | HA    | ORN5 | HD    | 4.65         | weak      |
| 7  | ASP2 | HA    | ORN5 | HN    | 3.73         | weak      |
| 8  | ASP2 | HA    | ORN5 | NE    | 3.77         | weak      |
| 9  | ASP2 | HB    | ASP2 | HN    | 4.82         | weak      |
| 10 | ASP2 | HB    | ASP2 | HN    | 4.82         | weak      |
| 11 | ASP2 | HB    | ORN5 | NE    | 5.17         | very weak |
| 12 | ASP2 | HN    | ALA4 | HN    | 4.66         | weak      |
| 13 | ASP2 | HN    | ORN5 | NE    | 5.30         | very weak |
| 14 | ALA3 | HA    | ASP2 | HN    | 5.96         | very weak |
| 15 | ALA3 | HA    | ALA4 | HN    | 4.83         | weak      |
| 16 | ALA3 | HA    | ORN5 | H1    | 5.34         | very weak |
| 17 | ALA3 | HA    | ORN5 | H2    | 4.80         | weak      |
| 18 | ALA3 | HA    | ORN5 | HN    | 5.06         | very weak |
| 19 | ALA3 | HB    | ALA3 | HN    | 4.70         | weak      |
| 20 | ALA3 | HB    | ORN5 | HN    | 5.27         | very weak |
| 21 | ALA4 | HA    | ORN5 | H1    | 5.44         | very weak |
| 22 | ALA4 | HA    | ORN5 | HN    | 3.73         | weak      |
| 23 | ALA4 | HB    | ALA4 | HN    | 4.57         | weak      |
| 24 | ALA4 | HN    | ALA3 | HN    | 4.46         | weak      |
| 25 | ALA4 | HN    | ORN5 | NE    | 4.78         | weak      |
| 26 | ALA4 | HN    | ORN5 | NE    | 4.80         | weak      |
| 27 | ORN5 | HA    | ORN5 | H1    | 4.68         | weak      |
| 28 | ORN5 | HA    | ORN5 | H2    | 3.94         | weak      |
| 29 | ORN5 | HB    | ORN5 | H1    | 4.84         | weak      |
| 30 | ORN5 | HB    | ORN5 | HN    | 4.30         | weak      |
| 31 | ORN5 | HB    | ORN5 | HN    | 4.53         | weak      |
| 32 | ORN5 | HB    | ORN5 | NE    | 5.75         | very weak |
| 33 | ORN5 | HB    | ORN5 | NE    | 4.78         | weak      |
| 34 | ORN5 | HD    | ORN5 | HN    | 6.00         | very weak |
| 35 | ORN5 | HD    | ORN5 | HN    | 5.54         | very weak |
| 36 | ORN5 | HD    | ORN5 | NE    | 3.65         | weak      |
| 37 | ORN5 | HG    | ORN5 | H1    | 5.25         | very weak |
| 38 | ORN5 | HG    | ORN5 | HN    | 5.96         | very weak |
| 39 | ORN5 | HG    | ORN5 | HN    | 5.89         | very weak |
| 40 | ORN5 | HG    | ORN5 | NE    | 5.93         | very weak |
| 41 | ORN5 | HG    | ORN5 | NE    | 5.89         | very weak |
| 42 | ORN5 | HN    | ALA3 | HN    | 4.28         | weak      |
| 43 | ORN5 | HN    | ALA4 | HN    | 4.61         | weak      |
| 44 | ORN5 | HN    | ORN5 | NE    | 4.82         | weak      |
| 45 | ASP2 | O     | ORN5 | HN    | 1.6-2.2      | H-bond    |
| 46 | ASP2 | O     | ORN5 | N     | 2.6-3.2      | H-bond    |
| 47 | ALA3 | O     | ORN5 | H1    | 1.6-2.2      | H-bond    |
| 48 | ALA3 | O     | ORN5 | NT    | 2.6-3.2      | H-bond    |

**Table S12.** Restraints used to calculate the structure of **9** Ac-[DapAAE]-NH<sub>2</sub> H<sub>2</sub>O:D<sub>2</sub>O (9:1).

|   | RES1 | ATOM1 | RES2 | ATOM2 | DISTANCE (Å) | CLASS |
|---|------|-------|------|-------|--------------|-------|
| 1 | ACE1 | HA    | DAP2 | HN    | 4.30         | weak  |
| 2 | DAP2 | HA    | DAP2 | HG    | 4.89         | weak  |

|    |      |    |      |    |         |           |
|----|------|----|------|----|---------|-----------|
| 3  | DAP2 | HA | DAP2 | HN | 4.28    | weak      |
| 4  | DAP2 | HA | ALA3 | HN | 3.60    | weak      |
| 5  | DAP2 | HB | DAP2 | HN | 5.04    | very weak |
| 6  | DAP2 | HB | DAP2 | HG | 4.26    | weak      |
| 7  | DAP2 | HB | DAP2 | HG | 4.15    | weak      |
| 8  | DAP2 | HB | DAP2 | HN | 4.52    | weak      |
| 9  | DAP2 | HB | ALA3 | HN | 4.65    | weak      |
| 10 | DAP2 | HB | ALA4 | HN | 4.83    | weak      |
| 11 | DAP2 | HB | GLU5 | HN | 5.44    | very weak |
| 12 | DAP2 | HG | DAP2 | HN | 4.47    | weak      |
| 13 | DAP2 | HG | ALA3 | HN | 5.49    | very weak |
| 14 | ALA3 | HA | ALA4 | HN | 4.21    | weak      |
| 15 | ALA3 | HA | GLU5 | H1 | 5.52    | very weak |
| 16 | ALA3 | HA | GLU5 | HN | 5.07    | very weak |
| 17 | ALA3 | HB | ALA3 | HN | 4.70    | weak      |
| 18 | ALA3 | HA | ALA3 | HN | 4.43    | weak      |
| 19 | ALA4 | HA | ALA4 | HN | 3.98    | weak      |
| 20 | ALA4 | HA | GLU5 | H1 | 4.20    | weak      |
| 21 | ALA4 | HA | GLU5 | H2 | 5.91    | very weak |
| 22 | ALA4 | HA | GLU5 | HN | 4.34    | weak      |
| 23 | ALA4 | HB | ALA4 | HN | 5.10    | very weak |
| 24 | ALA4 | HB | GLU5 | HN | 5.39    | very weak |
| 25 | ALA4 | HN | ALA3 | HN | 4.70    | weak      |
| 26 | GLU5 | H1 | GLU5 | HN | 4.77    | weak      |
| 27 | GLU5 | H2 | GLU5 | HN | 5.44    | very weak |
| 28 | GLU5 | HA | GLU5 | H1 | 4.45    | weak      |
| 29 | GLU5 | HA | GLU5 | H2 | 5.29    | very weak |
| 30 | GLU5 | HA | GLU5 | HN | 4.31    | weak      |
| 31 | GLU5 | HB | DAP2 | HG | 4.75    | weak      |
| 32 | GLU5 | HB | GLU5 | H1 | 5.51    | very weak |
| 33 | GLU5 | HB | GLU5 | H1 | 5.66    | very weak |
| 34 | GLU5 | HB | GLU5 | H2 | 5.96    | very weak |
| 35 | GLU5 | HB | GLU5 | H2 | 5.86    | very weak |
| 36 | GLU5 | HB | GLU5 | HN | 4.65    | weak      |
| 37 | GLU5 | HB | GLU5 | HN | 5.26    | very weak |
| 38 | GLU5 | HG | DAP2 | HG | 4.84    | weak      |
| 39 | GLU5 | HG | DAP2 | HG | 4.10    | weak      |
| 40 | GLU5 | HG | GLU5 | H1 | 5.88    | very weak |
| 41 | GLU5 | HG | GLU5 | H2 | 6.1     | very weak |
| 42 | GLU5 | HG | GLU5 | HN | 5.26    | very weak |
| 43 | GLU5 | HG | GLU5 | HN | 5.20    | very weak |
| 44 | GLU5 | HN | ALA3 | HN | 6.07    | very weak |
| 45 | GLU5 | HN | ALA4 | HN | 4.39    | weak      |
| 46 | DAP2 | O  | GLU5 | HN | 1.6-2.2 | H-bond    |
| 47 | DAP2 | O  | GLU5 | N  | 2.6-3.2 | H-bond    |
| 48 | ALA3 | O  | GLU5 | H1 | 1.6-2.2 | H-bond    |
| 49 | ALA3 | O  | GLU5 | NT | 2.6-3.2 | H-bond    |

**Table S13.** Restraints used to calculate the structure of **13** Ac-[EAADap]-NH<sub>2</sub> H<sub>2</sub>O:D<sub>2</sub>O (9:1).

|   | RES1 | ATOM1 | RES2 | ATOM2 | DISTANCE (Å) | CLASS     |
|---|------|-------|------|-------|--------------|-----------|
| 1 | ACE1 | HA    | GLU2 | HN    | 4.79         | weak      |
| 2 | ACE1 | HA    | ALA3 | HN    | 5.97         | very weak |
| 3 | ACE1 | HA    | DAP5 | H1    | 6.28         | very weak |
| 4 | ACE1 | HA    | DAP5 | H2    | 6.93         | very weak |
| 5 | ACE1 | HN    | DAP5 | H1    | 3.77         | weak      |
| 6 | GLU2 | HA    | ALA3 | HN    | 3.87         | weak      |
| 7 | GLU2 | HA    | ALA4 | HN    | 4.03         | weak      |

|    |      |     |      |    |         |           |
|----|------|-----|------|----|---------|-----------|
| 8  | GLU2 | HA  | DAP5 | HG | 6.41    | very weak |
| 9  | GLU2 | HB  | GLU2 | HN | 5.15    | very weak |
| 10 | GLU2 | HB  | ALA3 | HN | 5.95    | very weak |
| 11 | GLU2 | HB  | ALA4 | HN | 5.87    | very weak |
| 12 | GLU2 | HB  | DAP5 | HG | 5.99    | very weak |
| 13 | GLU2 | HB  | DAP5 | HN | 6.31    | very weak |
| 14 | GLU2 | HG2 | GLU2 | HN | 5.06    | very weak |
| 15 | GLU2 | HG2 | DAP5 | HG | 4.38    | weak      |
| 16 | GLU2 | HG3 | GLU2 | HN | 5.53    | very weak |
| 17 | GLU2 | HG3 | ALA3 | HN | 5.92    | very weak |
| 18 | GLU2 | HG3 | DAP5 | HG | 5.28    | very weak |
| 19 | GLU2 | HN  | ALA3 | HN | 5.13    | very weak |
| 20 | ALA3 | HA  | ACE1 | HN | 5.74    | very weak |
| 21 | ALA3 | HA  | ALA4 | HN | 4.96    | weak      |
| 22 | ALA3 | HA  | DAP5 | H1 | 5.91    | very weak |
| 23 | ALA3 | HA  | DAP5 | H2 | 6.33    | very weak |
| 24 | ALA3 | HA  | DAP5 | HN | 5.56    | very weak |
| 25 | ALA3 | HB  | ALA3 | HN | 5.28    | very weak |
| 26 | ALA4 | HA  | DAP5 | H1 | 5.92    | very weak |
| 27 | ALA4 | HA  | DAP5 | H2 | 6.86    | very weak |
| 28 | ALA4 | HA  | DAP5 | HG | 6.31    | very weak |
| 29 | ALA4 | HA  | DAP5 | HN | 4.52    | weak      |
| 30 | ALA4 | HB  | ALA4 | HN | 4.97    | weak      |
| 31 | ALA4 | HB  | DAP5 | HN | 5.69    | very weak |
| 32 | ALA4 | HN  | DAP5 | H1 | 6.57    | very weak |
| 33 | DAP5 | HA  | DAP5 | H1 | 4.87    | weak      |
| 34 | DAP5 | HA  | DAP5 | H2 | 5.44    | very weak |
| 35 | DAP5 | HA  | DAP5 | HG | 5.30    | very weak |
| 36 | DAP5 | HB2 | DAP5 | H1 | 5.83    | very weak |
| 37 | DAP5 | HB2 | DAP5 | H2 | 5.73    | very weak |
| 38 | DAP5 | HB2 | DAP5 | HN | 4.89    | weak      |
| 39 | DAP5 | HB3 | DAP5 | H1 | 5.97    | very weak |
| 40 | DAP5 | HB3 | DAP5 | H2 | 6.23    | very weak |
| 41 | DAP5 | HB3 | DAP5 | HN | 5.18    | very weak |
| 42 | DAP5 | HG  | DAP5 | H1 | 6.27    | very weak |
| 43 | DAP5 | HN  | DAP5 | H1 | 5.12    | very weak |
| 44 | DAP5 | HN  | DAP5 | H2 | 5.77    | very weak |
| 45 | GLU2 | O   | DAP5 | H1 | 1.6-2.2 | H-bond    |
| 46 | GLU2 | O   | DAP5 | NT | 2.6-3.2 | H-bond    |

**Table S14.** Restraints used to calculate the structure of **15** Ac-[EAAO]-NH<sub>2</sub> in H<sub>2</sub>O:D<sub>2</sub>O (9:1).

|    | RES1 | ATOM1 | RES2 | ATOM2 | DISTANCE (Å) | CLASS     |
|----|------|-------|------|-------|--------------|-----------|
| 1  | GLU2 | HA    | GLU2 | HN    | 4.28         | weak      |
| 2  | GLU2 | HB    | GLU2 | HN    | 3.99         | weak      |
| 3  | GLU2 | HB    | GLU2 | HN    | 4.75         | weak      |
| 4  | GLU2 | HB    | ALA3 | HN    | 5.10         | very weak |
| 5  | GLU2 | HB    | ALA3 | HN    | 5.52         | very weak |
| 6  | GLU2 | HB    | ORN5 | HE1   | 4.84         | weak      |
| 7  | GLU2 | HG    | GLU2 | HN    | 5.14         | very weak |
| 8  | GLU2 | HG    | GLU2 | HN    | 5.60         | very weak |
| 9  | GLU2 | HG    | ALA3 | HN    | 5.92         | very weak |
| 10 | GLU2 | HG    | ALA3 | HN    | 5.46         | very weak |
| 11 | GLU2 | HG    | ALA4 | HN    | 5.91         | very weak |
| 12 | GLU2 | HG    | ALA4 | HN    | 5.88         | very weak |
| 13 | GLU2 | HG    | ORN5 | HE1   | 4.57         | weak      |
| 14 | GLU2 | HG    | ORN5 | HE1   | 4.18         | weak      |
| 15 | ALA3 | HA    | ALA3 | HN    | 3.75         | weak      |
| 16 | ALA3 | HA    | ALA4 | HN    | 4.25         | weak      |
| 17 | ALA3 | HB    | ALA3 | HN    | 4.43         | weak      |



|    |      |    |      |     |         |           |
|----|------|----|------|-----|---------|-----------|
| 18 | ALA3 | HN | ALA4 | HN  | 4.62    | weak      |
| 19 | ALA4 | HA | ALA4 | HN  | 4.25    | weak      |
| 20 | ALA4 | HA | ORN5 | H1  | 5.73    | very weak |
| 21 | ALA4 | HA | ORN5 | H2  | 6.23    | very weak |
| 22 | ALA4 | HA | ORN5 | HN  | 4.06    | weak      |
| 23 | ALA4 | HB | ALA4 | HN  | 4.19    | weak      |
| 24 | ALA4 | HB | ORN5 | H1  | 6.37    | very weak |
| 25 | ALA4 | HB | ORN5 | H2  | 7.12    | very weak |
| 26 | ALA4 | HB | ORN5 | HN  | 5.25    | very weak |
| 27 | ORN5 | HA | ORN5 | H1  | 4.40    | weak      |
| 28 | ORN5 | HA | ORN5 | H2  | 5.05    | very weak |
| 29 | ORN5 | HA | ORN5 | HE1 | 4.86    | weak      |
| 30 | ORN5 | HA | ORN5 | HN  | 4.16    | weak      |
| 31 | ORN5 | HB | ORN5 | H1  | 5.22    | very weak |
| 32 | ORN5 | HB | ORN5 | H2  | 5.57    | very weak |
| 33 | ORN5 | HB | ORN5 | HE1 | 4.57    | weak      |
| 34 | ORN5 | HB | ORN5 | HN  | 4.36    | weak      |
| 35 | ORN5 | HD | ORN5 | HE  | 4.24    | weak      |
| 36 | ORN5 | HD | ORN5 | HE1 | 4.58    | weak      |
| 37 | ORN5 | HG | ORN5 | H1  | 5.98    | very weak |
| 38 | ORN5 | HG | ORN5 | H2  | 6.17    | very weak |
| 39 | ORN5 | HG | ORN5 | HE1 | 4.98    | weak      |
| 40 | ORN5 | HG | ORN5 | HN  | 4.61    | weak      |
| 41 | ORN5 | HN | ORN5 | H1  | 4.87    | weak      |
| 42 | ORN5 | HN | ORN5 | H2  | 5.35    | very weak |
| 43 | GLU2 | O  | ORN5 | HN  | 1.6-2.2 | H-bond    |
| 44 | GLU2 | O  | ORN5 | N   | 2.6-3.2 | H-bond    |
| 45 | ALA3 | O  | ORN5 | H1  | 1.6-2.2 | H-bond    |
| 46 | ALA3 | O  | ORN5 | NT  | 2.6-3.2 | H-bond    |

**Table S15.** Restraints used to calculate the structure of **17** Ac-[dAAdap]-NH<sub>2</sub> in H<sub>2</sub>O:D<sub>2</sub>O (9:1).

|    | RES1  | ATOM1 | RES2  | ATOM2 | DISTANCE (Å) | CLASS     |
|----|-------|-------|-------|-------|--------------|-----------|
| 1  | ACE1  | HA    | dASP2 | HN    | 4.00         | weak      |
| 2  | ACE1  | HA    | ALA3  | HN    | 5.41         | very weak |
| 3  | ACE1  | HA    | ALA4  | HN    | 6.20         | very weak |
| 4  | dASP2 | HA    | dASP2 | HN    | 4.07         | weak      |
| 5  | dASP2 | HA    | ALA3  | HN    | 4.29         | weak      |
| 6  | dASP2 | HB    | dASP2 | HN    | 5.67         | very weak |
| 7  | dASP2 | HB    | dASP2 | HN    | 4.56         | weak      |
| 8  | dASP2 | HB    | ALA3  | HN    | 5.79         | very weak |
| 9  | dASP2 | HB    | ALA4  | HN    | 6.15         | very weak |
| 10 | dASP2 | HB    | DAP5  | H2    | 6.35         | very weak |
| 11 | dASP2 | HB    | DAP5  | HG1   | 3.82         | weak      |
| 12 | dASP2 | HB    | DAP5  | HG1   | 5.22         | very weak |
| 13 | dASP2 | HB    | DAP5  | HN    | 5.00         | weak      |
| 14 | ALA3  | HA    | dASP2 | HN    | 6.17         | very weak |
| 15 | ALA3  | HA    | ALA3  | HN    | 4.46         | weak      |
| 16 | ALA3  | HA    | ALA4  | HN    | 4.91         | weak      |
| 17 | ALA3  | HA    | DAP5  | H1    | 5.50         | very weak |
| 18 | ALA3  | HA    | DAP5  | H2    | 5.99         | very weak |
| 19 | ALA3  | HA    | DAP5  | HN    | 5.53         | very weak |
| 20 | ALA3  | HB    | dASP2 | HN    | 5.86         | very weak |
| 21 | ALA3  | HB    | ALA3  | HN    | 4.40         | weak      |
| 22 | ALA3  | HN    | dASP2 | HN    | 4.39         | weak      |
| 23 | ALA3  | HN    | ALA4  | HN    | 4.68         | weak      |
| 24 | ALA4  | HA    | dASP2 | HN    | 6.17         | very weak |
| 25 | ALA4  | HA    | ALA3  | HN    | 6.57         | very weak |
| 26 | ALA4  | HA    | ALA4  | HN    | 4.34         | weak      |

|    |      |    |       |     |      |           |
|----|------|----|-------|-----|------|-----------|
| 27 | ALA4 | HA | DAP5  | H1  | 5.65 | very weak |
| 28 | ALA4 | HA | DAP5  | HN  | 4.63 | weak      |
| 29 | ALA4 | HB | ALA4  | HN  | 4.29 | weak      |
| 30 | ALA4 | HB | DAP5  | H1  | 6.25 | very weak |
| 31 | ALA4 | HB | DAP5  | HN  | 5.00 | weak      |
| 32 | DAP5 | H1 | ALA4  | HN  | 5.83 | very weak |
| 33 | DAP5 | H1 | DAP5  | H2  | 3.87 | weak      |
| 34 | DAP5 | H1 | DAP5  | HG1 | 5.50 | very weak |
| 35 | DAP5 | H1 | DAP5  | HN  | 4.65 | weak      |
| 36 | DAP5 | H2 | DAP5  | HG1 | 5.91 | very weak |
| 37 | DAP5 | HA | ALA4  | HN  | 6.23 | very weak |
| 38 | DAP5 | HA | DAP5  | H1  | 4.65 | weak      |
| 39 | DAP5 | HA | DAP5  | H2  | 5.53 | very weak |
| 40 | DAP5 | HA | DAP5  | HG1 | 5.45 | very weak |
| 41 | DAP5 | HA | DAP5  | HN  | 4.18 | weak      |
| 42 | DAP5 | HB | dASP2 | HN  | 6.00 | very weak |
| 43 | DAP5 | HB | ALA4  | HN  | 5.99 | very weak |
| 44 | DAP5 | HB | DAP5  | H1  | 6.07 | very weak |
| 45 | DAP5 | HB | DAP5  | H1  | 5.20 | very weak |
| 46 | DAP5 | HB | DAP5  | H1  | 5.99 | very weak |
| 47 | DAP5 | HB | DAP5  | H2  | 6.18 | very weak |
| 48 | DAP5 | HB | DAP5  | HG1 | 4.65 | weak      |
| 49 | DAP5 | HB | DAP5  | HG1 | 3.95 | weak      |
| 50 | DAP5 | HB | DAP5  | HN  | 5.83 | very weak |
| 51 | DAP5 | HB | DAP5  | HN  | 4.29 | weak      |
| 52 | DAP5 | HN | ALA4  | HN  | 4.45 | weak      |
| 53 | DAP5 | HN | DAP5  | HG1 | 5.44 | very weak |

**Table S16.** Restraints used to calculate the structure of **18** Ac-[eAADap]-NH<sub>2</sub> in H<sub>2</sub>O:D<sub>2</sub>O (9:1).

|    | RES1  | ATOM1 | RES2  | ATOM2 | DISTANCE (Å) | CLASS     |
|----|-------|-------|-------|-------|--------------|-----------|
| 1  | ACE1  | HA    | dGLU2 | HN    | 4.07         | weak      |
| 2  | ACE1  | HA    | ALA3  | HN    | 5.31         | very weak |
| 3  | ACE1  | HA    | ALA4  | HN    | 6.64         | very weak |
| 4  | dGLU2 | HA    | dGLU2 | HN    | 4.50         | weak      |
| 5  | dGLU2 | HA    | ALA3  | HN    | 4.81         | weak      |
| 6  | dGLU2 | HA    | ALA4  | HN    | 5.30         | very weak |
| 7  | dGLU2 | HA    | DAP5  | H1    | 6.05         | very weak |
| 8  | dGLU2 | HA    | DAP5  | H2    | 6.74         | very weak |
| 9  | dGLU2 | HA    | DAP5  | HG1   | 5.07         | very weak |
| 10 | dGLU2 | HA    | DAP5  | HN    | 5.75         | very weak |
| 11 | dGLU2 | HB    | dGLU2 | HN    | 4.50         | weak      |
| 12 | dGLU2 | HB    | dGLU2 | HN    | 4.66         | weak      |
| 13 | dGLU2 | HB    | ALA3  | HN    | 5.15         | very weak |
| 14 | dGLU2 | HB    | ALA4  | HN    | 5.42         | very weak |
| 15 | dGLU2 | HB    | DAP5  | HG1   | 6.23         | very weak |
| 16 | dGLU2 | HB    | DAP5  | HN    | 5.96         | very weak |
| 17 | dGLU2 | HG    | dGLU2 | HN    | 6.78         | very weak |
| 18 | dGLU2 | HG    | dGLU2 | HN    | 5.78         | very weak |
| 19 | dGLU2 | HG    | ALA3  | HN    | 5.39         | very weak |
| 20 | dGLU2 | HG    | ALA3  | HN    | 7.26         | very weak |
| 21 | dGLU2 | HG    | ALA4  | HN    | 6.45         | very weak |
| 22 | dGLU2 | HG    | ALA4  | HN    | 8.04         | very weak |
| 23 | dGLU2 | HG    | DAP5  | H1    | 6.14         | very weak |
| 24 | dGLU2 | HG    | DAP5  | HG1   | 3.99         | weak      |
| 25 | dGLU2 | HG    | DAP5  | HG1   | 4.72         | weak      |
| 26 | dGLU2 | HG    | DAP5  | HN    | 6.17         | very weak |
| 27 | dGLU2 | HG    | DAP5  | HN    | 6.05         | very weak |
| 28 | ALA3  | HA    | dGLU2 | HN    | 5.88         | very weak |

|    |       |    |       |     |         |           |
|----|-------|----|-------|-----|---------|-----------|
| 29 | ALA3  | HA | ALA3  | HN  | 4.31    | weak      |
| 30 | ALA3  | HA | ALA4  | HN  | 4.89    | weak      |
| 31 | ALA3  | HA | DAP5  | H1  | 5.30    | very weak |
| 32 | ALA3  | HA | DAP5  | H2  | 5.53    | very weak |
| 33 | ALA3  | HA | DAP5  | HN  | 5.42    | very weak |
| 34 | ALA3  | HB | ALA3  | HN  | 4.35    | weak      |
| 35 | ALA3  | HB | ALA4  | HN  | 4.98    | weak      |
| 36 | ALA3  | HN | dGLU2 | HN  | 4.50    | weak      |
| 37 | ALA3  | HN | ALA4  | HN  | 4.60    | weak      |
| 38 | ALA4  | HA | ALA3  | HN  | 6.27    | very weak |
| 39 | ALA4  | HA | ALA4  | HN  | 4.34    | weak      |
| 40 | ALA4  | HA | DAP5  | H1  | 5.74    | very weak |
| 41 | ALA4  | HA | DAP5  | H2  | 6.91    | very weak |
| 42 | ALA4  | HA | DAP5  | HG1 | 6.26    | very weak |
| 43 | ALA4  | HA | DAP5  | HN  | 4.39    | weak      |
| 44 | ALA4  | HB | ALA3  | HN  | 4.76    | weak      |
| 45 | ALA4  | HB | ALA4  | HN  | 4.41    | weak      |
| 46 | ALA4  | HB | DAP5  | H1  | 6.42    | very weak |
| 47 | ALA4  | HB | DAP5  | HN  | 5.03    | very weak |
| 48 | DAP5  | H1 | DAP5  | H2  | 3.94    | weak      |
| 49 | DAP5  | H1 | DAP5  | HG1 | 5.49    | very weak |
| 50 | DAP5  | H1 | DAP5  | HN  | 4.63    | weak      |
| 51 | DAP5  | H2 | DAP5  | HG1 | 6.40    | very weak |
| 52 | DAP5  | H2 | DAP5  | HN  | 5.82    | very weak |
| 53 | DAP5  | HA | ALA3  | HN  | 6.60    | very weak |
| 54 | DAP5  | HA | ALA4  | HN  | 6.35    | very weak |
| 55 | DAP5  | HA | DAP5  | H1  | 4.61    | weak      |
| 56 | DAP5  | HA | DAP5  | H2  | 5.45    | very weak |
| 57 | DAP5  | HA | DAP5  | HG1 | 5.85    | very weak |
| 58 | DAP5  | HA | DAP5  | HN  | 4.08    | weak      |
| 59 | DAP5  | HB | ALA4  | HN  | 6.50    | very weak |
| 60 | DAP5  | HB | DAP5  | H1  | 5.58    | very weak |
| 61 | DAP5  | HB | DAP5  | H1  | 5.72    | very weak |
| 62 | DAP5  | HB | DAP5  | H2  | 6.37    | very weak |
| 63 | DAP5  | HB | DAP5  | H2  | 6.21    | very weak |
| 64 | DAP5  | HB | DAP5  | HG1 | 5.28    | very weak |
| 65 | DAP5  | HB | DAP5  | HG1 | 3.85    | weak      |
| 66 | DAP5  | HB | DAP5  | HN  | 4.36    | weak      |
| 67 | DAP5  | HB | DAP5  | HN  | 5.06    | very weak |
| 68 | DAP5  | HN | ALA4  | HN  | 4.55    | weak      |
| 69 | dGLU2 | O  | DAP5  | H1  | 1.6-2.2 | H-bond    |
| 70 | DAP5  | O  | ALA4  | NT  | 2.6-3.2 | H-bond    |

**Table S17.** Restraints used to calculate the structure of **19** Ac-[dAADab]-NH<sub>2</sub> in H<sub>2</sub>O:D<sub>2</sub>O (9:1).

|    | RES1  | ATOM1 | RES2  | ATOM2 | DISTANCE (Å) | CLASS     |
|----|-------|-------|-------|-------|--------------|-----------|
| 1  | ACE1  | HA    | dASP2 | HN    | 4.31         | weak      |
| 2  | ACE1  | HA    | ALA3  | HN    | 5.51         | very weak |
| 3  | dASP2 | HA    | dASP2 | HN    | 4.19         | weak      |
| 4  | dASP2 | HA    | ALA3  | HN    | 4.78         | weak      |
| 5  | dASP2 | HB    | dASP2 | HN    | 4.73         | weak      |
| 6  | dASP2 | HB    | dASP2 | HN    | 4.61         | weak      |
| 7  | dASP2 | HB    | ALA3  | HN    | 5.91         | very weak |
| 8  | dASP2 | HB    | ALA4  | HN    | 5.28         | very weak |
| 9  | dASP2 | HB    | DAB5  | HD1   | 4.00         | weak      |
| 10 | dASP2 | HB    | DAB5  | HD1   | 4.75         | weak      |
| 11 | dASP2 | HB    | DAB5  | HN    | 5.34         | very weak |
| 12 | ALA3  | HA    | ALA3  | HN    | 4.44         | weak      |
| 13 | ALA3  | HA    | ALA4  | HN    | 4.98         | weak      |

|    |       |    |       |     |         |           |
|----|-------|----|-------|-----|---------|-----------|
| 14 | ALA3  | HA | DAB5  | H1  | 5.62    | very weak |
| 15 | ALA3  | HA | DAB5  | H2  | 5.88    | very weak |
| 16 | ALA3  | HA | DAB5  | HN  | 5.30    | very weak |
| 17 | ALA3  | HB | ALA3  | HN  | 4.68    | weak      |
| 18 | ALA3  | HB | ALA4  | HN  | 5.21    | very weak |
| 19 | ALA3  | HN | dASP2 | HN  | 4.61    | weak      |
| 20 | ALA4  | HA | ALA4  | HN  | 4.42    | weak      |
| 21 | ALA4  | HB | ALA4  | HN  | 4.63    | weak      |
| 22 | ALA4  | HB | DAB5  | HN  | 5.29    | very weak |
| 23 | DAB5  | H1 | DAB5  | HN  | 4.89    | weak      |
| 24 | DAB5  | HA | DAB5  | H1  | 4.66    | weak      |
| 25 | DAB5  | HA | DAB5  | H2  | 5.05    | very weak |
| 26 | DAB5  | HA | DAB5  | HD1 | 5.26    | very weak |
| 27 | DAB5  | HA | DAB5  | HN  | 4.13    | weak      |
| 28 | DAB5  | HB | DAB5  | H1  | 5.25    | very weak |
| 29 | DAB5  | HB | DAB5  | H1  | 6.01    | very weak |
| 30 | DAB5  | HB | DAB5  | H2  | 5.87    | very weak |
| 31 | DAB5  | HB | DAB5  | HD1 | 5.30    | very weak |
| 32 | DAB5  | HB | DAB5  | HD1 | 5.32    | very weak |
| 33 | DAB5  | HB | DAB5  | HN  | 5.76    | very weak |
| 34 | DAB5  | HB | DAB5  | HN  | 4.68    | weak      |
| 35 | DAB5  | HG | DAB5  | HD1 | 4.11    | weak      |
| 36 | DAB5  | HG | DAB5  | HD1 | 4.14    | weak      |
| 37 | DAB5  | HG | DAB5  | HN  | 4.85    | weak      |
| 38 | DAB5  | HN | ALA4  | HN  | 4.53    | weak      |
| 39 | DAB5  | HN | DAB5  | HD1 | 4.86    | weak      |
| 40 | dASP2 | O  | DAB5  | HN  | 1.6-2.2 | H-bond    |
| 41 | dASP2 | O  | DAB5  | N   | 2.6-3.2 | H-bond    |
| 42 | ALA3  | O  | DAB5  | H1  | 1.6-2.2 | H-bond    |
| 43 | ALA3  | O  | DAB5  | NT  | 2.6-3.2 | H-bond    |

**Table S18.** Restraints used to calculate the structure of **20** Ac-[dAAO]-NH<sub>2</sub> in H<sub>2</sub>O:D<sub>2</sub>O (9:1).

|    | RES1  | ATOM1 | RES2  | ATOM2 | DISTANCE (Å) | CLASS     |
|----|-------|-------|-------|-------|--------------|-----------|
| 1  | ACE1  | HA    | dASP2 | HN    | 4.39         | weak      |
| 2  | ACE1  | HA    | ALA3  | HN    | 5.77         | very weak |
| 3  | ACE1  | HA    | ALA4  | HN    | 6.35         | very weak |
| 4  | dASP2 | HA    | dASP2 | HN    | 4.87         | weak      |
| 5  | dASP2 | HA    | ALA3  | HN    | 5.45         | very weak |
| 6  | dASP2 | HA    | ALA4  | HN    | 4.41         | weak      |
| 7  | dASP2 | HA    | ORN5  | HN    | 5.63         | very weak |
| 8  | dASP2 | HB    | dASP2 | HN    | 5.37         | very weak |
| 9  | dASP2 | HB    | dASP2 | HN    | 4.91         | weak      |
| 10 | dASP2 | HB    | ALA3  | HN    | 4.71         | weak      |
| 11 | dASP2 | HB    | ALA3  | HN    | 5.96         | very weak |
| 12 | dASP2 | HB    | ALA4  | HN    | 6.26         | very weak |
| 13 | dASP2 | HB    | ORN5  | HE1   | 4.23         | weak      |
| 14 | dASP2 | HB    | ORN5  | HN    | 6.63         | very weak |
| 15 | ALA3  | HA    | ALA3  | HN    | 4.50         | weak      |
| 16 | ALA3  | HA    | ALA4  | HN    | 4.74         | weak      |
| 17 | ALA3  | HB    | ALA3  | HN    | 4.74         | weak      |
| 18 | ALA3  | HB    | ALA4  | HN    | 5.46         | very weak |
| 19 | ALA3  | HN    | dASP2 | HN    | 4.53         | weak      |
| 20 | ALA3  | HN    | ALA4  | HN    | 4.75         | weak      |
| 21 | ALA4  | HA    | ALA3  | HN    | 6.63         | very weak |
| 22 | ALA4  | HA    | ALA4  | HN    | 4.40         | weak      |
| 23 | ALA4  | HA    | ORN5  | H1    | 5.69         | very weak |
| 24 | ALA4  | HA    | ORN5  | H2    | 5.58         | very weak |
| 25 | ALA4  | HA    | ORN5  | HN    | 4.66         | weak      |

|    |       |    |       |     |         |           |
|----|-------|----|-------|-----|---------|-----------|
| 26 | ALA4  | HB | ALA3  | HN  | 6.63    | very weak |
| 27 | ALA4  | HB | ALA4  | HN  | 4.79    | weak      |
| 28 | ALA4  | HB | ORN5  | HN  | 5.51    | very weak |
| 29 | ALA4  | HN | dASP2 | HN  | 4.96    | weak      |
| 30 | ORN5  | H1 | ORN5  | HN  | 5.13    | very weak |
| 31 | ORN5  | HA | ORN5  | H1  | 4.80    | weak      |
| 32 | ORN5  | HA | ORN5  | H2  | 5.19    | very weak |
| 33 | ORN5  | HA | ORN5  | HN  | 4.40    | weak      |
| 34 | ORN5  | HB | ALA3  | HN  | 7.02    | very weak |
| 35 | ORN5  | HB | ALA4  | HN  | 6.18    | very weak |
| 36 | ORN5  | HB | ORN5  | HE1 | 4.68    | weak      |
| 37 | ORN5  | HB | ORN5  | H1  | 6.02    | very weak |
| 38 | ORN5  | HB | ORN5  | H2  | 6.10    | very weak |
| 39 | ORN5  | HB | ORN5  | HN  | 4.32    | weak      |
| 40 | ORN5  | HD | dASP2 | HN  | 6.42    | very weak |
| 41 | ORN5  | HD | ALA4  | HN  | 6.13    | very weak |
| 42 | ORN5  | HD | ORN5  | HE1 | 4.75    | weak      |
| 43 | ORN5  | HD | ORN5  | HE1 | 4.35    | weak      |
| 44 | ORN5  | HD | ORN5  | HN  | 4.94    | weak      |
| 45 | ORN5  | HG | ORN5  | HE1 | 5.64    | very weak |
| 46 | ORN5  | HG | ORN5  | H1  | 6.04    | very weak |
| 47 | ORN5  | HG | ORN5  | H2  | 6.18    | very weak |
| 48 | ORN5  | HG | ORN5  | HN  | 6.50    | very weak |
| 49 | ORN5  | HN | ALA3  | HN  | 6.02    | very weak |
| 50 | ORN5  | HN | ALA4  | HN  | 4.69    | weak      |
| 51 | ORN5  | HN | ORN5  | HE1 | 6.21    | very weak |
| 52 | dASP2 | O  | ORN5  | HN  | 1.6-2.2 | H-bond    |
| 53 | dASP2 | O  | ORN5  | N   | 2.6-3.2 | H-bond    |
| 54 | ALA3  | O  | ORN5  | H1  | 1.6-2.2 | H-bond    |
| 55 | ALA3  | O  | ORN5  | NT  | 2.6-3.2 | H-bond    |

**Table S19.** Restraints used to calculate the structure of **21** Ac-[IsoDAADap]-NH<sub>2</sub> in H<sub>2</sub>O:D<sub>2</sub>O (9:1).

|    | RES1 | ATOM1 | RES2  | ATOM2 | DISTANCE (Å) | CLASS     |
|----|------|-------|-------|-------|--------------|-----------|
| 1  | ACE1 | HA    | dASP2 | HN    | 4.2          | weak      |
| 2  | ASP2 | HB    | ALA3  | HN    | 3.7          | medium    |
| 3  | ALA3 | HA    | ALA4  | HN    | 5.0          | weak      |
| 4  | ALA3 | HA    | DAP5  | HN    | 6.0          | Very weak |
| 5  | ALA3 | HA    | DAP5  | H1    | 6.0          | Very weak |
| 6  | ALA3 | HN    | ALA4  | HN    | 5.0          | weak      |
| 7  | ALA4 | HA    | DAP5  | HN    | 3.5          | medium    |
| 8  | ALA4 | HA    | DAP5  | H1    | 6.0          | Very weak |
| 9  | ALA4 | HB*   | DAP5  | HN    | 4.5          | weak      |
| 10 | ALA4 | HN    | DAP5  | HN    | 2.7          | strong    |
| 11 | DAP5 | HA    | DAP5  | H2    | 6.0          | very weak |
| 12 | DAP5 | HA    | DAP5  | H1    | 3.5          | medium    |
| 13 | DAP5 | HB2   | DAP5  | H1    | 5.0          | weak      |
| 14 | DAP5 | HN    | ASP2  | HB*   | 7.0          | Very weak |
| 15 | DAP5 | HG    | DAP5  | H1    | 6.0          | very weak |
| 16 | DAP5 | HN    | DAP5  | H1    | 3.5          | medium    |

**Table S20.** Restraints used to calculate the structure of **22** Ac-[IsodAADap]-NH<sub>2</sub> in H<sub>2</sub>O:D<sub>2</sub>O (9:1).

|   | RES1 | ATOM1 | RES2  | ATOM2 | DISTANCE (Å) | CLASS     |
|---|------|-------|-------|-------|--------------|-----------|
| 1 | ACE1 | HA    | dASP2 | HN    | 4.2          | weak      |
| 2 | ACE1 | HA    | DAP5  | HN    | 6.5          | Very weak |
| 3 | ASP2 | HB    | ALA3  | HN    | 3.7          | medium    |

|    |      |      |       |      |     |           |
|----|------|------|-------|------|-----|-----------|
| 4  | ASP2 | HB11 | ALA3  | HN   | 2.7 | Strong    |
| 5  | ASP2 | HB11 | ALA4  | HN   | 5.0 | Weak      |
| 6  | ASP2 | HB11 | DAP5  | HG   | 6.0 | Very weak |
| 7  | ASP2 | HB12 | ALA3  | HN   | 3.5 | Medium    |
| 8  | ASP2 | HN   | DAP5  | HG   | 3.5 | Medium    |
| 9  | ASP2 | HN   | DAP5  | H1   | 6.0 | Weak      |
| 10 | ALA3 | HA   | ALA4  | HN   | 3.5 | Medium    |
| 11 | ALA3 | HA   | dASP2 | HN   | 6.0 | Very weak |
| 12 | ALA3 | HA   | DAP5  | H2   | 6.0 | Very weak |
| 13 | ALA3 | HN   | ALA4  | HN   | 3.5 | Medium    |
| 14 | ALA3 | HA   | DAP5  | H1   | 5.0 | Weak      |
| 15 | ALA3 | HN   | DAP5  | HN   | 6.0 | Very weak |
| 16 | ALA3 | HA   | dASP  | HB12 | 6.0 | Very weak |
| 17 | ALA4 | HA   | DAP5  | HN   | 3.5 | medium    |
| 18 | ALA4 | HA   | DAP5  | H1   | 6.0 | Very weak |
| 19 | ALA4 | HB   | DAP5  | HN   | 4.5 | weak      |
| 20 | ALA4 | HN   | DAP5  | HN   | 2.7 | strong    |
| 21 | DAP5 | HA   | DAP5  | H2   | 5.0 | weak      |
| 22 | DAP5 | HA   | DAP5  | H1   | 3.5 | medium    |
| 23 | DAP5 | HB2  | DAP5  | H1   | 5.0 | weak      |
| 24 | DAP5 | HB2  | DAP5  | H2   | 6.0 | Very weak |
| 25 | DAP5 | HN   | ASP2  | H2   | 5.0 | weak      |
| 26 | DAP5 | HG   | DAP5  | H1   | 6.0 | very weak |
| 27 | DAP5 | HG   | DAP5  | H2   | 5.0 | Weak      |
| 28 | DAP5 | HN   | DAP5  | H1   | 3.5 | medium    |

**Table S21.** Restraints used to calculate the structure of **23** [SuccAADap]-NH<sub>2</sub> in H<sub>2</sub>O:D<sub>2</sub>O (9:1).

|    | RES1  | ATOM1 | RES2  | ATOM2 | DISTANCE (Å) | CLASS     |
|----|-------|-------|-------|-------|--------------|-----------|
| 1  | SUCC1 | HZ1   | ALA2  | HN    | 2.7          | Strong    |
| 2  | SUCC1 | HE21  | ALA2  | HN    | 5.0          | weak      |
| 3  | SUCC1 | HZ2   | ALA2  | HN    | 5.0          | weak      |
| 4  | SUCC1 | HE21  | DAP4  | HG    | 2.7          | Strong    |
| 5  | SUCC1 | HZ1   | DAP4  | HN    | 6.0          | Very weak |
| 6  | SUCC1 | HE21  | DAP4  | HN    | 6.0          | Very weak |
| 7  | SUCC1 | HE22  | DAP4  | HG    | 5.0          | Weak      |
| 8  | ALA2  | HN    | ALA3  | HN    | 2.7          | Strong    |
| 9  | ALA2  | HN    | DAP4  | HN    | 5.0          | Weak      |
| 10 | ALA2  | HA    | ALA3  | HN    | 5.0          | Weak      |
| 11 | ALA2  | HA    | DAP4  | H2    | 6.0          | Very weak |
| 12 | ALA2  | HA    | DAP4  | H1    | 5.0          | Weak      |
| 13 | ALA2  | HA    | DAP4  | HN    | 6.0          | Very weak |
| 14 | ALA3  | HA    | DAP4  | HN    | 5.0          | Weak      |
| 15 | ALA3  | HN    | DAP4  | HN    | 2.7          | Strong    |
| 16 | ALA3  | HN    | DAP4  | HB1   | 6.0          | Very weak |
| 17 | ALA3  | HN    | SUCC1 | HZ1   | 6.0          | Very weak |
| 18 | DAP4  | HA    | ALA3  | HN    | 6.0          | Very weak |
| 19 | DAP4  | HA    | DAP4  | H2    | 5.0          | weak      |
| 20 | DAP4  | HA    | DAP4  | H1    | 3.5          | Medium    |
| 21 | DAP4  | HB1   | DAP4  | H1    | 6.0          | Very weak |
| 22 | DAP4  | HB1   | DAP4  | H2    | 6.0          | Very weak |
| 23 | DAP4  | HB2   | DAP4  | H1    | 5.0          | weak      |
| 24 | DAP4  | HB2   | DAP4  | H2    | 6.0          | Very weak |
| 25 | DAP4  | HN    | DAP4  | H2    | 5.0          | weak      |
| 26 | DAP4  | HN    | DAP4  | H1    | 3.5          | Medium    |

|    |      |    |      |    |     |           |
|----|------|----|------|----|-----|-----------|
| 27 | DAP4 | HG | DAP4 | H2 | 6.0 | Very Weak |
| 28 | DAP4 | HG | DAP4 | H1 | 5.0 | Weak      |
| 29 | DAP4 | HN | ALA3 | HB | 6.0 | Very weak |

**Table S22.** Restraints used to calculate the structure of **24** Ac-[GlutAADap]-NH<sub>2</sub> in H<sub>2</sub>O:D<sub>2</sub>O (9:1).

|    | RES1  | ATOM1 | RES2  | ATOM2 | DISTANCE (Å) | CLASS     |
|----|-------|-------|-------|-------|--------------|-----------|
| 1  | GLUT1 | HH1   | ALA2  | HN    | 2.7          | Strong    |
| 2  | GLUT1 | HZ1   | ALA2  | HN    | 6.0          | Very weak |
| 3  | GLUT1 | HH2   | ALA2  | HN    | 3.5          | Medium    |
| 4  | GLUT1 | HE21  | DAP4  | HG    | 5.0          | weak      |
| 5  | GLUT1 | HE22  | DAP4  | HG    | 6.0          | Very weak |
| 6  | GLUT1 | HH2   | DAP4  | HG    | 6.0          | Very weak |
| 7  | GLUT1 | HZ1   | DAP4  | HN    | 6.0          | Very weak |
| 8  | ALA2  | HN    | ALA3  | HN    | 2.7          | Strong    |
| 9  | ALA2  | HN    | DAP4  | HE22  | 5.0          | weak      |
| 10 | ALA2  | HA    | ALA3  | HN    | 3.5          | Medium    |
| 11 | ALA2  | HA    | DAP4  | HN    | 5.0          | weak      |
| 12 | ALA2  | HA    | DAP4  | H1    | 5.0          | weak      |
| 13 | ALA2  | HA    | DAP4  | H2    | 5.0          | weak      |
| 14 | ALA3  | HA    | DAP4  | H1    | 5.0          | weak      |
| 15 | ALA3  | HA    | DAP4  | H2    | 6.0          | Very weak |
| 16 | ALA3  | HA    | DAP4  | HN    | 3.5          | Medium    |
| 17 | ALA3  | HN    | GLUT1 | HH1   | 5.0          | weak      |
| 18 | ALA3  | HN    | GLUT1 | HE22  | 6.0          | Very weak |
| 19 | ALA3  | HN    | DAP4  | HN    | 2.7          | Strong    |
| 20 | ALA3  | HN    | DAP4  | H1    | 6.0          | Very weak |
| 21 | DAP4  | HN    | ALA3  | HB    | 6.0          | Very weak |
| 22 | DAP4  | HA    | DAP4  | H2    | 5.0          | weak      |
| 23 | DAP4  | HA    | DAP4  | H1    | 3.5          | Medium    |
| 24 | DAP4  | HB1   | DAP4  | H1    | 6.0          | Very weak |
| 25 | DAP4  | HB1   | DAP4  | H2    | 6.0          | Very weak |
| 26 | DAP4  | HB2   | DAP4  | H1    | 5.0          | weak      |
| 27 | DAP4  | HB2   | DAP4  | H2    | 6.0          | Very weak |
| 28 | DAP4  | HN    | GLUT1 | HE21  | 6.0          | Very weak |
| 29 | DAP4  | HN    | ALA2  | HB    | 7.5          | Medium    |
| 30 | DAP4  | HG    | GLUT1 | HZ2   | 5.0          | weak      |
| 31 | DAP4  | HG    | GLUT1 | HZ1   | 2.7          | Strong    |
| 32 | DAP4  | HN    | GLUT1 | HZ2   | 6.0          | Very weak |
| 33 | DAP4  | HG    | DAP4  | H1    | 5.0          | weak      |
| 34 | DAP4  | HN    | DAP4  | H1    | 2.7          | Strong    |

## 7.5 Molecular Dynamics Simulations

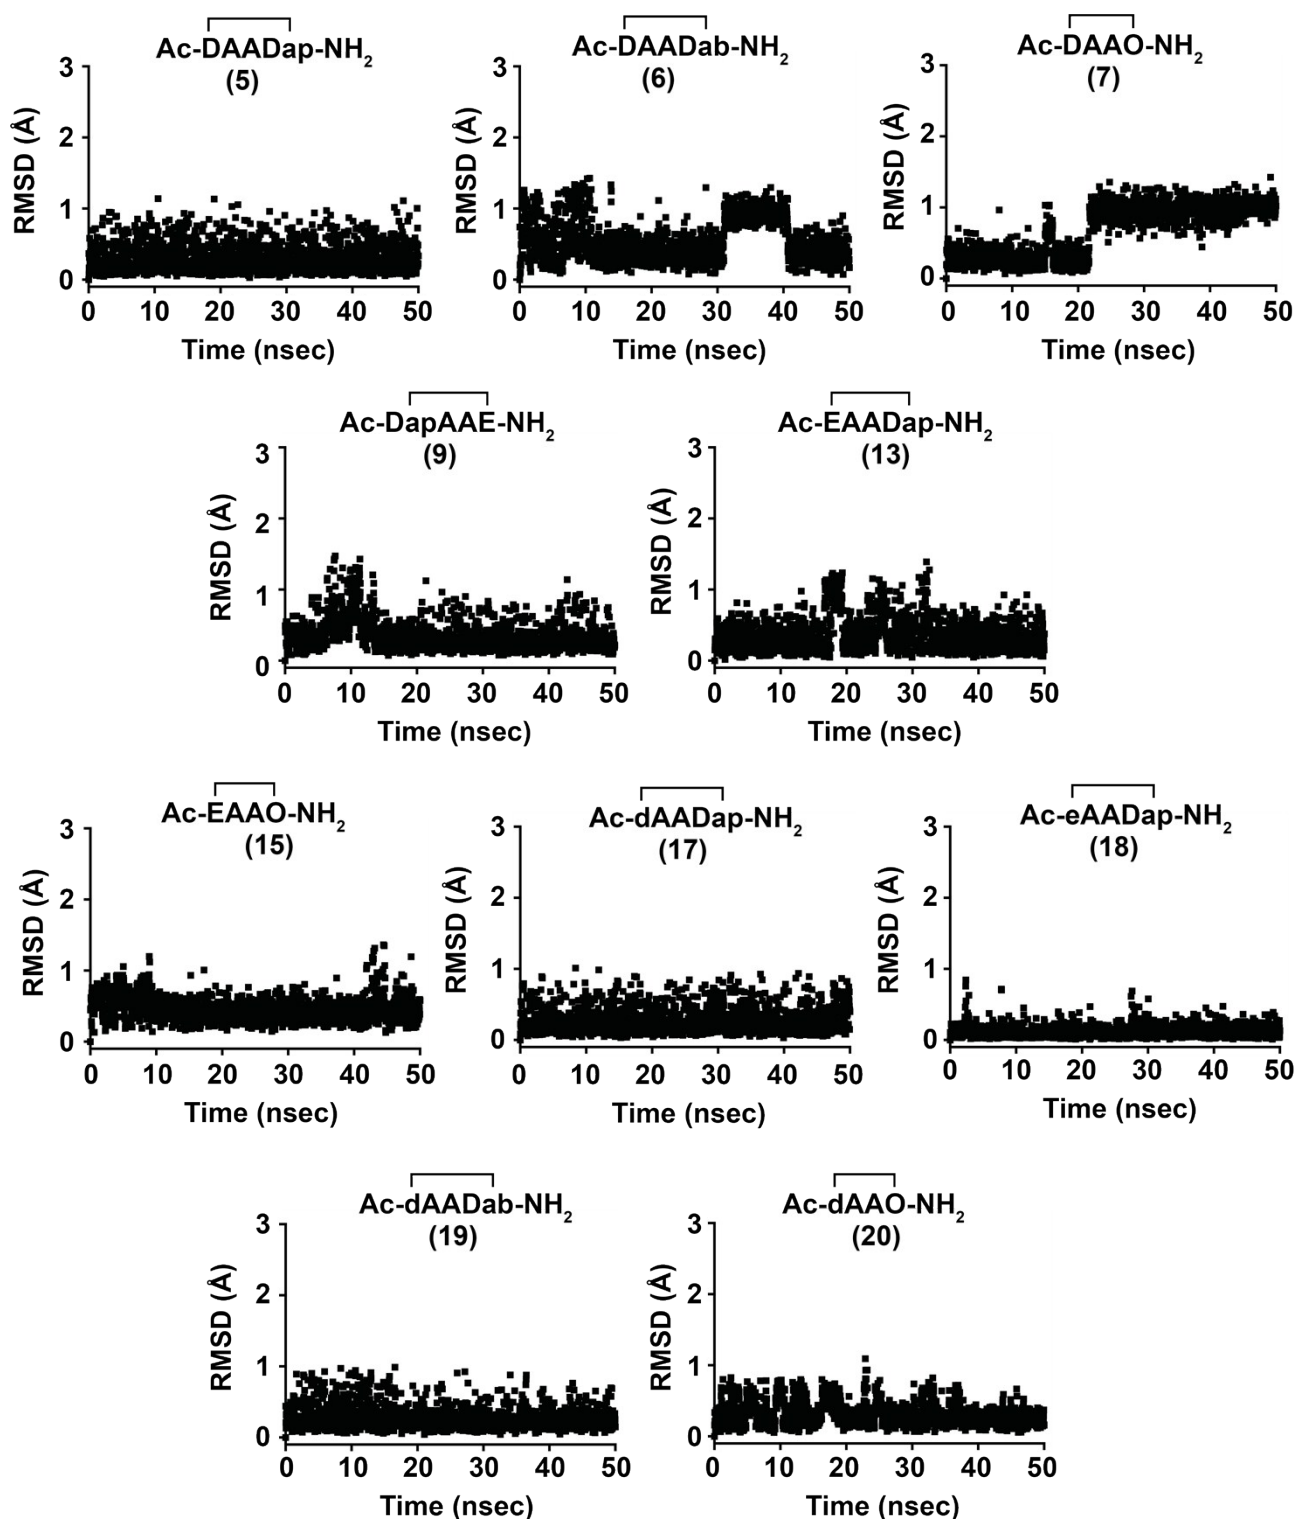

**Figure S25.** Molecular dynamics simulations (50 ns) of NMR structures (RMSD variations of backbones) in a water box model (TIP3P) at 300 K for peptides 5–7, 9, 13, 15, 17–20.



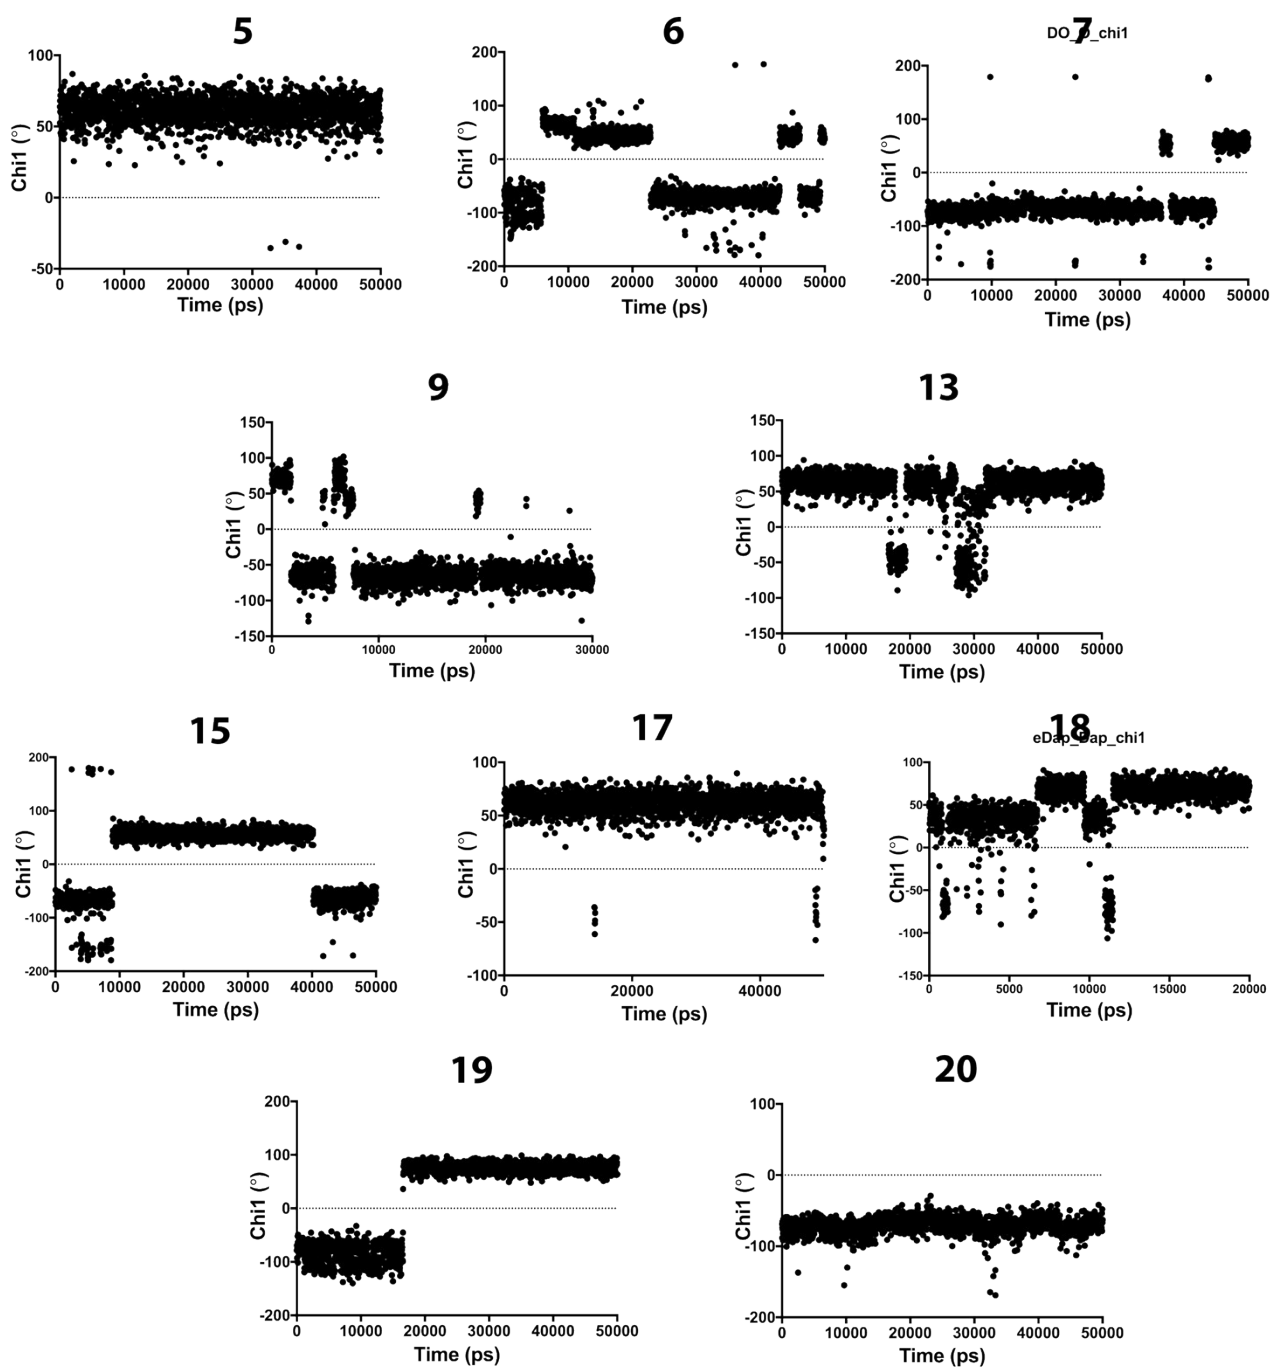

**Figure S26.** Molecular dynamics simulations (50 ns) of NMR structures (Chi1 angle for the 4<sup>th</sup> residue (Z)) in a water box model (TIP3P) at 300 K for peptides 5–7, 9, 13, 15, 17–20.

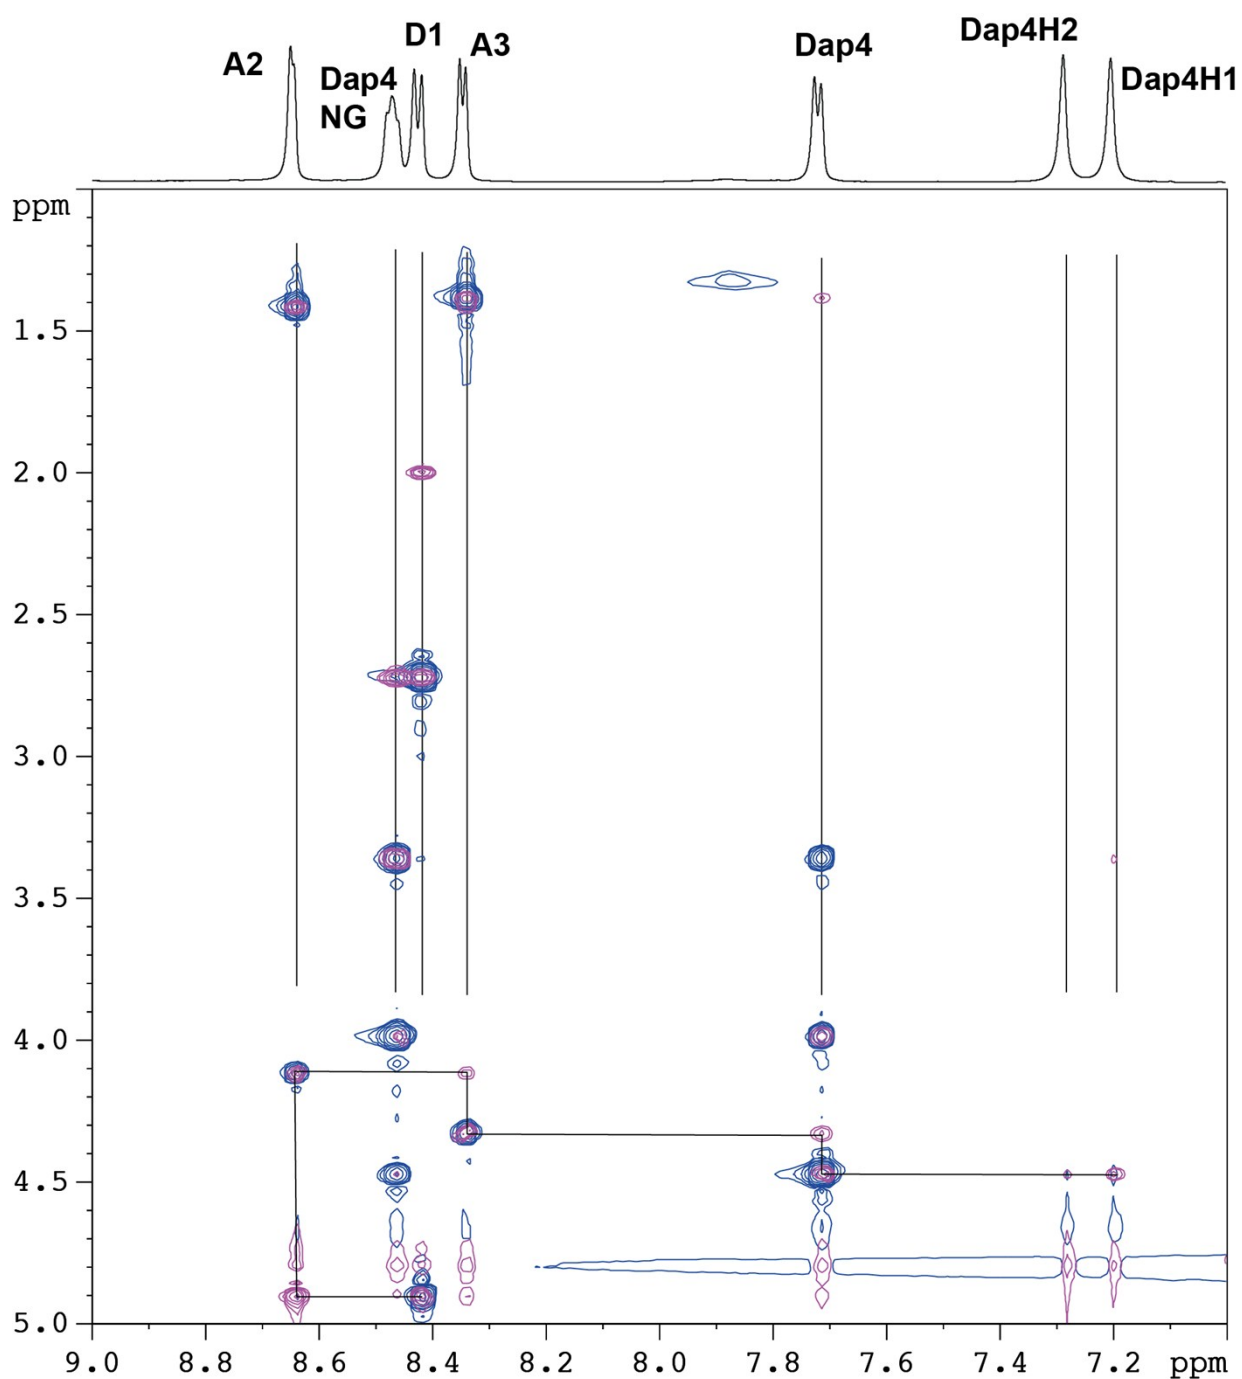

**Figure S27.** Skewers and sequential ROE walk for Ac-[DAADap]-NH<sub>2</sub> (**5**). (Blue = TOCSY spectrum, Red = ROESY spectrum).

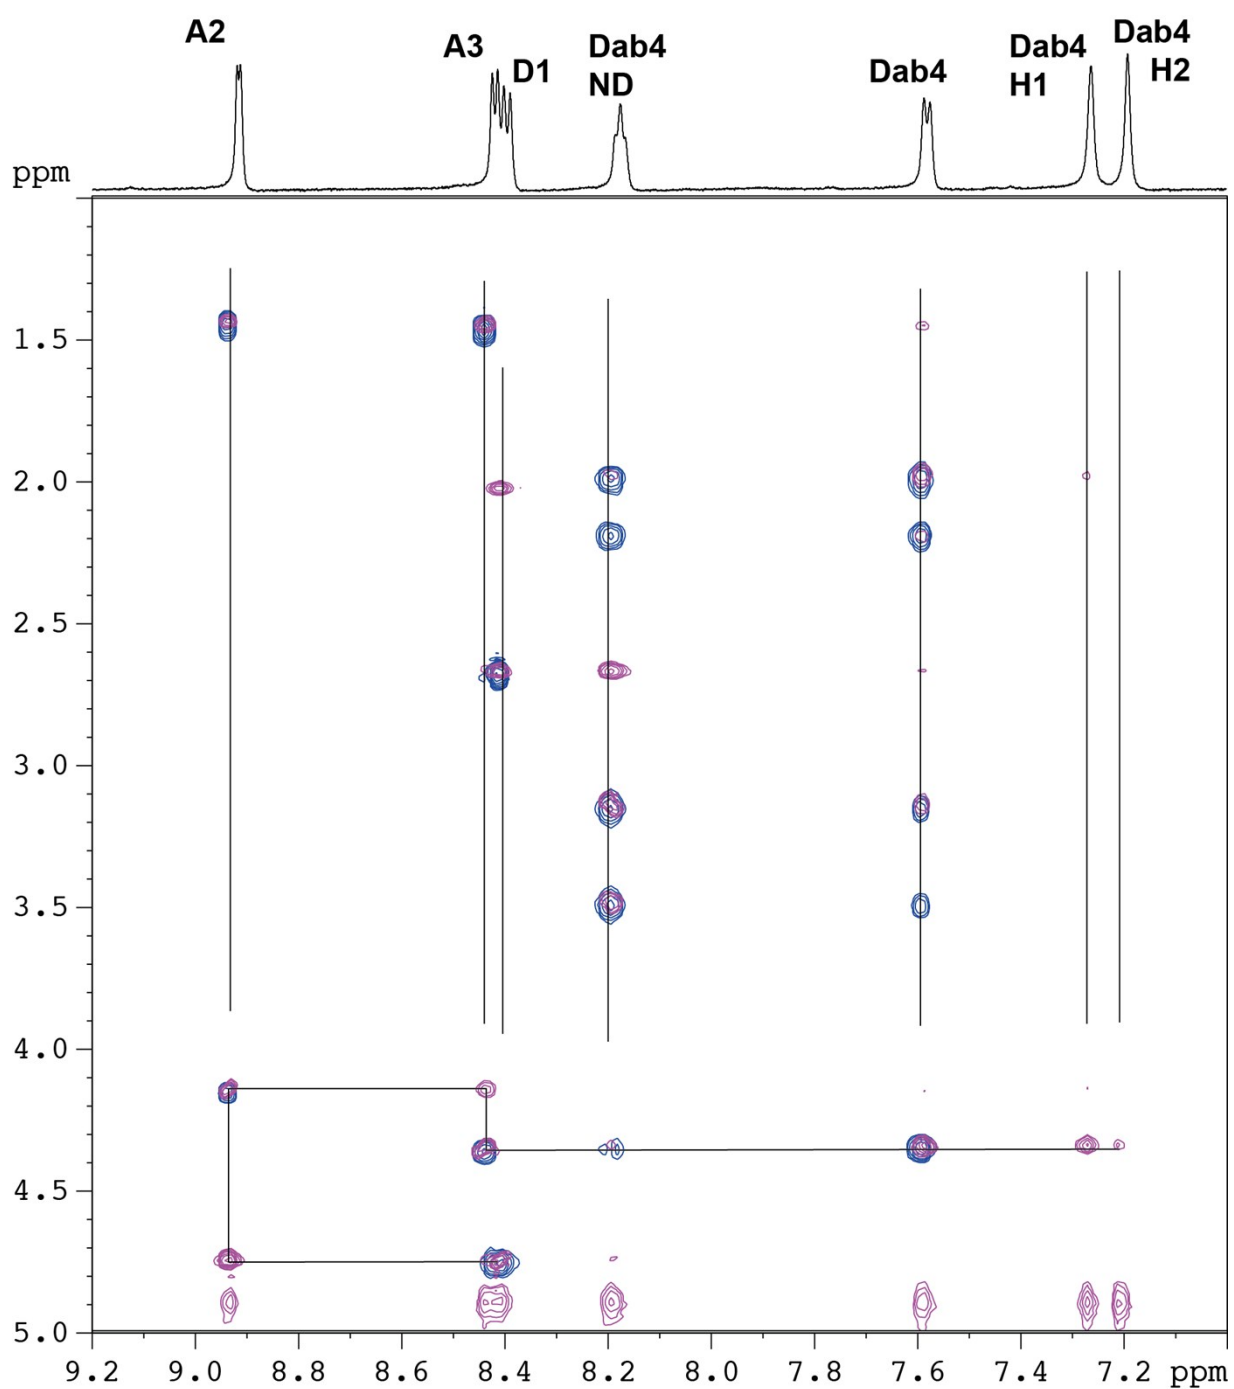

**Figure S28.** Skewers and sequential ROE walk for Ac-[DAADab]-NH<sub>2</sub> (6). (Blue = TOCSY spectrum, Red = ROESY spectrum).

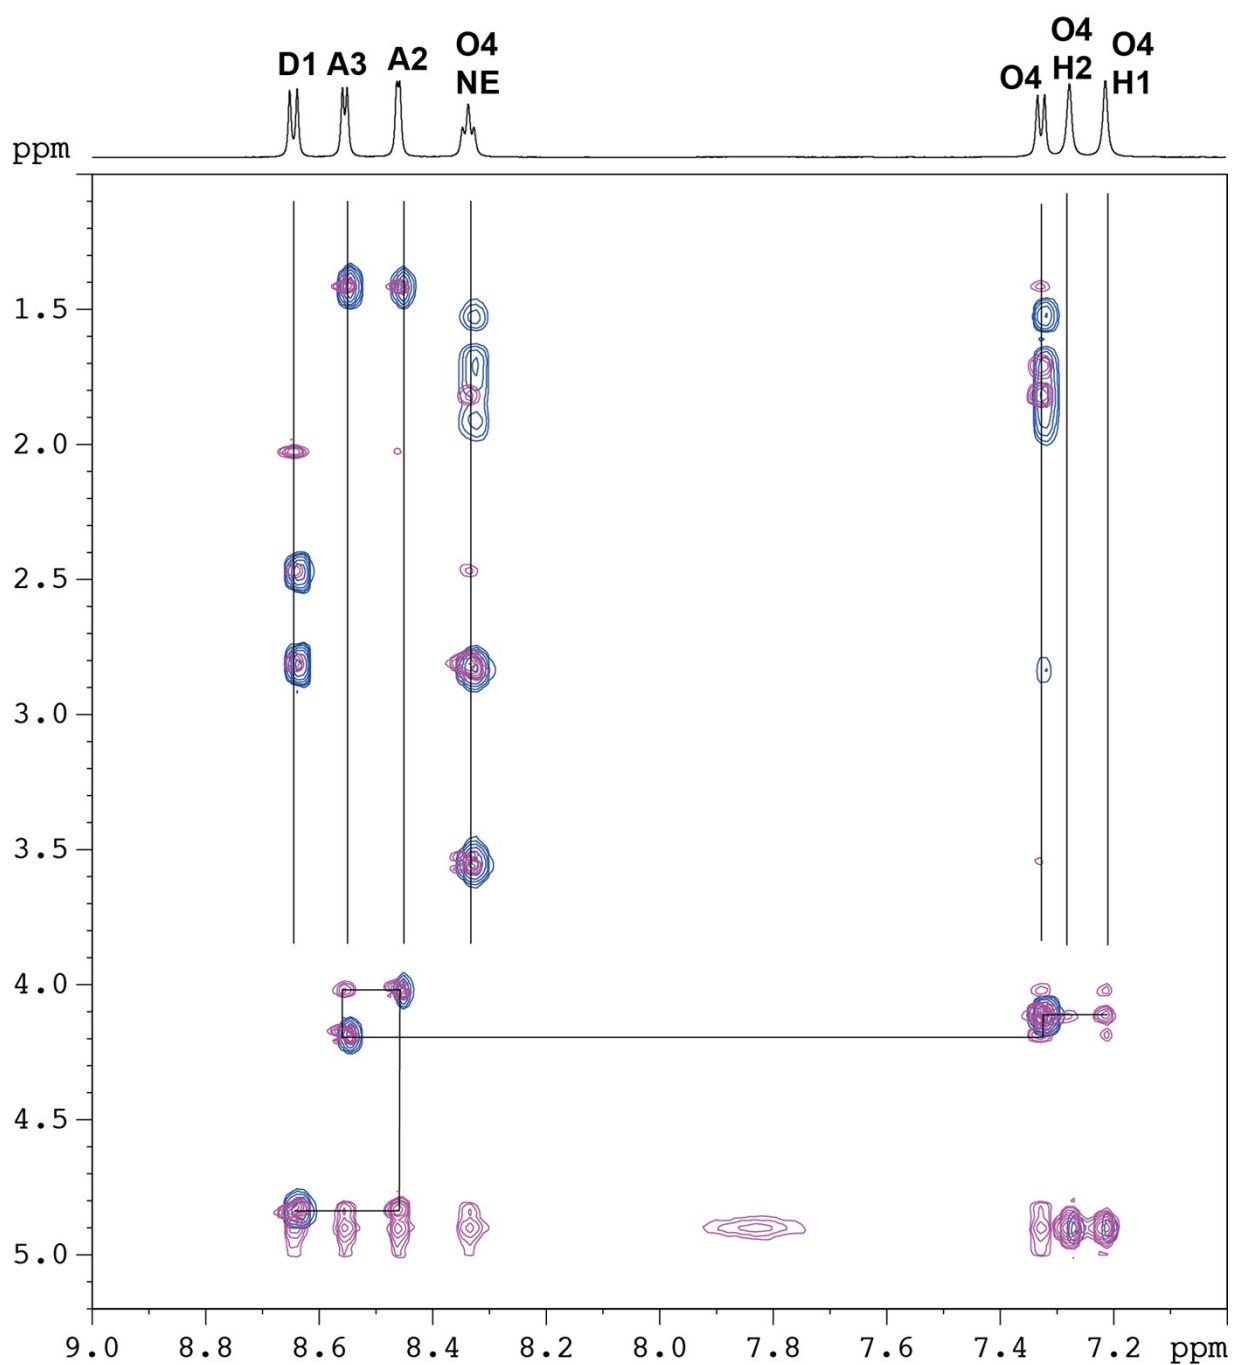

**Figure S29.** Skewers and sequential ROE walk for Ac-[DAAO]-NH<sub>2</sub> (7). (Blue = TOCSY spectrum, Red = ROESY spectrum).

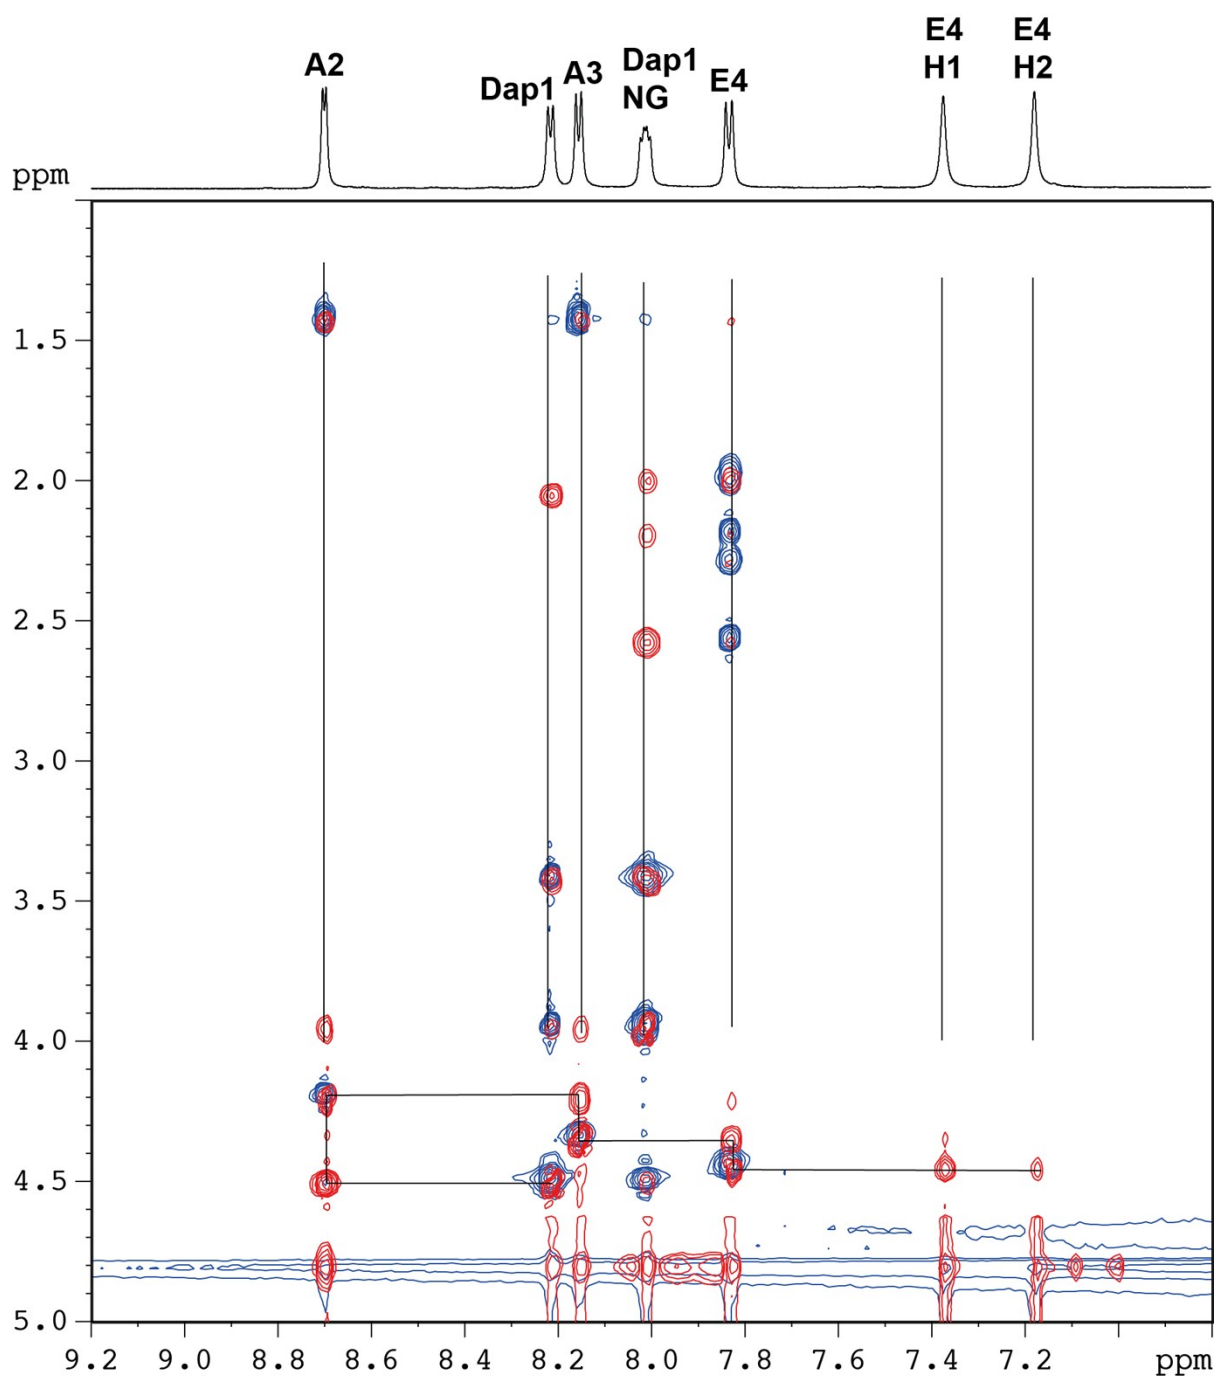

**Figure S30.** Skewers and sequential ROE walk for Ac-[DapAAE]-NH<sub>2</sub> (**9**). (Blue = TOCSY spectrum, Red = ROESY spectrum).

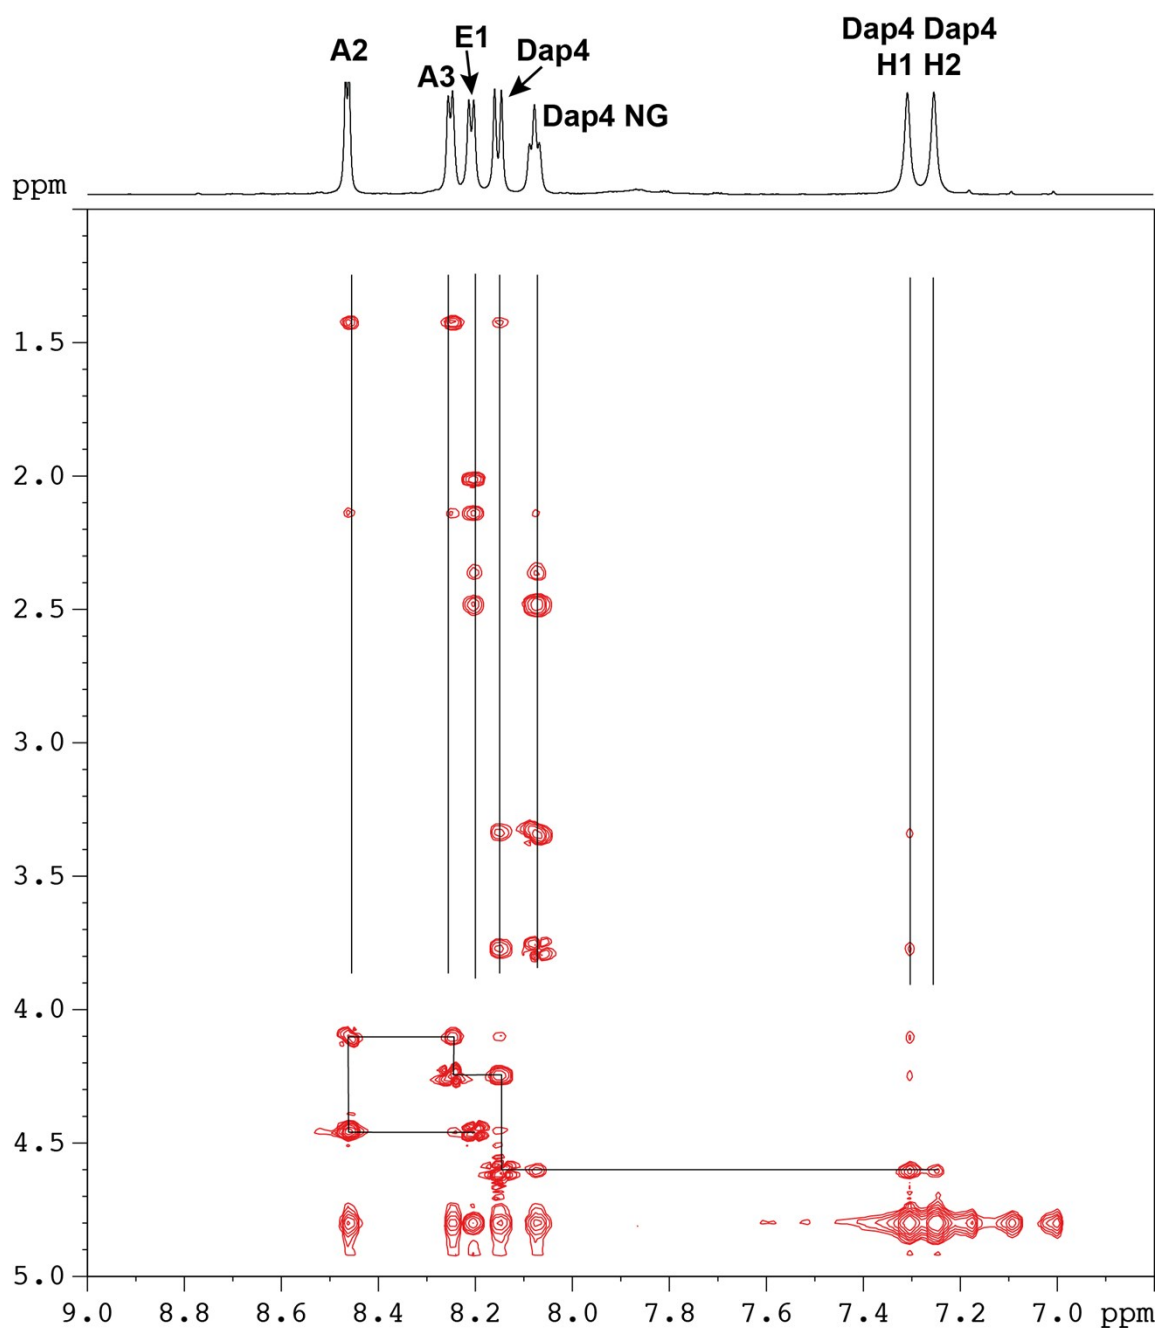

**Figure S31.** Skewers and sequential ROE walk for Ac-[EAADap]-NH<sub>2</sub> (**13**). (Blue = TOCSY spectrum, Red = ROESY spectrum).

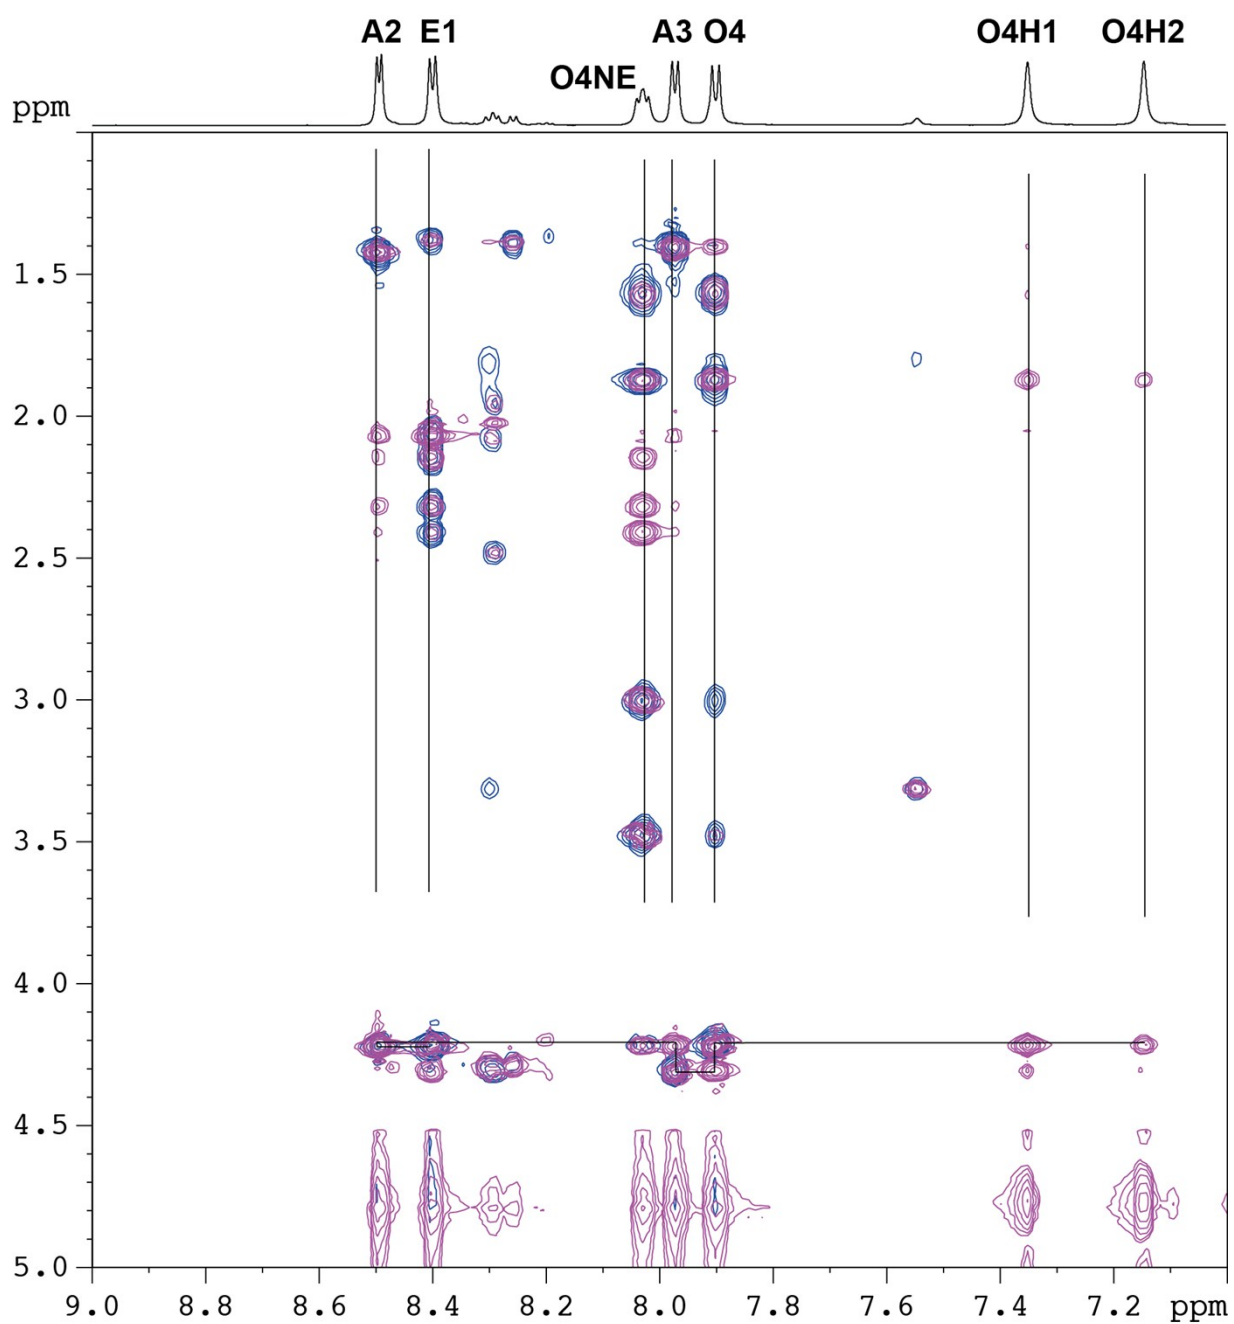

**Figure S32.** Skewers and sequential ROE walk for Ac-[EAAO]-NH<sub>2</sub> (**15**). (Blue = TOCSY spectrum, Red = ROESY spectrum).

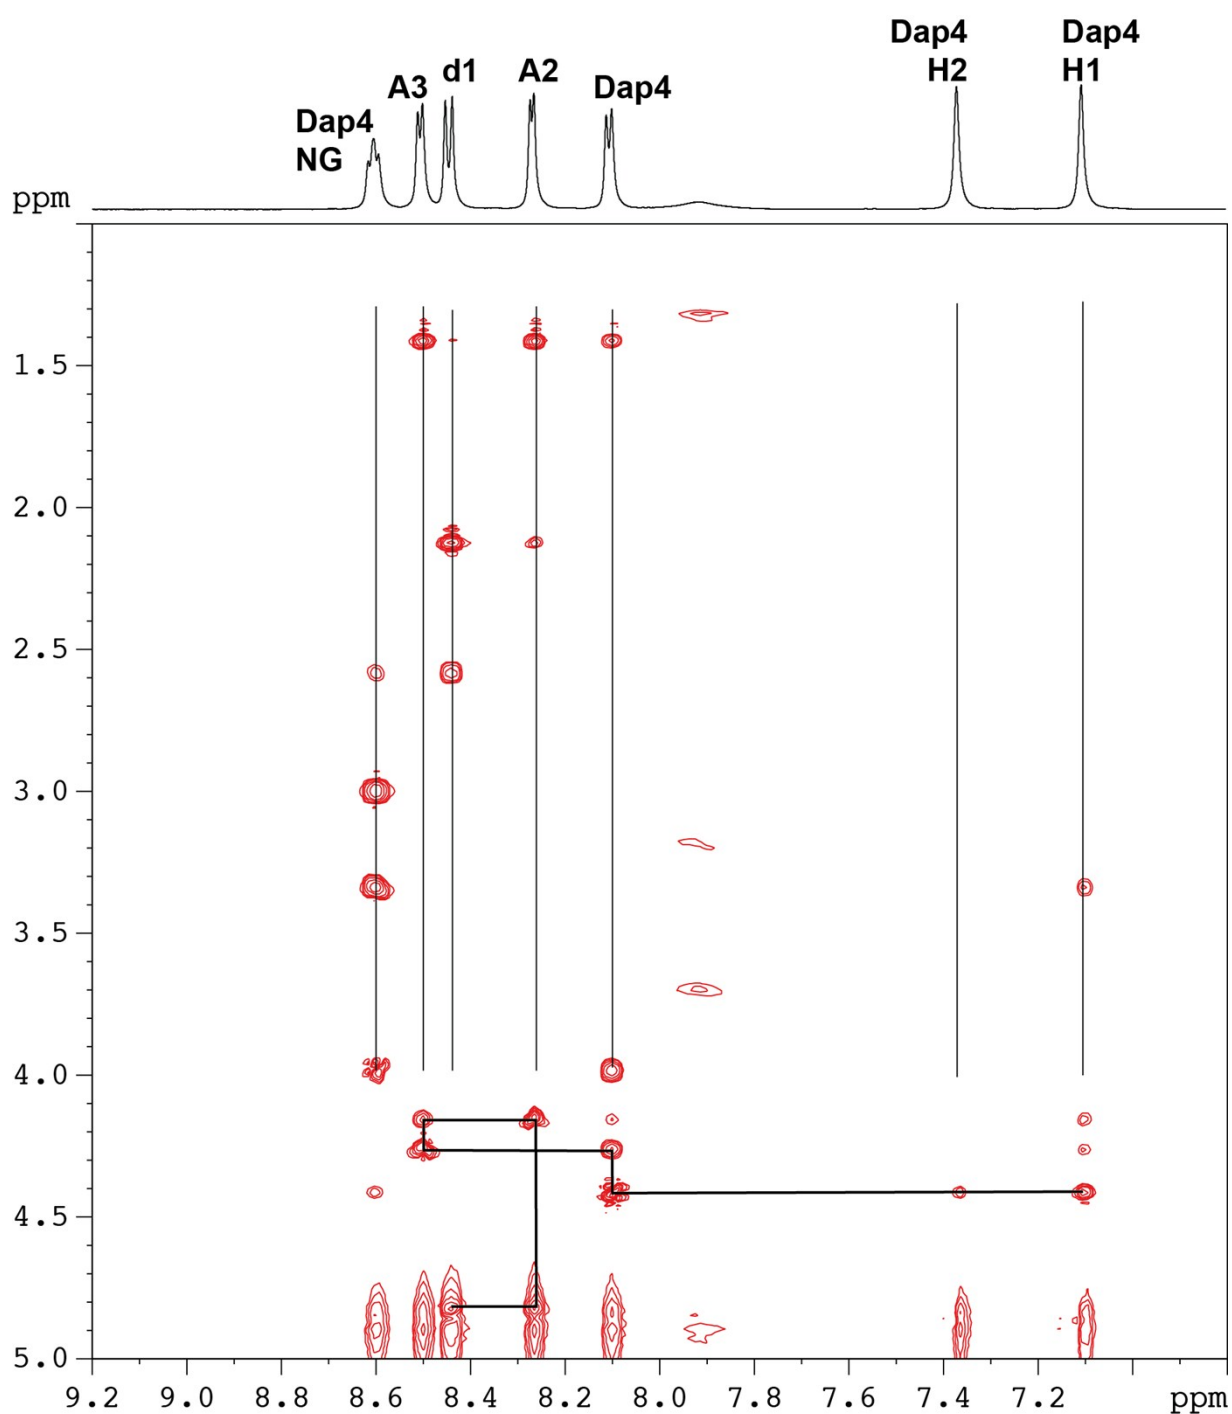

**Figure S33.** Skewers and sequential ROE walk for Ac-[dAADap]-NH<sub>2</sub> (**17**). (Red = ROESY spectrum).



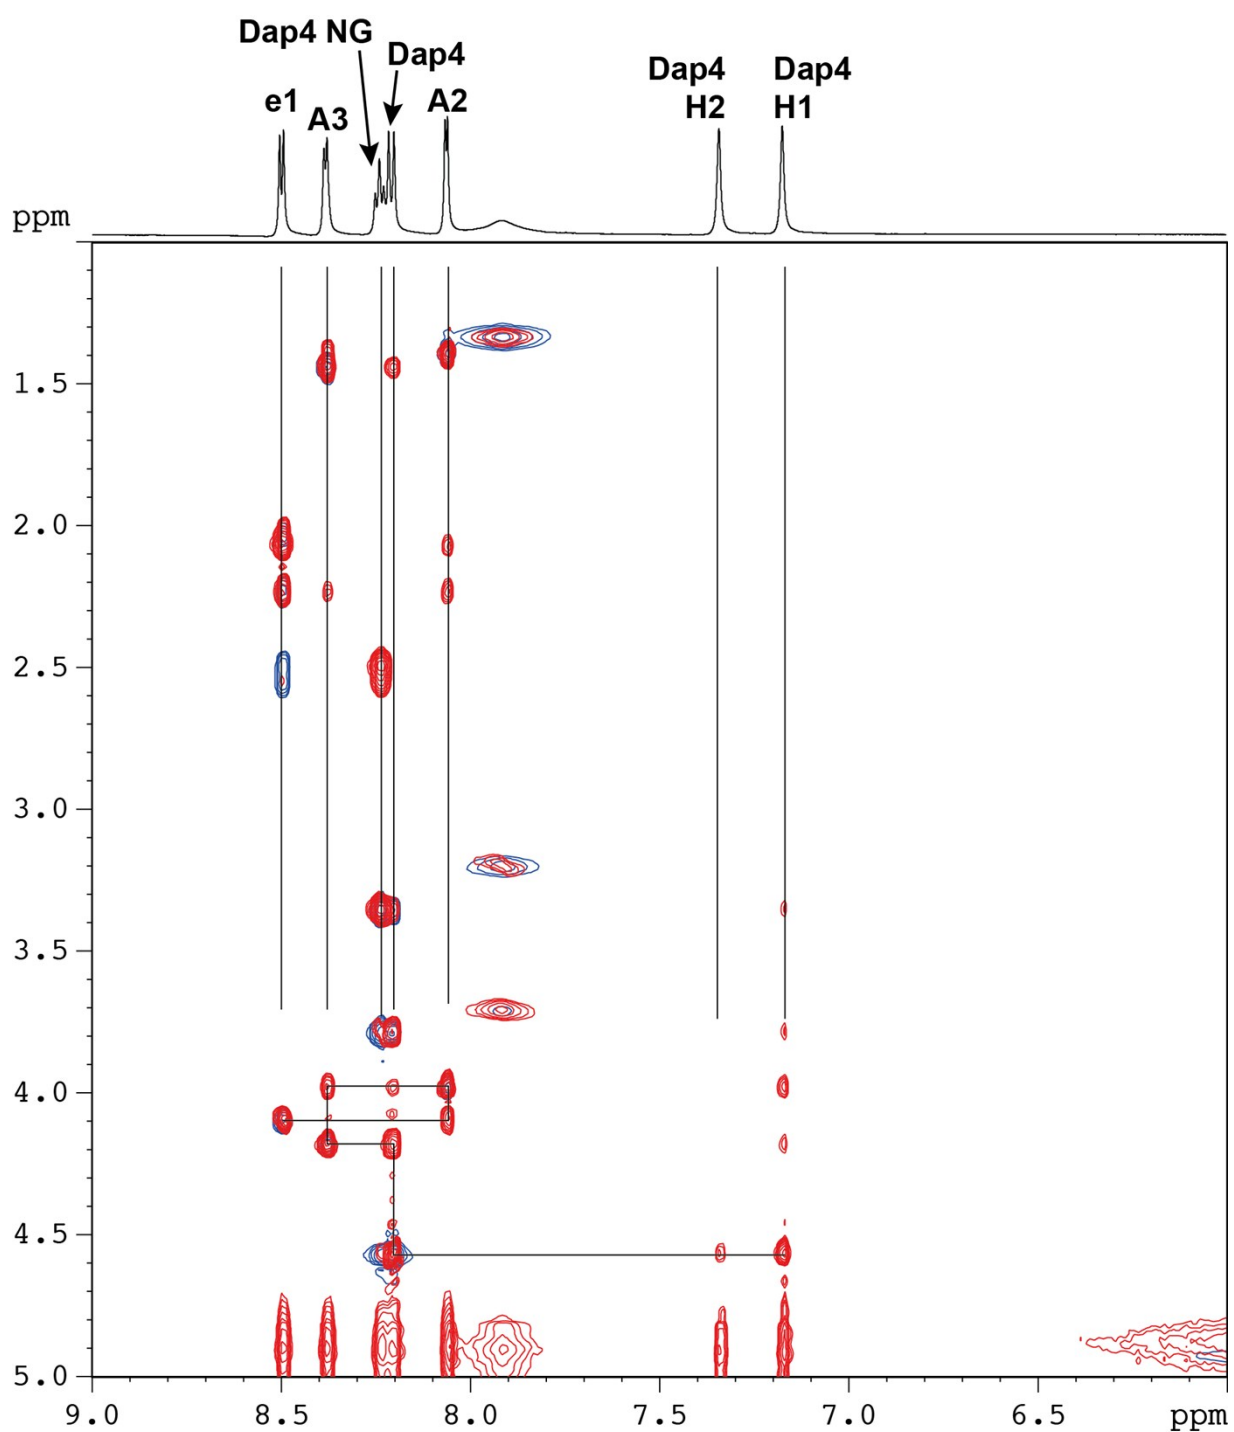

**Figure S34.** Skewers and sequential ROE walk for Ac-[eAADap]-NH<sub>2</sub> (**18**). (Blue = TOCSY spectrum. Red = ROESY spectrum).

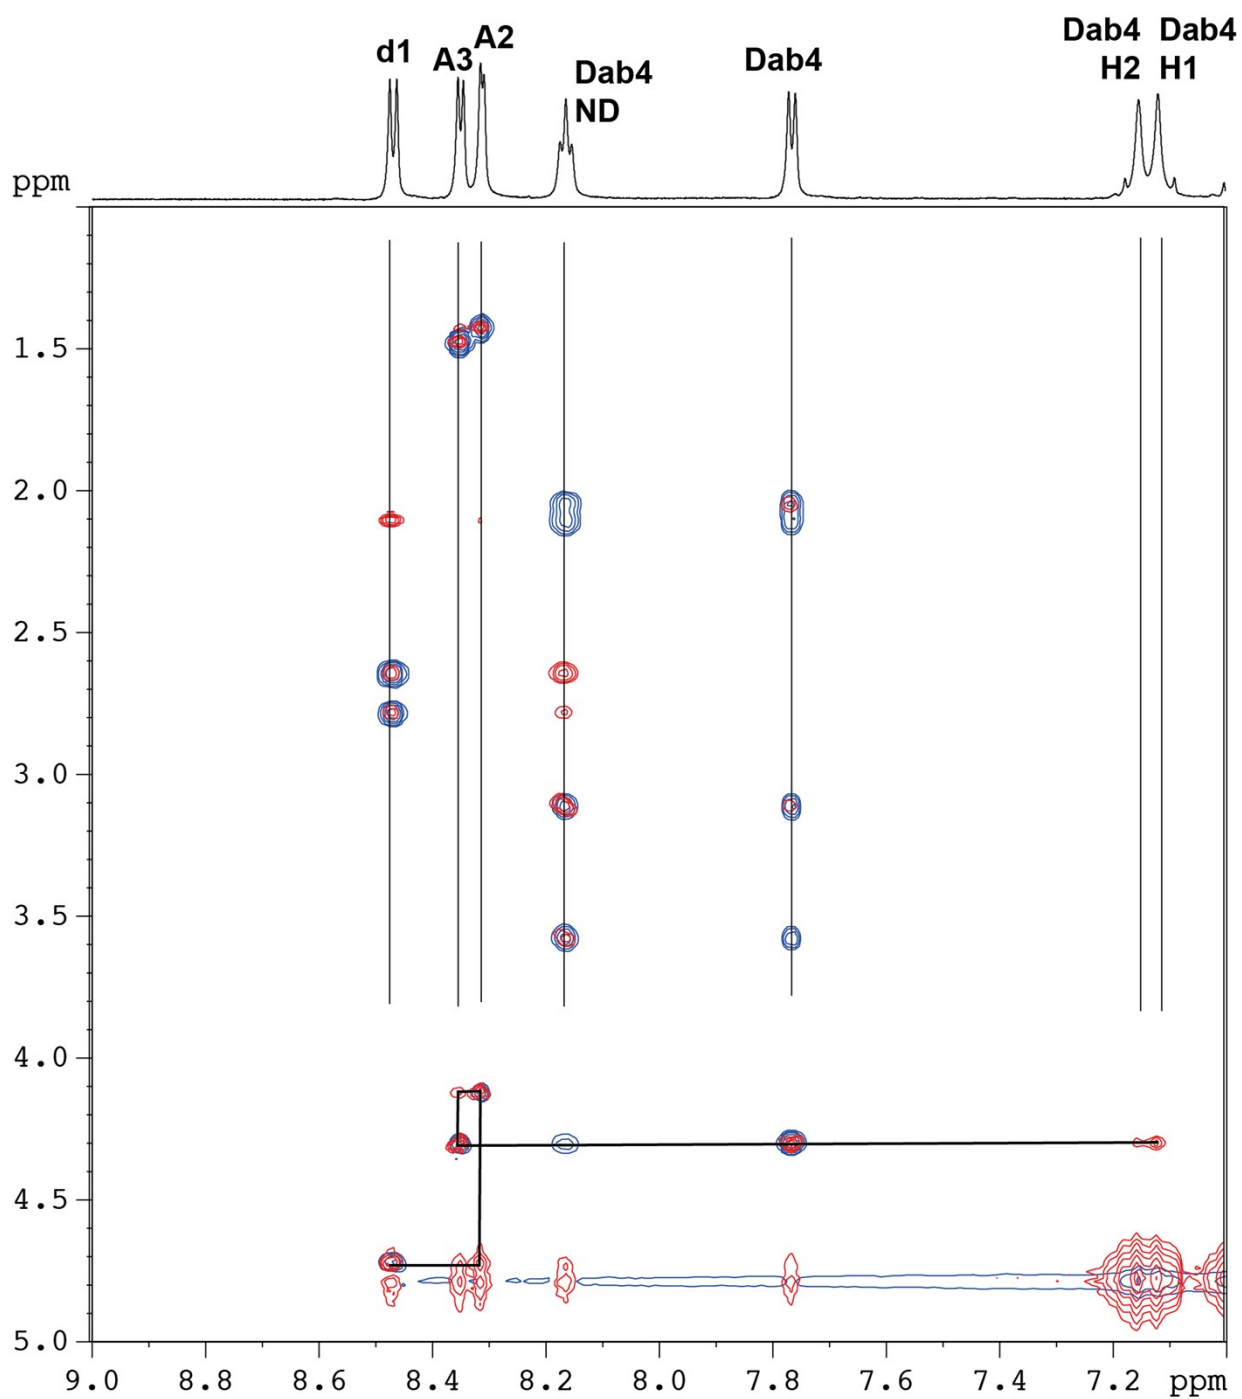

**Figure S35.** Skewers and sequential ROE walk for Ac-[dAADab]-NH<sub>2</sub> (**19**). (Blue = TOCSY spectrum. Red = ROESY spectrum).

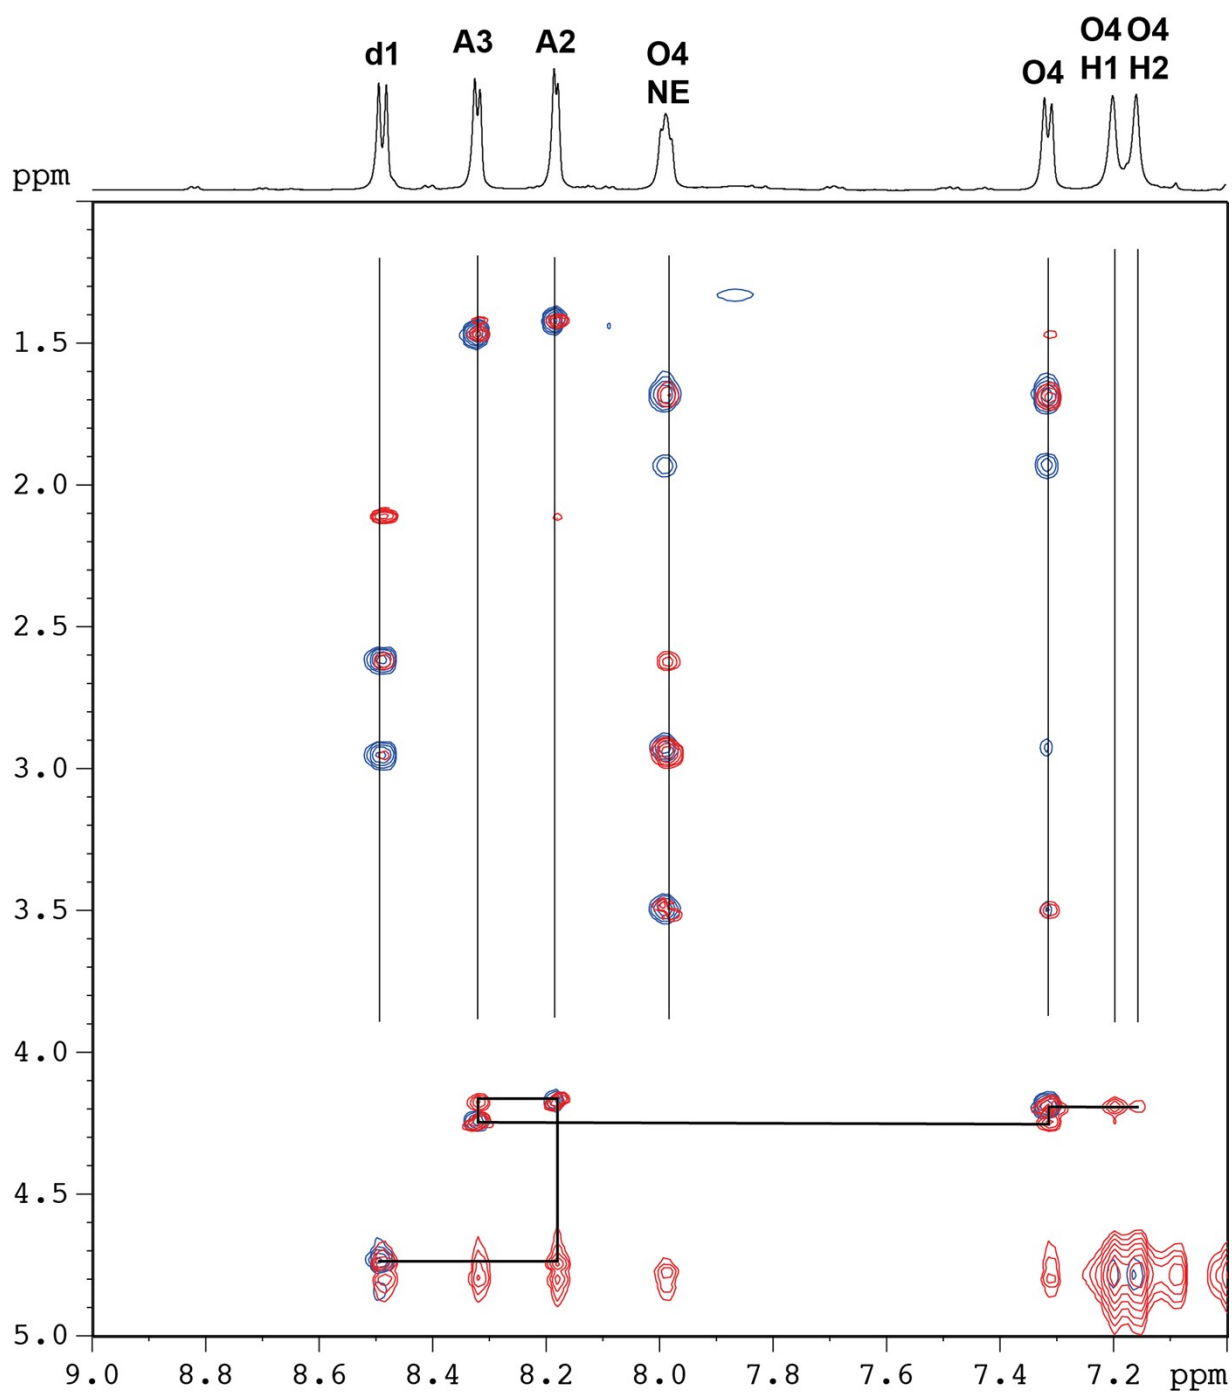

**Figure S36.** Skewers and sequential ROE walk for Ac-[dAAO]-NH<sub>2</sub> (20). (Blue = TOCSY spectrum. Red = ROESY spectrum).

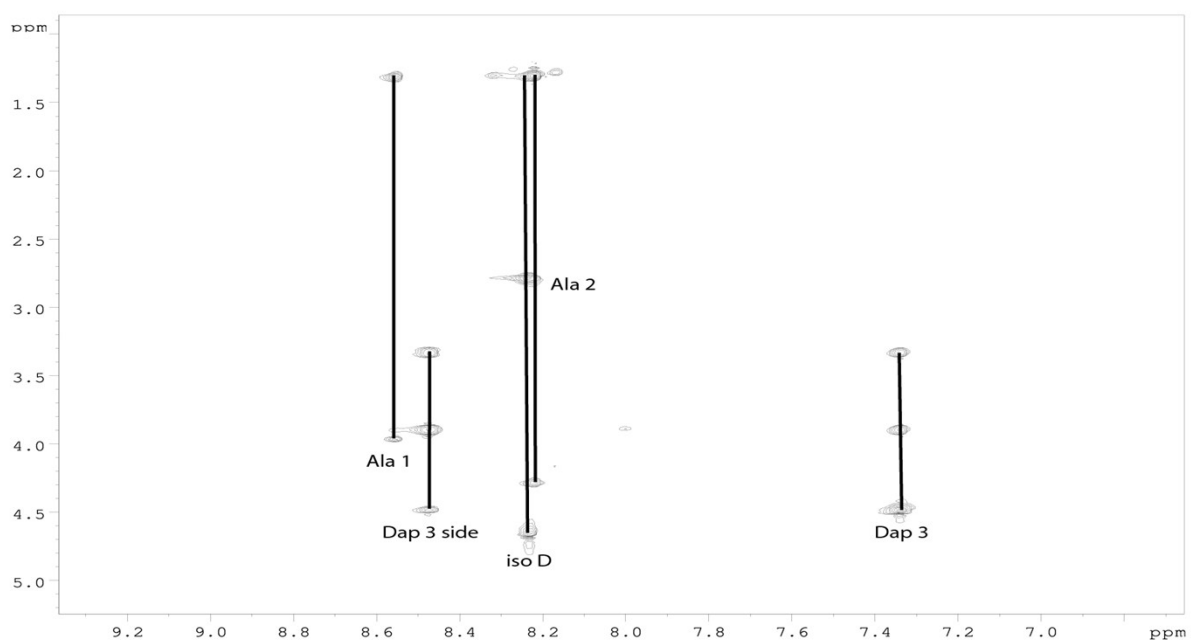

**Figure S37.** TOCSY spectrum for Ac-[IsoDAADap]-NH<sub>2</sub> (21).

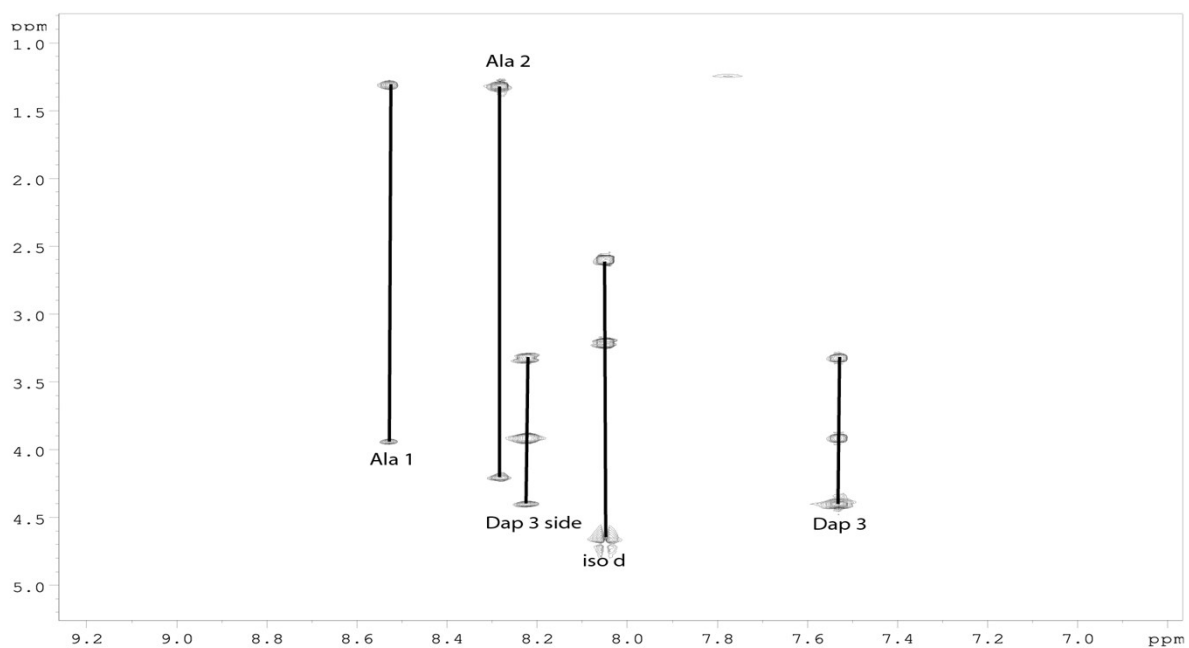

**Figure S38.** TOCSY spectrum for Ac-[IsodAADap]-NH<sub>2</sub> (**22**).

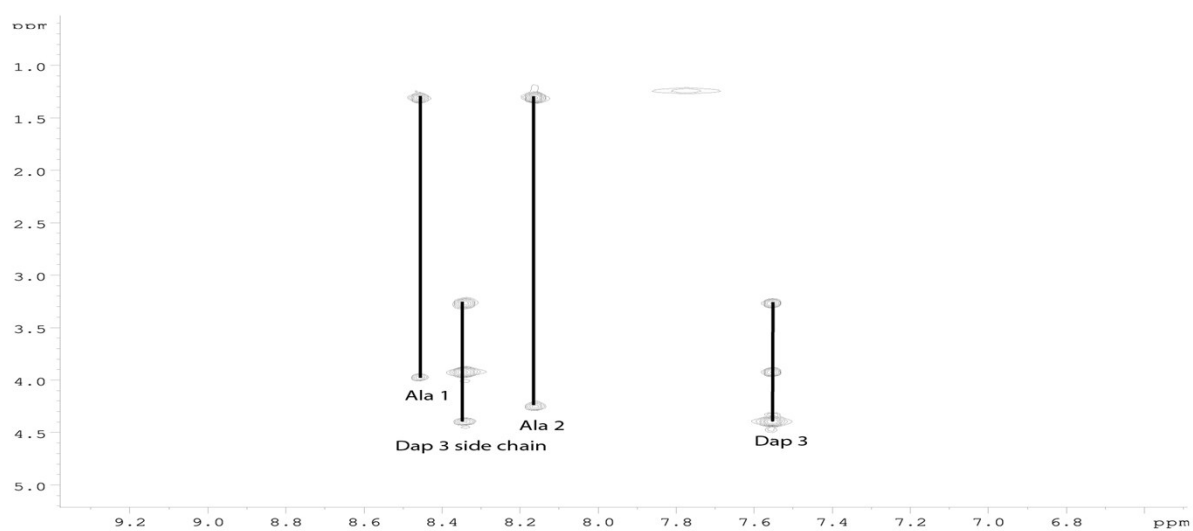

**Figure S39.** TOCSY spectrum for [SuccAADap]-NH<sub>2</sub> (23).

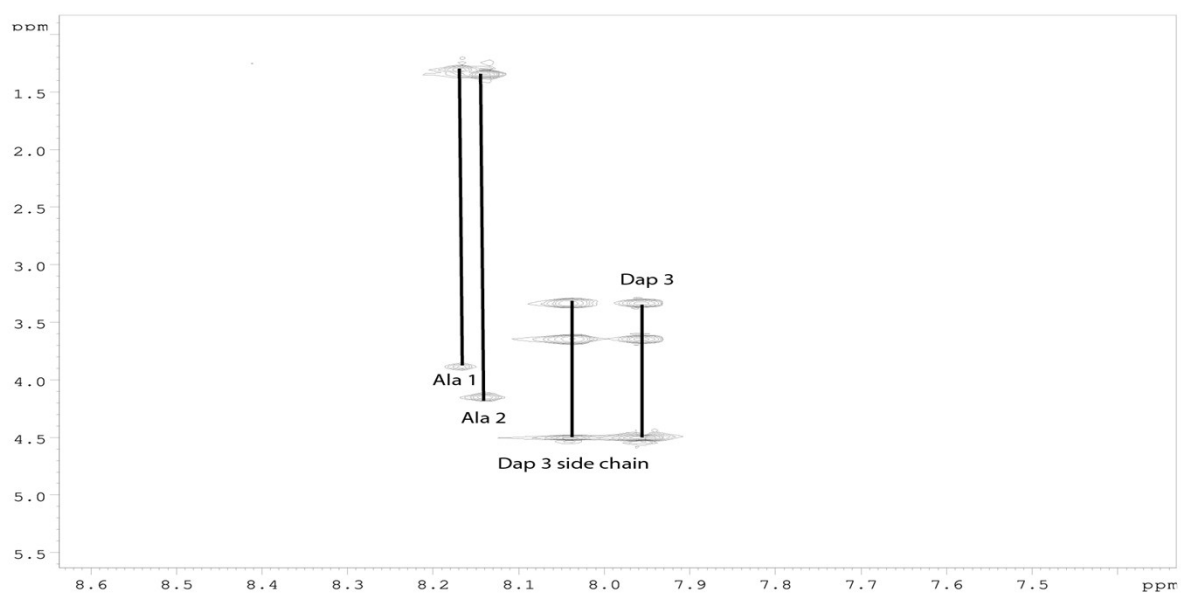

**Figure S40.** TOCSY spectrum for [GlutAADap]-NH<sub>2</sub> (**24**).

## 7.6 NMR spectra of N-capped peptides in H<sub>2</sub>O:D<sub>2</sub>O (9:1).

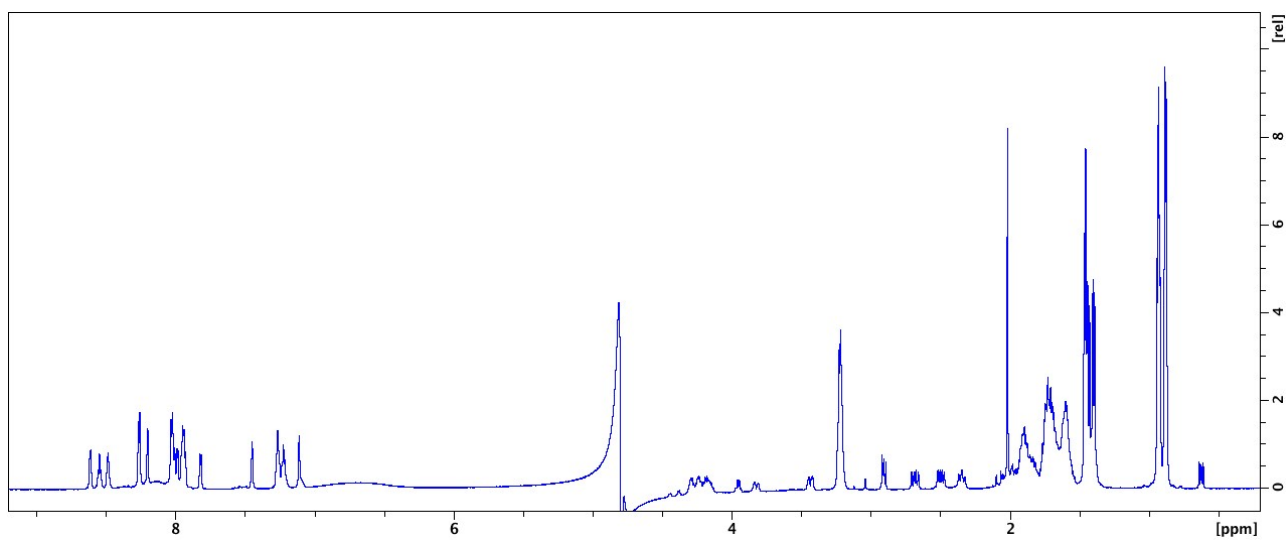

**Figure S41.** 600 MHz <sup>1</sup>H NMR spectrum of Ac-cyclo-(1,4)-[EAADap](ARL)<sub>3</sub>-NH<sub>2</sub> (**31**).

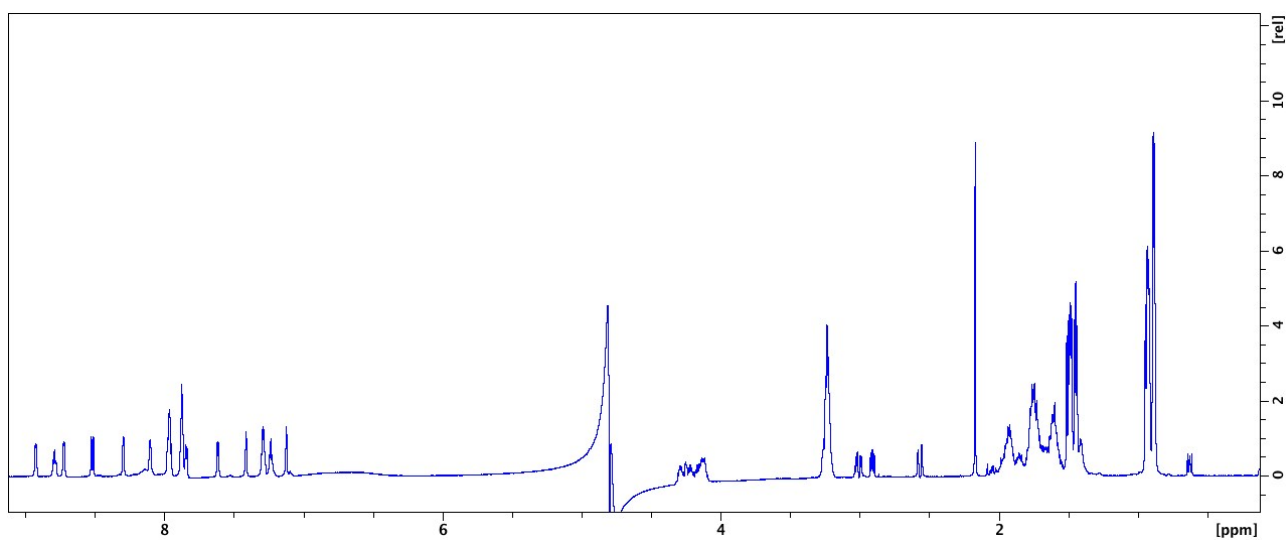

**Figure S42.** 600 MHz <sup>1</sup>H NMR spectrum of Ac-cyclo-(1,4)-[dAADap](ARL)<sub>3</sub>-NH<sub>2</sub> (**33**).



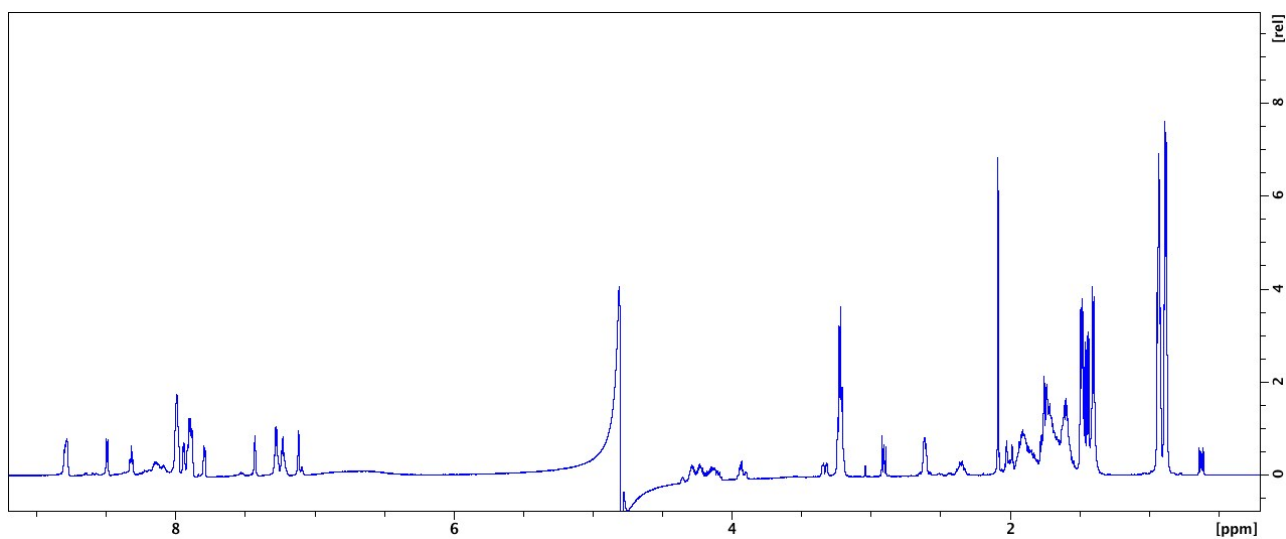

**Figure S43.** 600 MHz  $^1\text{H}$  NMR spectrum of Ac-cyclo-(1,4)-[eAADap](ARL) $_3$ -NH $_2$  (**34**).

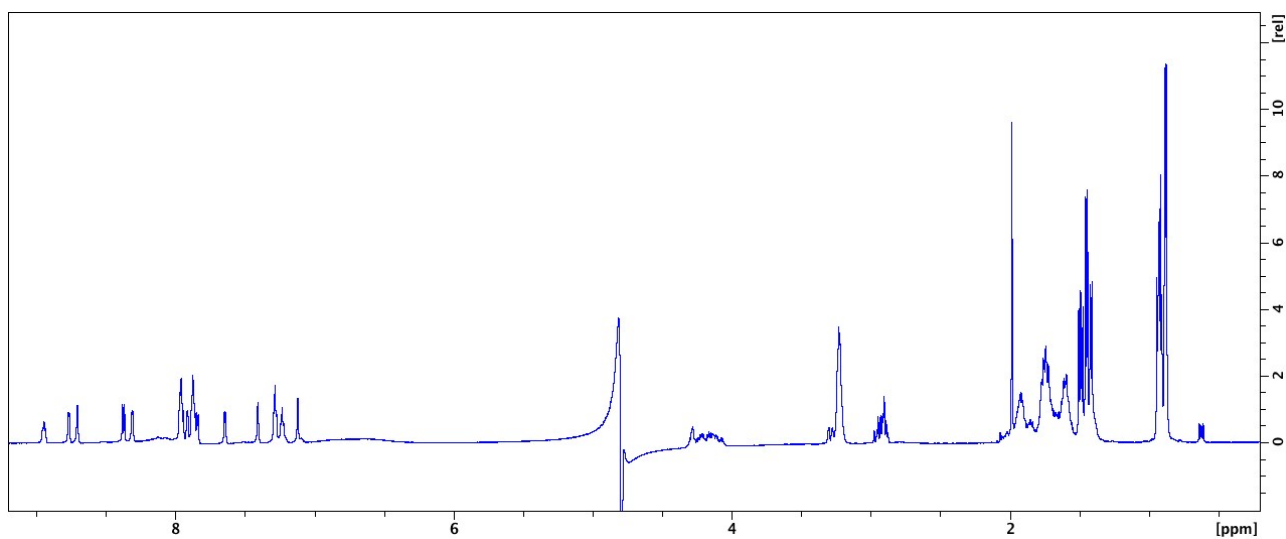

**Figure S44.** 600 MHz  $^1\text{H}$  NMR spectrum of Ac-cyclo-(1,4)-[isoDAADap](ARL) $_3$ -NH $_2$  (**36**).

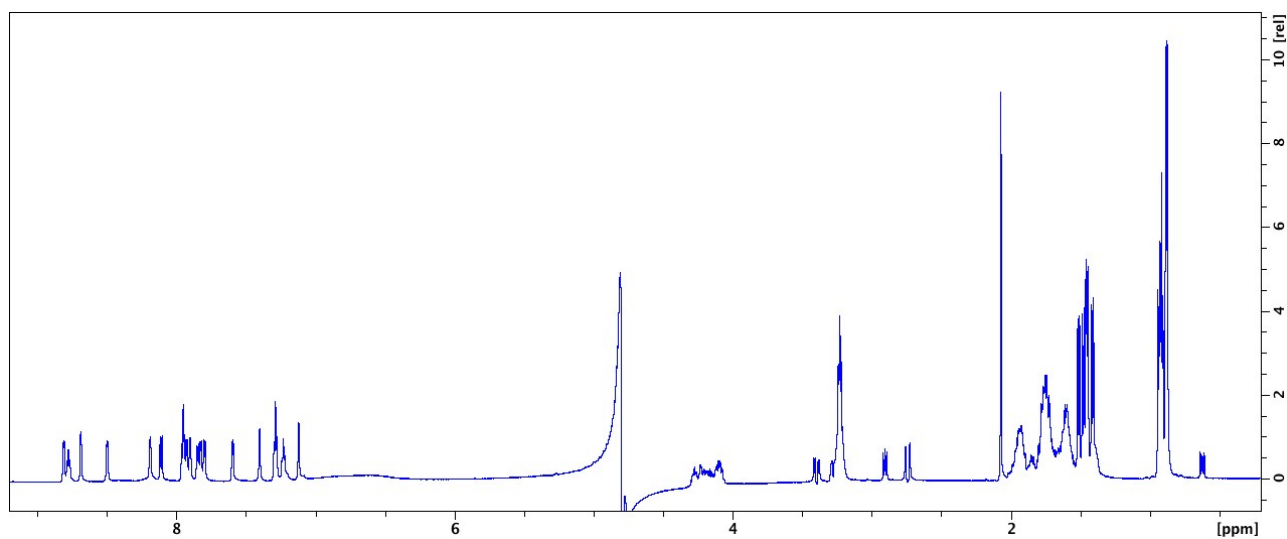

**Figure S45.** 600 MHz <sup>1</sup>H NMR spectrum of Ac-cyclo-(1,4)-[isodAADap](ARL)<sub>3</sub>-NH<sub>2</sub> (**37**).

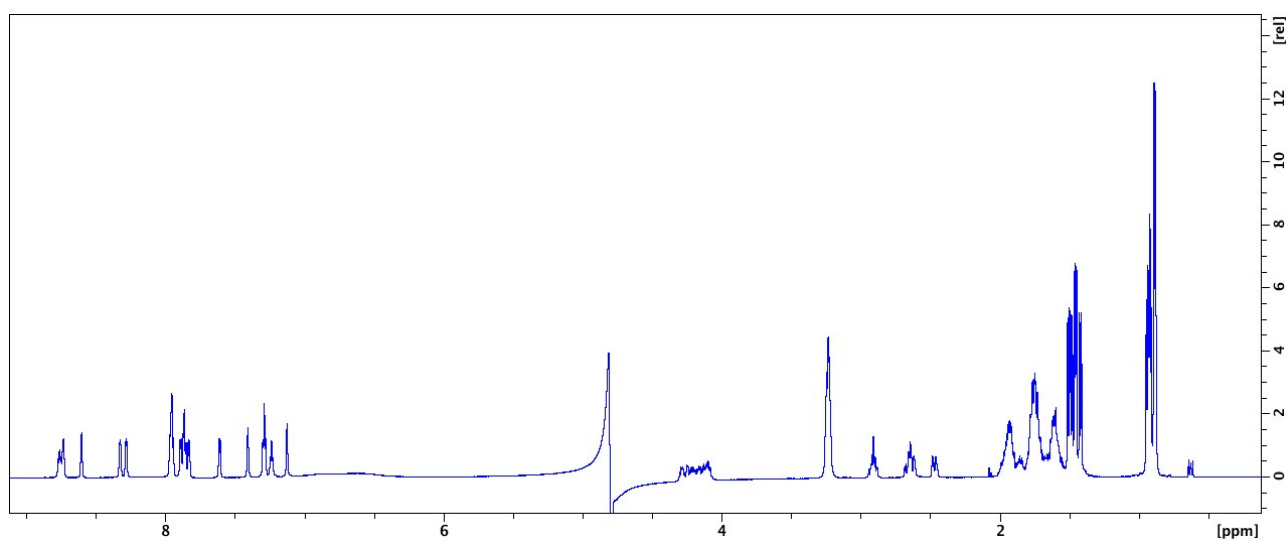

**Figure S46.** 600 MHz <sup>1</sup>H NMR spectrum of cyclo-(1,4)-[SuccAADap](ARL)<sub>3</sub>-NH<sub>2</sub> (**38**).

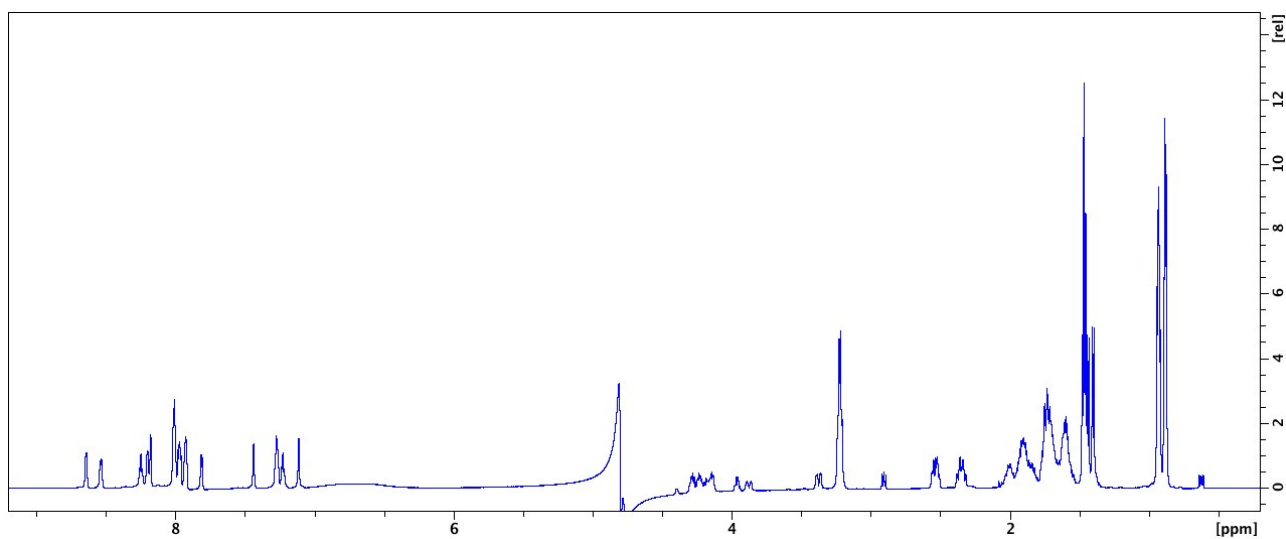

**Figure S47.** 600 MHz  $^1\text{H}$  NMR spectrum of cyclo-(1,4)-[GlutAADap](ARL) $_3$ -NH $_2$  (**39**).

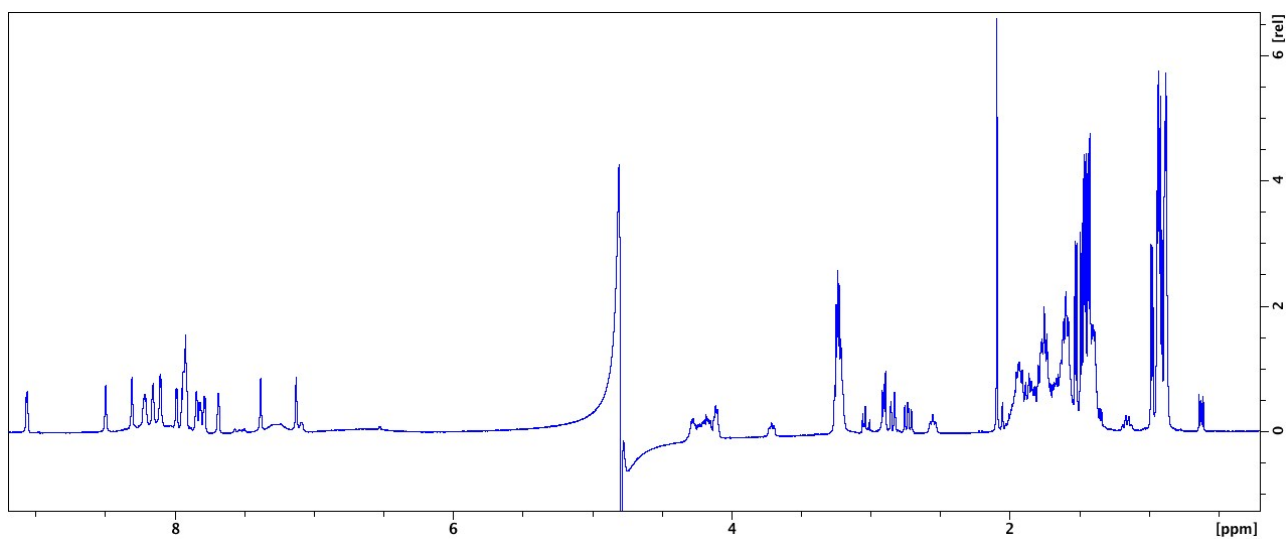

**Figure S48.** 600 MHz  $^1\text{H}$  NMR spectrum of Ac-cyclo-(1,5)-[KAAAD](ARL) $_3$ -NH $_2$  (**40**).
